# Supplementary material
Source: Royal Society of Chemistry journal article supplement (doi:10.1039/d6tc00224b)
Supplement: d6tc00224b1.pdf [file d6tc00224b1.pdf]

*Electronic Supporting Information*

**Modulating Electrochromic Properties *via* Thiophene Donors in Thieno[3,4-*c*]pyrrole-4,6-dione-based Conjugated Polymers**

Kok Chan Chong,<sup>a, b, c</sup> Kang Le Osmund Chin,<sup>a, b</sup> Shi Jun Ang,<sup>d</sup> Ran Tao,<sup>a, b</sup> Jianwei Xu,<sup>a, \*</sup> Ming Hui Chua<sup>a, b, \*</sup>

<sup>a</sup> Institute of Sustainability for Chemicals, Energy and Environment (ISCE<sup>2</sup>), Agency for Science, Technology and Research (A\*STAR), Singapore. 1 Pesek Road, Jurong Island, Singapore 627833, Republic of Singapore

<sup>b</sup> Institute of Materials Research and Engineering (IMRE), Agency for Science, Technology and Research (A\*STAR), Singapore. 2 Fusionopolis Way, Innovis, #08-03, Singapore 138634, Republic of Singapore.

<sup>c</sup> Future Energy Acceleration & Translation (FEAT), Strategic Research & Translational Thrust (SRTT), A\*STAR Research Entities, 1 Fusionopolis Way, #20-10, Connexis North Tower, Singapore 138632, Republic of Singapore

<sup>d</sup> Institute of High Performance Computing (IHPC), Agency for Science, Technology and Research (A\*STAR), Singapore. 1 Fusionopolis Way, #16-16, Connexis North Tower, Singapore 138632, Republic of Singapore

\* Corresponding authors: M. H. Chua (chua\_ming\_hui@a-star.edu.sg); J. Xu (xu\_jianwei@a-star.edu.sg)

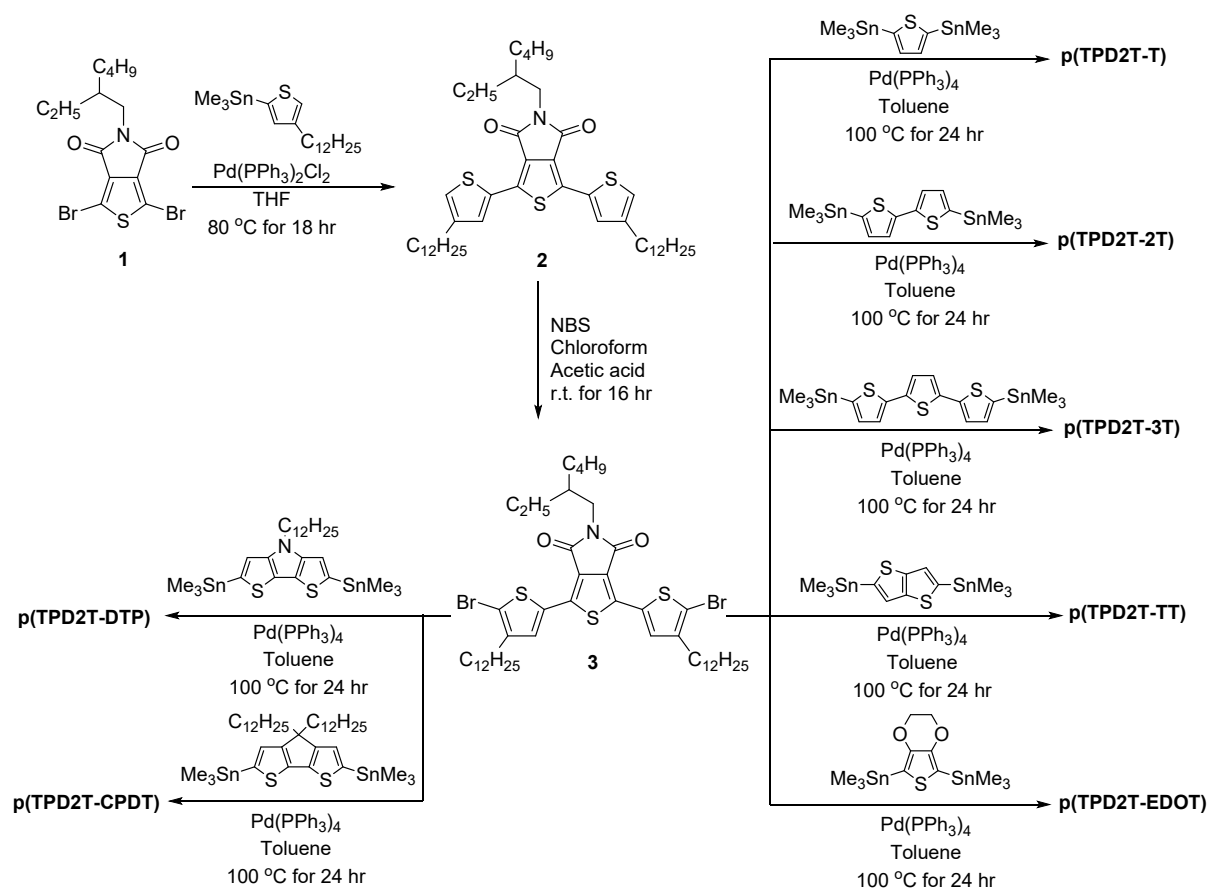

**Scheme S1.** Synthesis of TPD polymers p(TPD2T-T), p(TPD2T-2T), p(TPD2T-3T), p(TPD2T-TT), p(TPD2T-EDOT), p(TPD2T-DTP), and p(TPD2T-CPDT).

**Table S1.** Gel Permeation Chromatography (GPC) Characterization, Thermal Analysis, and Synthesis Yield of TPD polymers p(TPD2T-T), p(TPD2T-2T), p(TPD2T-3T), p(TPD2T-TT), p(TPD2T-EDOT), p(TPD2T-DTP), and p(TPD2T-CPDT).

| Polymer       | Gel Permeation Chromatography |                          |                  | Thermal Analysis                        | Synthesis |
|---------------|-------------------------------|--------------------------|------------------|-----------------------------------------|-----------|
|               | $M_n$ (kDa) <sup>a</sup>      | $M_w$ (kDa) <sup>b</sup> | PDI <sup>c</sup> | $T_d$ ( $^\circ\text{C}$ ) <sup>d</sup> | Yield (%) |
| p(TPD2T-T)    | 9.017                         | 9.350                    | 1.037            | 415.13                                  | 98.0      |
| p(TPD2T-2T)   | 12.145                        | 17.822                   | 1.467            | 425.96                                  | 93.0      |
| p(TPD2T-3T)   | 54.295                        | 104.517                  | 1.925            | 230.68                                  | 14.0      |
| p(TPD2T-TT)   | 13.546                        | 21.500                   | 1.587            | 407.63                                  | 99.0      |
| p(TPD2T-EDOT) | 5.078                         | 9.650                    | 1.784            | 245.10                                  | 70.4      |
| p(TPD2T-DTP)  | 6.300                         | 10.632                   | 1.688            | 383.47                                  | 90.0      |
| p(TPD2T-CPDT) | 10.496                        | 19.442                   | 1.852            | 242.78                                  | 90.0      |

<sup>a</sup> number-average molecular weight; <sup>b</sup> weight-average molecular weight; <sup>c</sup> Polydispersity Index =  $M_w/M_n$ ; <sup>d</sup> Temperature at which 5% weight loss of the polymers were recorded from thermogravimetric analysis (TGA)

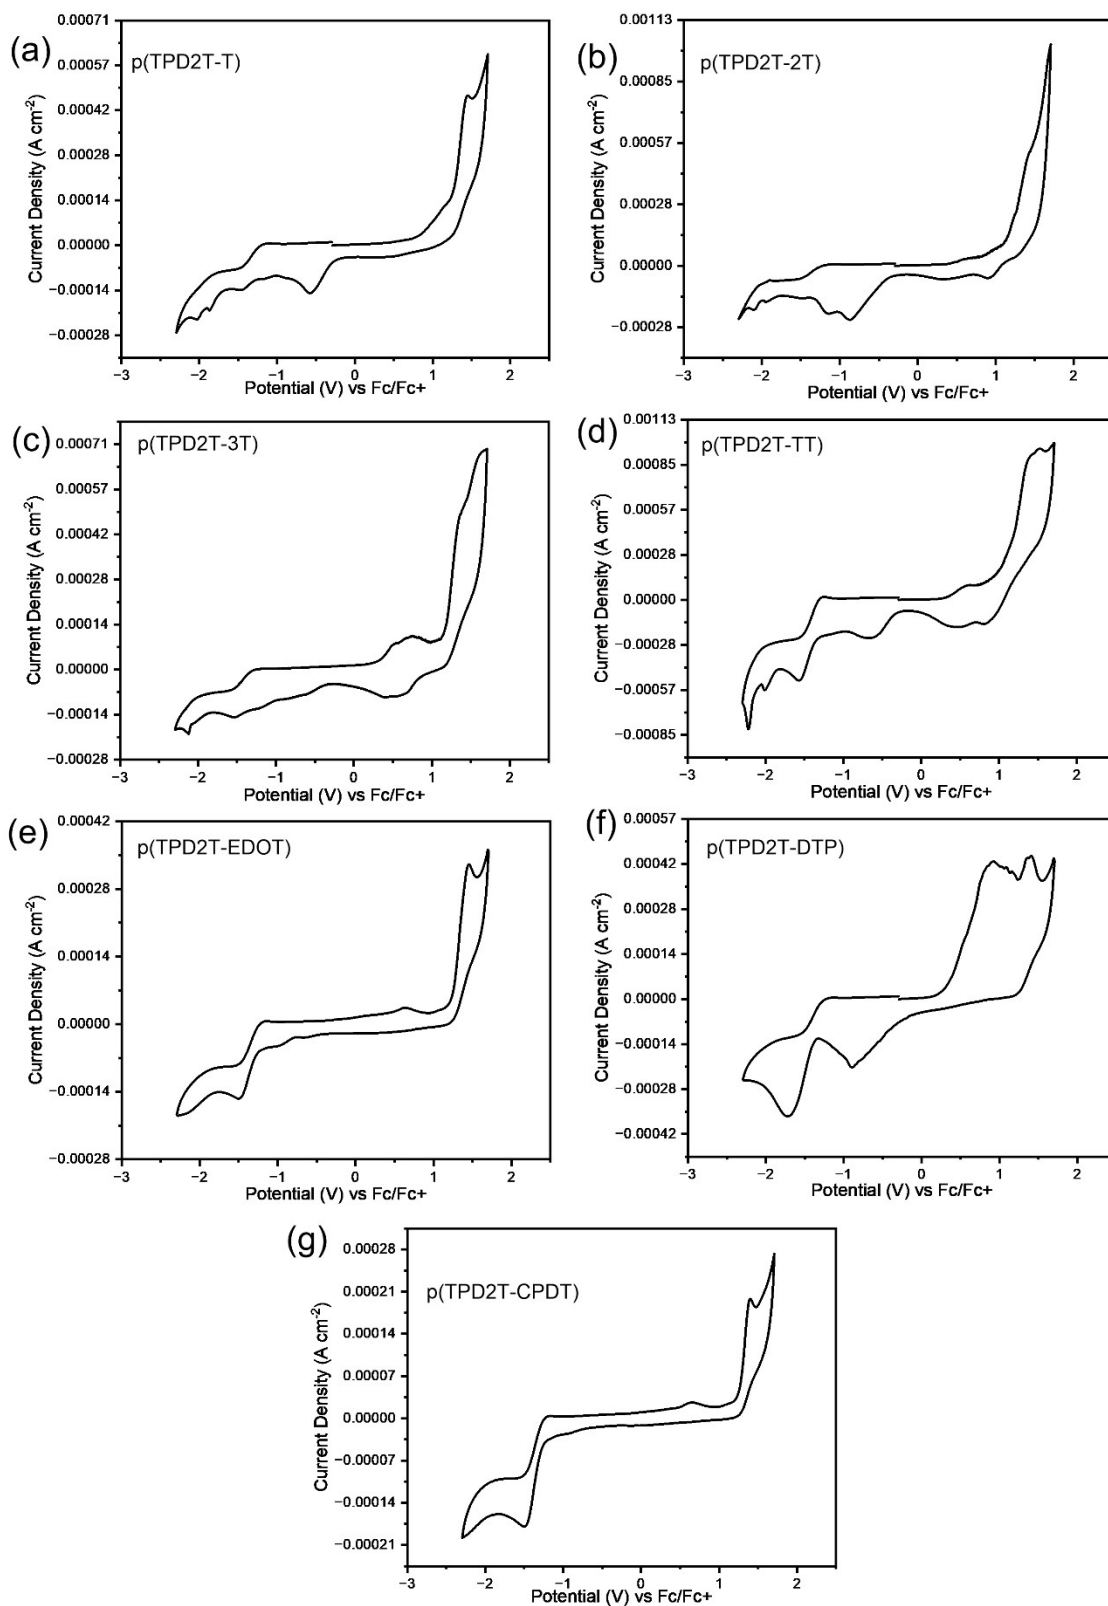

**Figure S1.** Cyclic voltammograms of polymers (a) p(TPD2T-T), (b) p(TPD2T-2T), (c) p(TPD2T-3T), (d) p(TPD2T-TT), (e) p(TPD2T-EDOT), (f) p(TPD2T-DTP), and (g) p(TPD2T-CPDT) in solution.

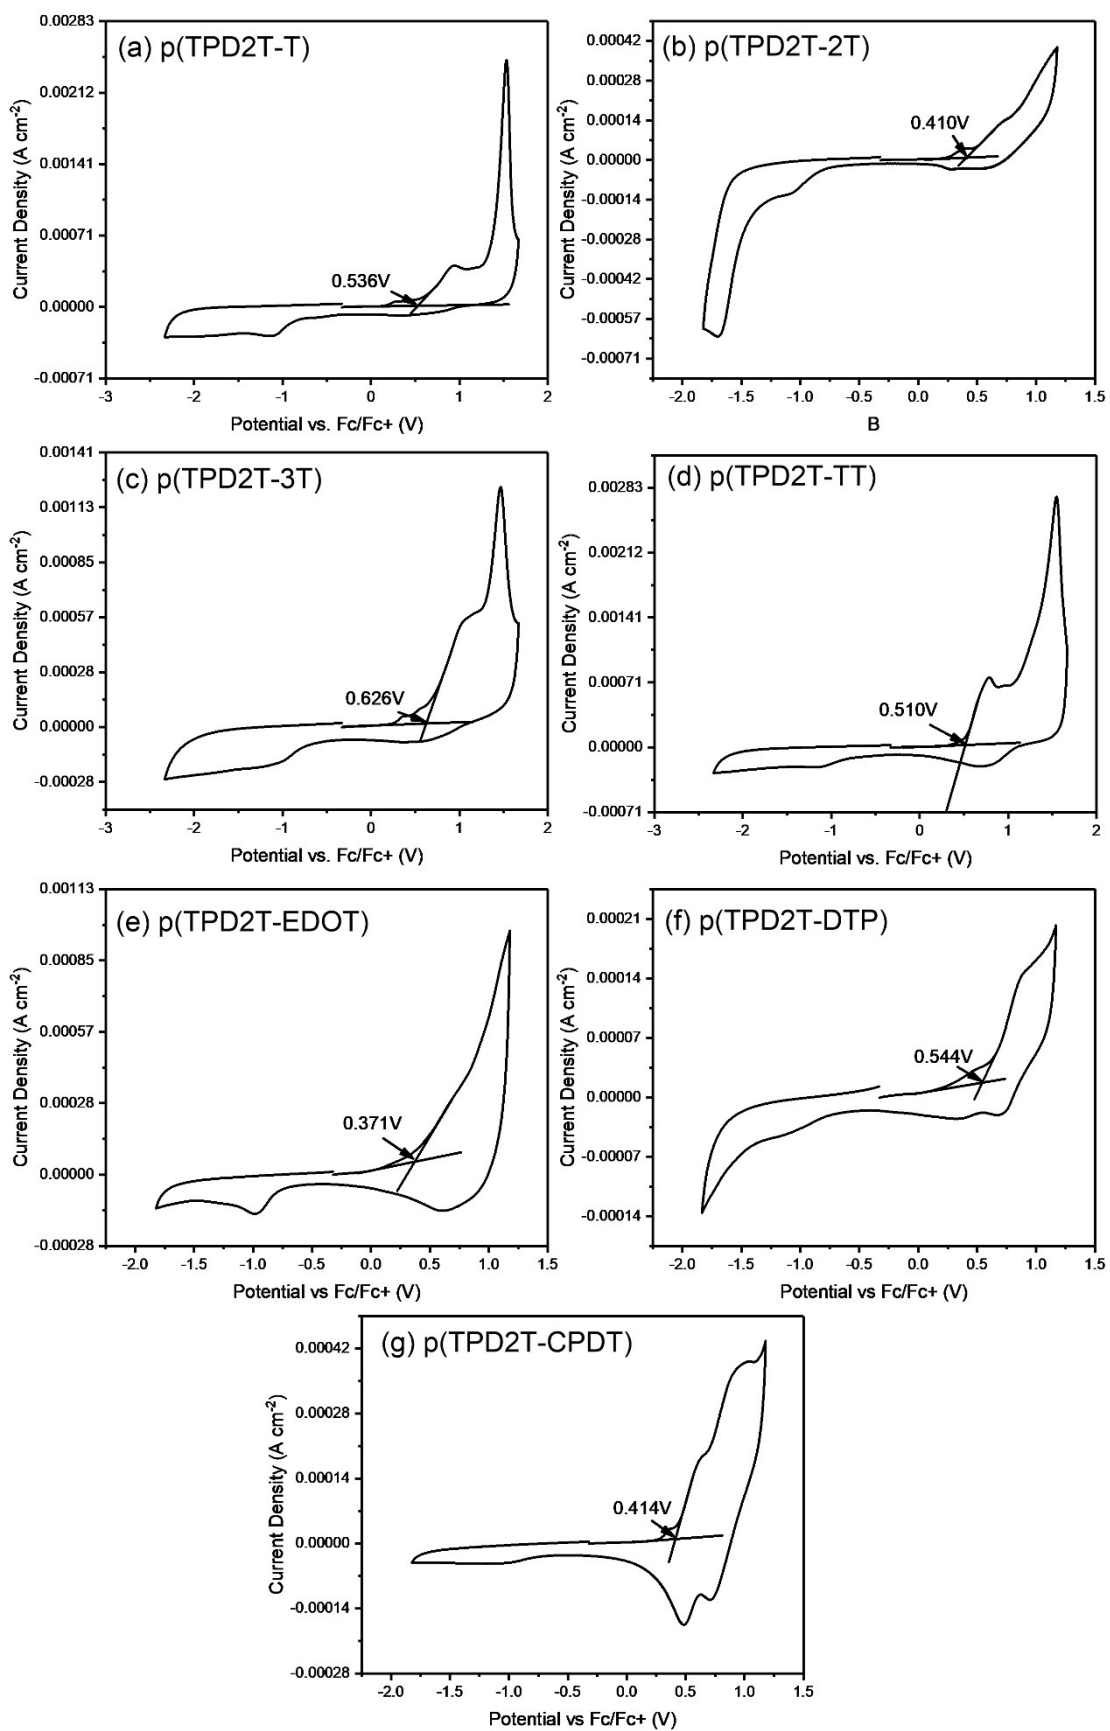

**Figure S2.** Cyclic voltammograms of polymers (a) p(TPD2T-T), (b) p(TPD2T-2T), (c) p(TPD2T-3T), (d) p(TPD2T-TT), (e) p(TPD2T-EDOT), (f) p(TPD2T-DTP), and (g) p(TPD2T-CPDT) in thin film.

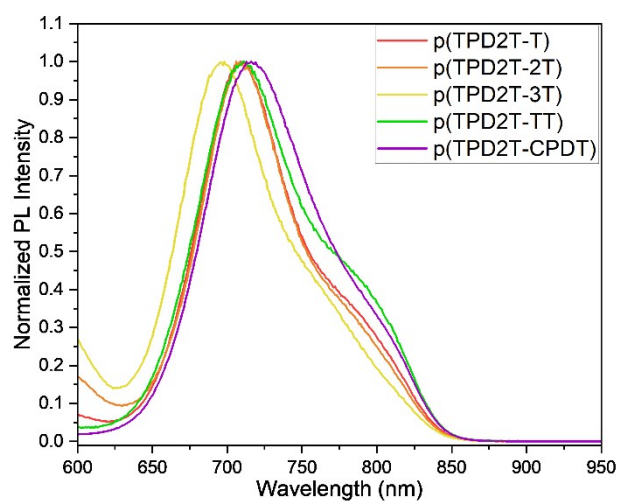

**Figure S3.** Normalized thin film photoluminescence spectra of polymers p(TPD2T-T), p(TPD2T-2T), p(TPD2T-3T), p(TPD2T-TT), and p(TPD2T-CPDT).

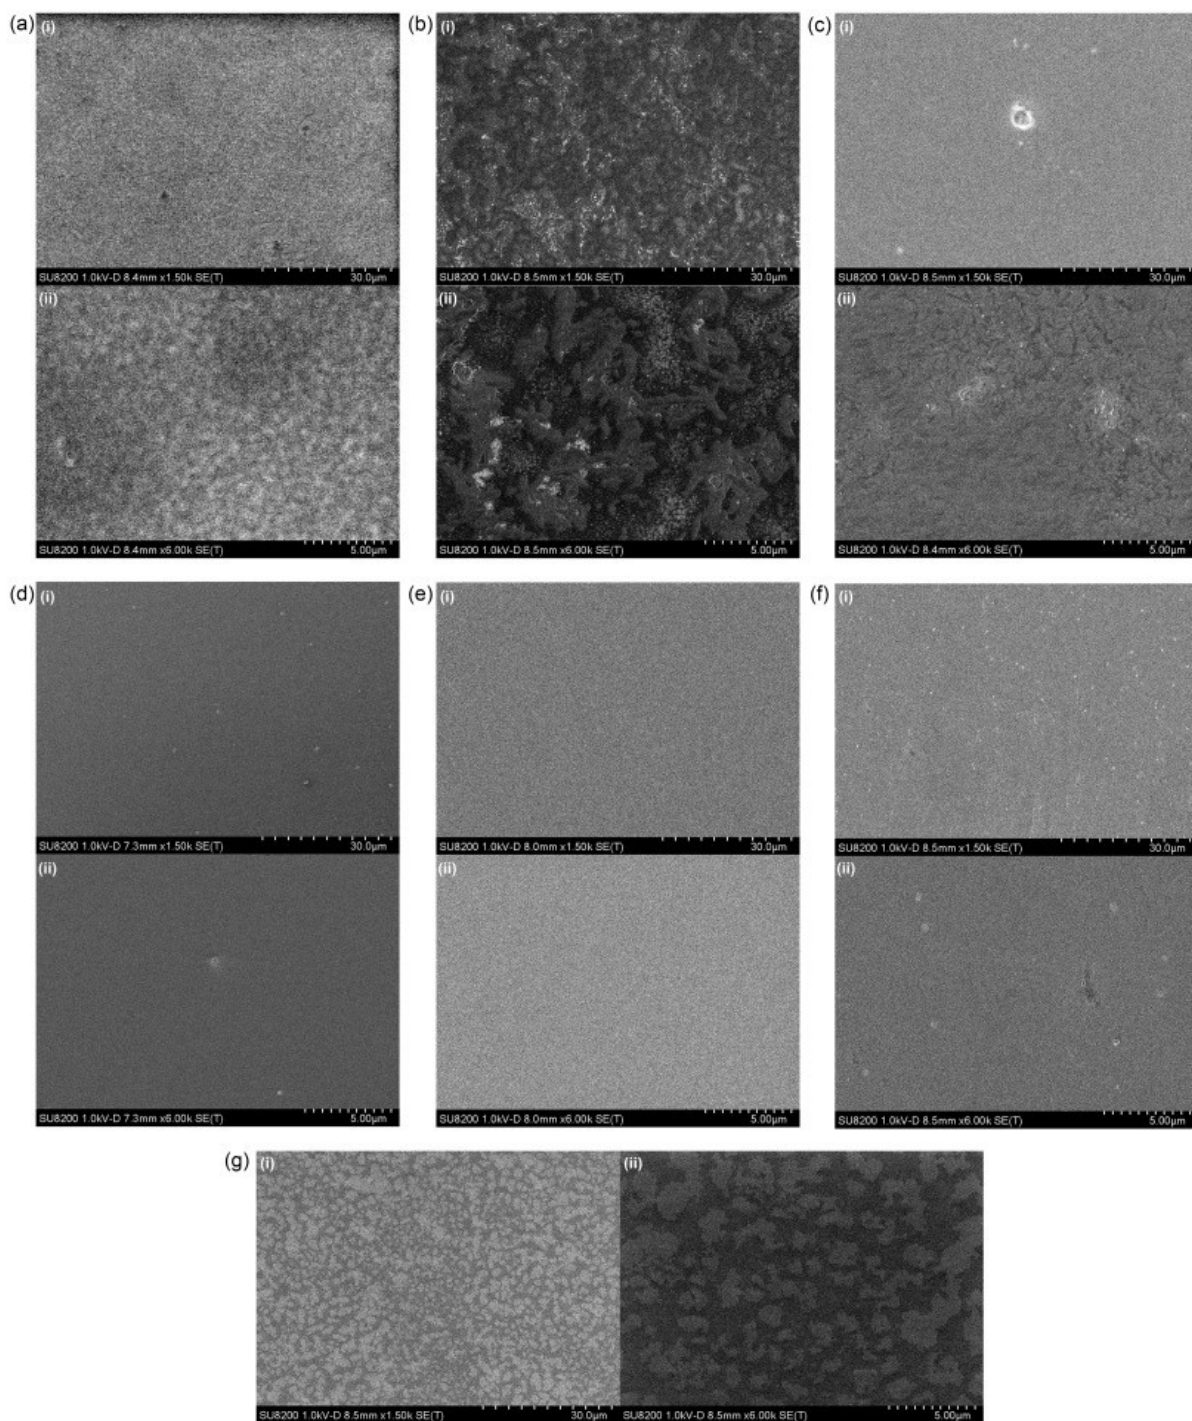

**Figure S4.** SEM images of polymers (a) p(TPD2T-T), (b) p(TPD2T-2T), (c) p(TPD2T-3T), (d) p(TPD2T-TT), (e) p(TPD2T-EDOT), (f) p(TPD2T-DTP), and (g) p(TPD2T-CPDT) under i) 1500x and ii) 6000x magnification.

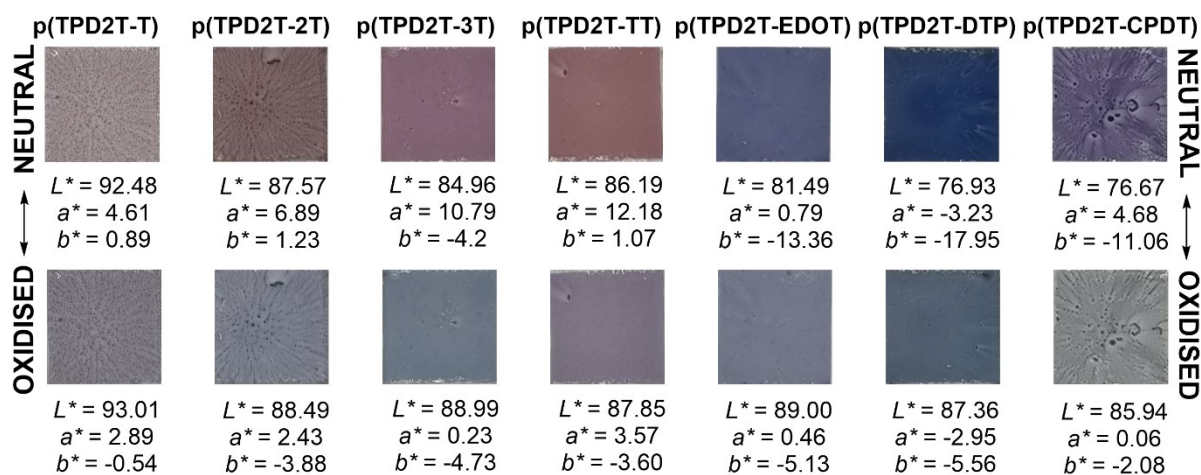

**Figure S5.** EC colour changes of polymers p(TPD2T-T), p(TPD2T-2T), p(TPD2T-3T), p(TPD2T-TT), and p(TPD2T-CPDT) upon undergoing electro-oxidation, and their corresponding  $L^*$   $a^*$   $b^*$  colour coordinates according to CIE 1976 colour space.

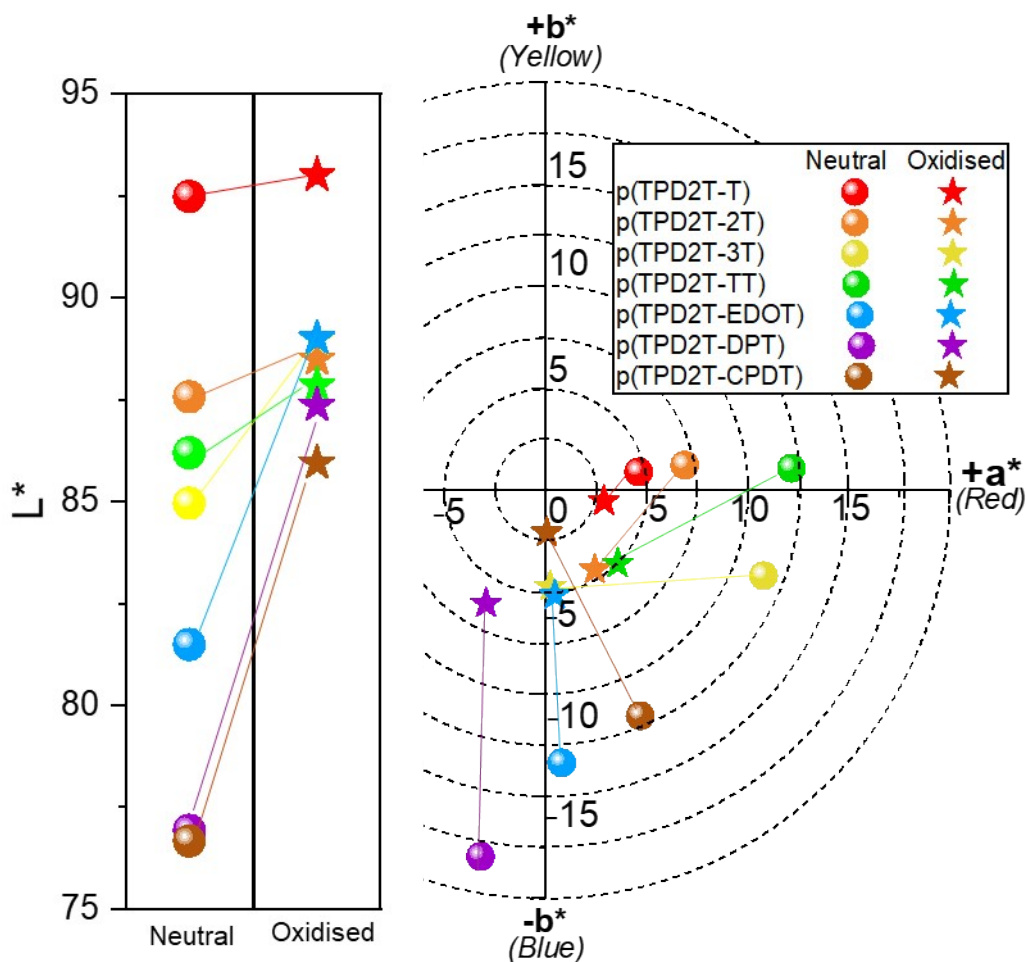

**Figure S6.** Plots of colour coordinates on a 1-dimensional  $L^*$  scale (left) and a 2-dimensional  $a^*$  vs  $b^*$  colour chart (right) for the seven TPD polymers in the neutral and oxidised states.

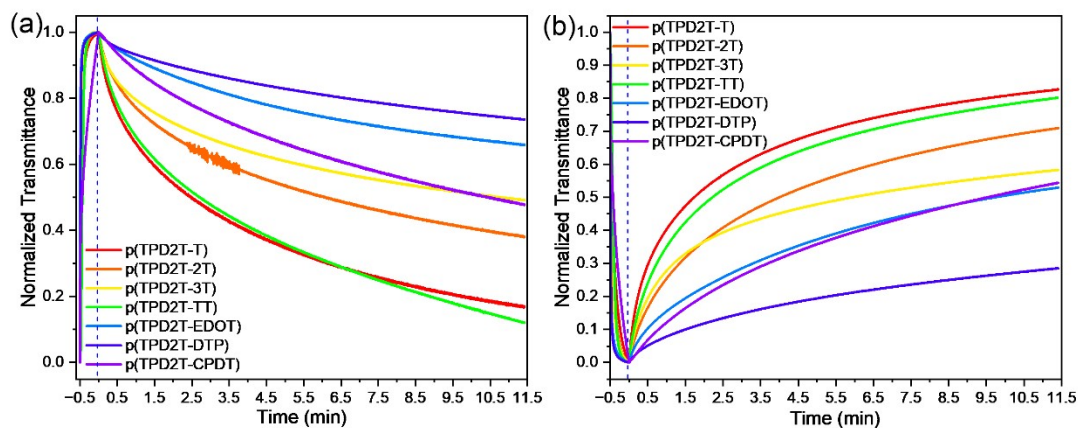

**Figure S7.** Open memory retention of the p(TPD2T-T), p(TPD2T-2T), p(TPD2T-3T), p(TPD2T-TT), and p(TPD2T-CPDT) at their respective (a) visible (492, 490, 520, 497, 595, 608, and 555 nm, respectively), and (b) NIR wavelengths of interest (1242, 1196, 1256, 1238, 1800, 1400, and 1380 nm, respectively), as reflected by the changes in normalized transmittance after oxidation, under open circuit conditions over 10 minutes.

**Table S2.** EC switching parameters of the seven TPD polymers from chronoabsorptometry studies.

| Polymer       | Film Thickness (nm) | Visible                     |                                 |                 |                                             |                                             |                                    | NIR                         |                               |                 |                                             |                                             |                                    |
|---------------|---------------------|-----------------------------|---------------------------------|-----------------|---------------------------------------------|---------------------------------------------|------------------------------------|-----------------------------|-------------------------------|-----------------|---------------------------------------------|---------------------------------------------|------------------------------------|
|               |                     | $\lambda_{\text{abs}}$ (nm) | Doping/ De-doping Potential (V) | $\Delta\%T$ (%) | $\tau_{\text{ox}}$ or $\tau_{\text{b}}$ (s) | $\tau_{\text{re}}$ or $\tau_{\text{c}}$ (s) | CE ( $\text{cm}^2 \text{C}^{-1}$ ) | $\lambda_{\text{abs}}$ (nm) | Doping/ De-doping Voltage (V) | $\Delta\%T$ (%) | $\tau_{\text{ox}}$ or $\tau_{\text{c}}$ (s) | $\tau_{\text{re}}$ or $\tau_{\text{b}}$ (s) | CE ( $\text{cm}^2 \text{C}^{-1}$ ) |
| p(TPD2T-T)    | 94.6±0.7            | 492                         | ±2.2                            | 19.8±2.0        | 11.5±1.6                                    | 3.7±1.7                                     | 349.6                              | 1242                        | ±2.2                          | 27.4±0.2        | 19.9±0.7                                    | 6.1±0.5                                     | 200.0                              |
| p(TPD2T-2T)   | 61.6±4.2            | 490                         | ±2.0                            | 12.4±1.1        | 27.3±1.6                                    | 10.4±0.6                                    | 207.5±3.5                          | 1196                        | ±2.0                          | 20.2±1.5        | 23.8±0.7                                    | 3.4±0.3                                     | 293.3±5.6                          |
| p(TPD2T-3T)   | 70.8±18.3           | 520                         | ±2.0                            | 17.5±2.5        | 16.7±4.3                                    | 3.0±0.3                                     | 377.3±64.7                         | 1256                        | ±2.0                          | 42.1±0.4        | 17.9±0.2                                    | 2.3±0.1                                     | 630.2±11.4                         |
| p(TPD2T-TT)   | 226.8±32.1          | 497                         | ±2.0                            | 17.7±0.3        | 24.4±6.4                                    | 3.1±1.4                                     | 275.1±23.4                         | 1238                        | ±2.0                          | 30.4±0.1        | 27.4±0.6                                    | 2.1±0.1                                     | 340.4±17.4                         |
| p(TPD2T-EDOT) | 95.1±2.6            | 595                         | ±2.0                            | 23.8±0.9        | 9.0±0.1                                     | 1.7±0.1                                     | 720.7±2.8                          | 1800                        | ±2.0                          | 46.7±3.3        | 11.9±0.4                                    | 1.3±0.0                                     | 1012.1±12.4                        |
| p(TPD2T-DTP)  | 46.4±19.0           | 608                         | ±2.0                            | 20.0±1.0        | 4.3±0.1                                     | 0.7±0.1                                     | 801.1±53.2                         | 1400                        | ±2.0                          | 44.8±3.7        | 6.8±0.3                                     | 1.2±0.1                                     | 1358.5±12.3                        |
| p(TPD2T-CPDT) | 59.2±7.7            | 555                         | ±2.0                            | 18.2±2.7        | 36.1±6.5                                    | 9.6±0.9                                     | 245.9±16.0                         | 1380                        | ±2.0                          | 23.7±2.6        | 46.4±6.7                                    | 3.6±0.4                                     | 247.6±29.2                         |

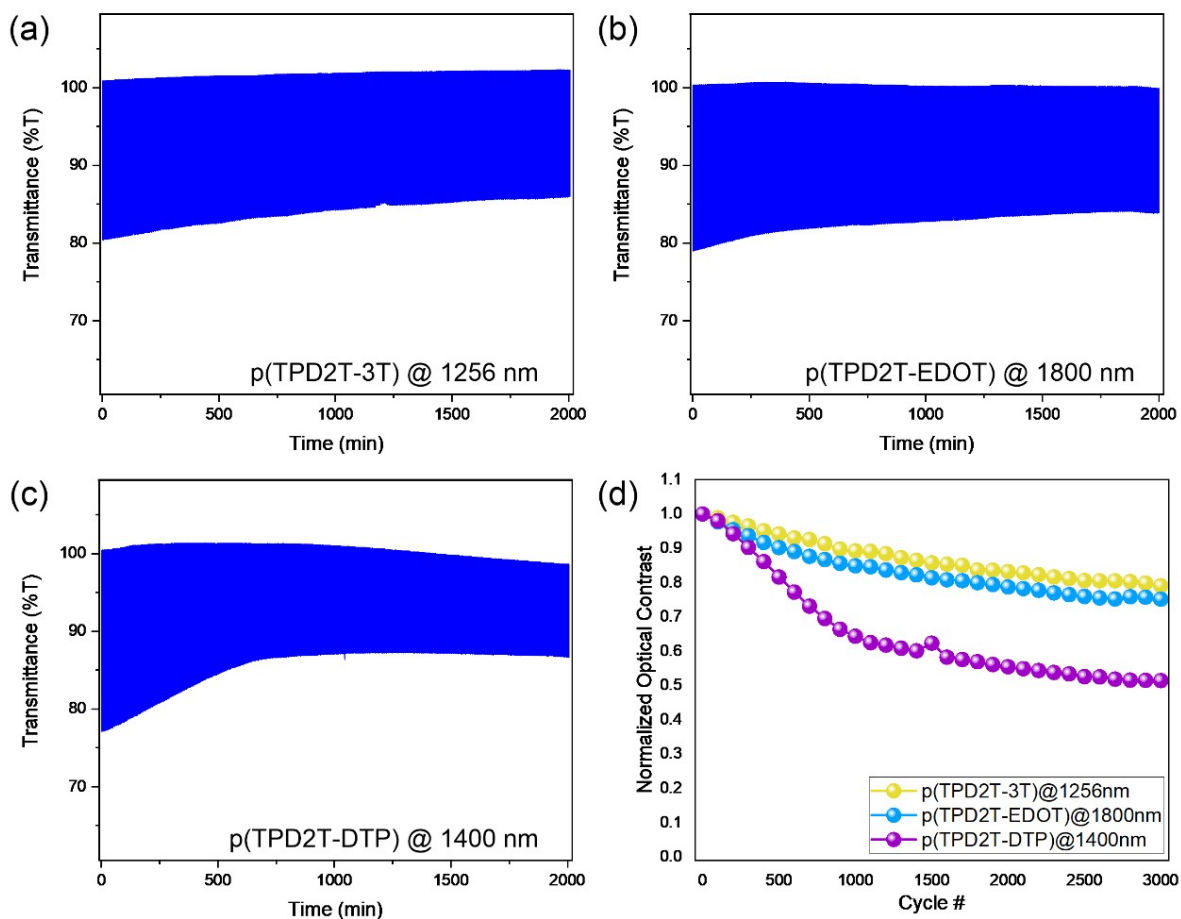

**Figure S8.** Long-term EC switching stability of (a) p(TPD2T-3T), (b) p(TPD2T-EDOT), and (c) p(TPD2T-DTP), switching at  $\pm 1.8$  V respectively, at 20 s time interval with transmittance at 1256, 1800, and 1400 nm, respectively, monitored over 3000 cycles. (d) Plot of normalized optical contrasts over number of cycles.

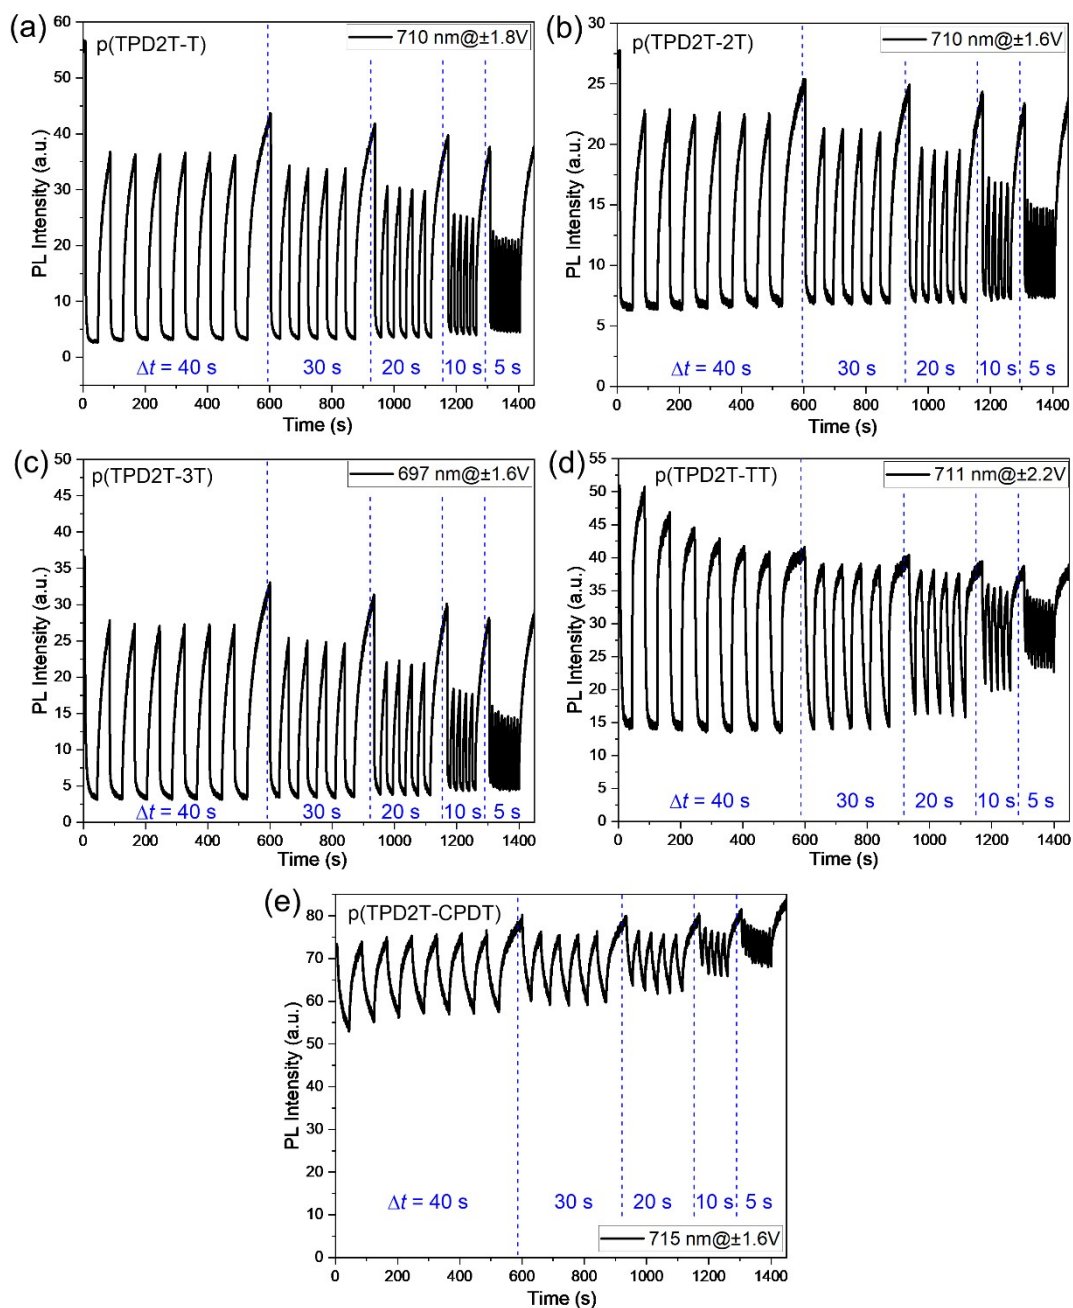

**Figure S9.** Chronofluorometry EFC switching studies for (a) p(TPD2T-T), (b) p(TPD2T-2T), (c) p(TPD2T-3T), (d) p(TPD2T-TT), and (e) p(TPD2T-CPDT), switching at 710, 710, 697, 711, and 715 nm by applying voltages of  $\pm 1.8$ ,  $\pm 1.6$ ,  $\pm 1.6$ ,  $\pm 2.2$ , and  $\pm 1.6$  V, respectively, at different time intervals ( $\Delta t$ ) of 40, 30, 20, 10, and 5 s.

**Table S3.** Prior studies of TPD-based EC conjugated polymers and their reported EC switching parameters.

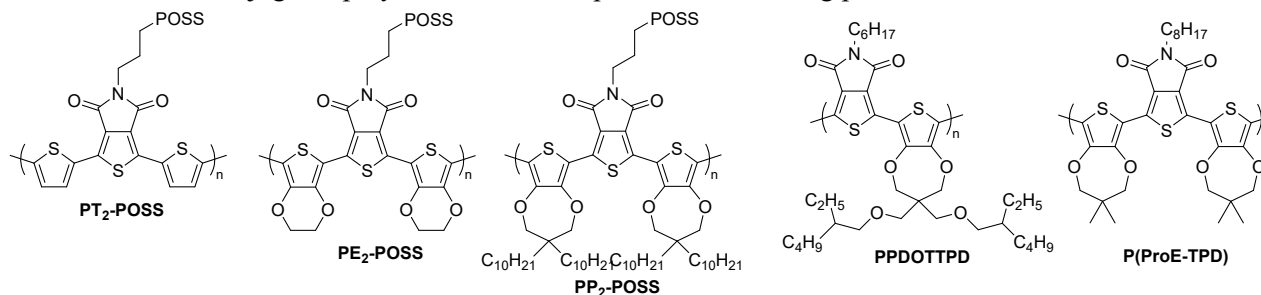

| Polymer                 | Polymerization Approach           | Neutral State               |              |              |                            |              |                                                  | Charged State               |                  |                                                                             | EC Switching                 |                          |                                          |                                    |                                            | Ref |
|-------------------------|-----------------------------------|-----------------------------|--------------|--------------|----------------------------|--------------|--------------------------------------------------|-----------------------------|------------------|-----------------------------------------------------------------------------|------------------------------|--------------------------|------------------------------------------|------------------------------------|--------------------------------------------|-----|
|                         |                                   | $\lambda_{\text{abs}}$ (nm) | HOMO (eV)    | LUMO (eV)    | $E_g$ (eV)                 | Colour       | $L^*, a^*, b^*$ values                           | $\lambda_{\text{abs}}$ (nm) | Colour           | $L^*, a^*, b^*$ values                                                      | ECD                          | % $\Delta T$             | $\tau$ (s)                               | CE ( $\text{cm}^2 \text{C}^{-1}$ ) | Stability                                  |     |
| PT <sub>2</sub> -POSS   | Electro-polymerization            | 525                         | Not Reported | Not Reported | 1.79 (Opt.); 2.29 (Elec.)  | Reddish Pink | $L^* = 75.18$<br>$a^* = 8.23$<br>$b^* = -2.09$   | 740                         | Gray             | $L^* = 82.76$<br>$a^* = 5.36$<br>$b^* = 4.90$                               | Half-cell                    | 18 (525 nm)              | 0.6 (525 nm)                             | 204 (525 nm)                       | Not Studied, $\geq$ 5 cycles               | 1   |
| PE <sub>2</sub> -POSS   | Electro-polymerization            | 540, 600                    | Not Reported | Not Reported | 1.65 (Opt.); 1.55 (Elect.) | Dark Blue    | $L^* = 53.60$<br>$a^* = 8.07$<br>$b^* = -35.27$  | 846                         | Light Blue       | $L^* = 81.05$<br>$a^* = -7.54$<br>$b^* = -7.55$                             | Half-cell                    | 46 (545 nm); 33 (600 nm) | 0.6 (545 nm); 0.6 (600 nm)               | 472 (545 nm); 387 (600 nm)         | Not Studied, $\geq$ 5 cycles               | 1   |
| PP <sub>2</sub> -POSS   | Electro-polymerization            | 585, 640                    | Not Reported | Not Reported | 1.78 (Opt.); 2.06 (Elect.) | Blue         | $L^* = 71.71$<br>$a^* = -7.54$<br>$b^* = -24.28$ | 872                         | Colourless       | $L^* = 90.98$<br>$a^* = -0.18$<br>$b^* = 0.91$                              | Half-cell                    | 50 (585 nm); 52 (640 nm) | 0.4 (585 nm); 0.4 (640 nm)               | 522 (585 nm); 550 (640 nm)         | Not Studied, $\geq$ 5 cycles               | 1   |
| PE <sub>2</sub> -POSS-C | Oxidative chemical polymerization | 632                         | Not Reported | Not Reported | 1.52 (Opt.)                | Blue         | $L^* = 77.33$<br>$a^* = -3.41$<br>$b^* = -18.46$ | Ca. 900                     | Colourless       | $L^* = 87.51$<br>$a^* = 1.10$<br>$b^* = -5.98$                              | Half-cell                    | 30                       | 0.7                                      | 954 (632 nm)                       | Not Studied, $\geq$ 5 cycles               | 1   |
| PP <sub>2</sub> -POSS-C | Oxidative chemical polymerization | 585, 640                    | Not Reported | Not Reported | 1.80 (Opt.)                | Purple-Blue  | $L^* = 70.78$<br>$a^* = 3.15$<br>$b^* = -23.42$  | Ca. 825                     | Colourless       | $L^* = 84.91$<br>$a^* = 2.95$<br>$b^* = -5.10$                              | Half-cell                    | 23                       | 1.0                                      | 995 (585 nm); 720 (640 nm)         | Not Studied, $\geq$ 5 cycles               | 1   |
| PPDOTTPD                | Stille Polymerization             | 567                         | -5.22        | -3.37        | 1.85 (Opt.)                | Purple       | $L^* = 44.02$<br>$a^* = 22.95$<br>$b^* = 36.08$  | 460, 770                    | Transparent Gray | $L^* = 66.92$<br>$a^* = \text{Not Reported}$<br>$b^* = \text{Not Reported}$ | Liquid-based sandwich device | 52 (570 nm)              | $\tau_b = 0.5$ ; $\tau_c = 0.7$ (570 nm) | 427.1                              | 200 Cycles with ca. 20% drop in $\Delta T$ | 2   |
| P(ProE-                 | Electro-                          | 565                         | Not          | Not          | Not                        | Not          | Not                                              | 800,                        | Not              | Not                                                                         | Not                          | 27.1 (1000)              | Not reported                             | Not                                | Not Studied, $\geq$                        | 3   |

| TPD)          | polymerization        |     | Reported                                 | Reported                                 | Reported    | Reported      | Reported                                         | 1380      | Reported      | Reported                                        | Reported           | nm)                           |                                                                                     | reported                         | 5 cycles                                                                    |           |
|---------------|-----------------------|-----|------------------------------------------|------------------------------------------|-------------|---------------|--------------------------------------------------|-----------|---------------|-------------------------------------------------|--------------------|-------------------------------|-------------------------------------------------------------------------------------|----------------------------------|-----------------------------------------------------------------------------|-----------|
| p(TPD2T-T)    | Stille Polymerization | 510 | -5.77 <sup>a</sup><br>-5.34 <sup>b</sup> | -4.00 <sup>a</sup><br>-3.57 <sup>b</sup> | 1.77 (Opt.) | Light Grey    | $L^* = 92.48$<br>$a^* = 4.61$<br>$b^* = 0.89$    | 1242      | Dark Grey     | $L^* = 93.01$<br>$a^* = 2.89$<br>$b^* = -0.54$  | Sandwich Full Cell | 19.8 (492 nm); 27.4 (1242 nm) | $t_b = 3.7; t_c = 11.5$ (492 nm);<br>$t_b = 19.9; t_c = 6.1$ (1242 nm)              | 349.6 (492 nm); 200 (1242 nm)    | -                                                                           | This Work |
| p(TPD2T-2T)   | Stille Polymerization | 494 | -5.59 <sup>a</sup><br>-5.21 <sup>b</sup> | -3.80 <sup>a</sup><br>-3.42 <sup>b</sup> | 1.79 (Opt.) | Brown         | $L^* = 87.57$<br>$a^* = 6.89$<br>$b^* = 1.23$    | 1200      | Grey          | $L^* = 88.49$<br>$a^* = 2.43$<br>$b^* = -3.88$  | Sandwich Full Cell | 12.4 (490 nm); 20.2 (1196 nm) | $\tau_b = 10.4; \tau_c = 27.3$ (490 nm);<br>$\tau_b = 23.8; \tau_c = 3.4$ (1196 nm) | 207.5 (490 nm); 293.3 (1196 nm)  | -                                                                           | This Work |
| p(TPD2T-3T)   | Stille Polymerization | 498 | -5.35 <sup>a</sup><br>-5.43 <sup>b</sup> | -3.57 <sup>a</sup><br>-3.65 <sup>b</sup> | 1.78 (Opt.) | Magenta Brown | $L^* = 84.96$<br>$a^* = 10.79$<br>$b^* = -4.2$   | 1200      | Bluish Grey   | $L^* = 88.99$<br>$a^* = 0.23$<br>$b^* = -4.73$  | Sandwich Full Cell | 17.5 (520 nm); 42.1 (1256 nm) | $\tau_b = 3.0; \tau_c = 16.7$ (520 nm);<br>$\tau_b = 17.9; \tau_c = 2.3$ (1256 nm)  | 377.3 (520 nm); 630.2 (1256 nm)  | 3000 cycles with 15.1% loss at 1000th cycle and 24.8% loss at 3000th cycles | This Work |
| p(TPD2T-TT)   | Stille Polymerization | 520 | -5.65 <sup>a</sup><br>-5.31 <sup>b</sup> | -3.86 <sup>a</sup><br>-3.52 <sup>b</sup> | 1.79 (Opt.) | Reddish Brown | $L^* = 86.19$<br>$a^* = 12.18$<br>$b^* = 1.07$   | 1235      | Purplish Grey | $L^* = 87.85$<br>$a^* = 3.57$<br>$b^* = -3.60$  | Sandwich Full Cell | 17.7 (497 nm); 30.4 (1238 nm) | $\tau_b = 3.1; \tau_c = 24.4$ (497 nm);<br>$\tau_b = 27.4; \tau_c = 2.1$ (1238 nm)  | 275.1 (497 nm); 340.4 (1238 nm)  | -                                                                           | This Work |
| p(TPD2T-EDOT) | Stille Polymerization | 537 | -5.39 <sup>a</sup><br>-5.17 <sup>b</sup> | -3.73 <sup>a</sup><br>-3.51 <sup>b</sup> | 1.66 (Opt.) | Greyish Blue  | $L^* = 81.49$<br>$a^* = 0.79$<br>$b^* = -13.36$  | 830, 1825 | Grey          | $L^* = 89.00$<br>$a^* = 0.46$<br>$b^* = -5.13$  | Sandwich Full Cell | 23.8 (595 nm); 46.7 (1800 nm) | $\tau_b = 1.7; \tau_c = 9.0$ (595 nm);<br>$\tau_b = 11.9; \tau_c = 1.3$ (1800 nm)   | 720.7 (595 nm); 1012.1 (1800 nm) | 3000 cycles with 10.7% loss at 1000th cycle and 20.9% loss at 3000th cycles | This Work |
| p(TPD2T-DTP)  | Stille Polymerization | 565 | -5.22 <sup>a</sup><br>-5.34 <sup>b</sup> | -3.63 <sup>a</sup><br>-3.75 <sup>b</sup> | 1.59 (Opt.) | Dark Blue     | $L^* = 76.93$<br>$a^* = -3.23$<br>$b^* = -17.95$ | 755, 1400 | Bluish Grey   | $L^* = 87.36$<br>$a^* = -2.95$<br>$b^* = -5.56$ | Sandwich Full Cell | 20.0 (608 nm); 44.8 (1400 nm) | $\tau_b = 0.7; \tau_c = 4.3$ (608 nm);<br>$\tau_b = 6.8; \tau_c = 1.2$ (1400 nm)    | 801.1 (608 nm); 1358.5 (1400 nm) | 3000 cycles with 35.6% loss at 1000th cycle and 48.5% loss at 3000th cycles | This Work |
| p(TPD2T-CPDT) | Stille Polymerization | 558 | -5.32 <sup>a</sup><br>-5.21 <sup>b</sup> | -3.51 <sup>a</sup><br>-3.40 <sup>b</sup> | 1.81 (Opt.) | Purple        | $L^* = 76.67$<br>$a^* = 4.68$<br>$b^* = -11.06$  | 800, 1450 | Grey          | $L^* = 85.94$<br>$a^* = 0.06$<br>$b^* = -2.08$  | Sandwich Full Cell | 18.1 (555 nm); 23.7 (1380 nm) | $\tau_b = 9.6; \tau_c = 36.1$ (555 nm);<br>$\tau_b = 46.4; \tau_c = 3.6$ (1380 nm)  | 245.9 (555 nm); 247.6 (1380 nm)  | -                                                                           | This Work |

<sup>a</sup> Measured from solution-based CV; <sup>b</sup> measured from thin film-based CV.

#### References:

1. Deniz Çakal, Atilla Cihaner, Ahmet M. Önal, *Electrochimica Acta* (2021) 377, 138064 (DOI: 10.1016/j.electacta.2021.138064)
2. Peiyu Wu, Shengxiong Zhang, Wenjun Zhang, Weijie Song, *Dyes and Pigments* (2023) 219, 111566 (DOI: 10.1016/j.dyepig.2023.111566)
3. Zhe Xu, Shouyi Ming, Teng Zhang, Meijing Li, Shijie Zhen, *Luminescence* (2024), 39, e4843 (DOI: 10.1002/bio.4843)

## ANNEX

$^1\text{H}$  NMR of 1,3-bis(4-dodecylthiophen-2-yl)-5-(2-ethylhexyl)-4H-thieno[3,4-c]pyrrole-4,6(5H)-dione (2):

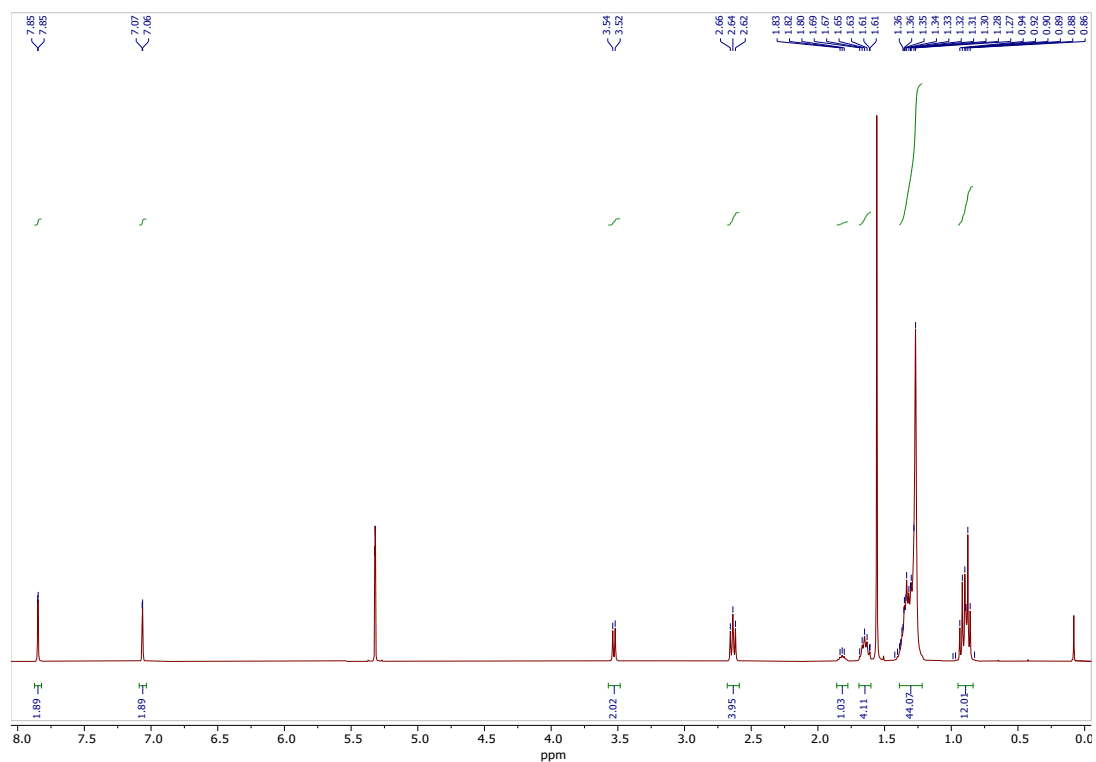

$^{13}\text{C}$  NMR of 1,3-bis(4-dodecylthiophen-2-yl)-5-(2-ethylhexyl)-4H-thieno[3,4-c]pyrrole-4,6(5H)-dione (2):

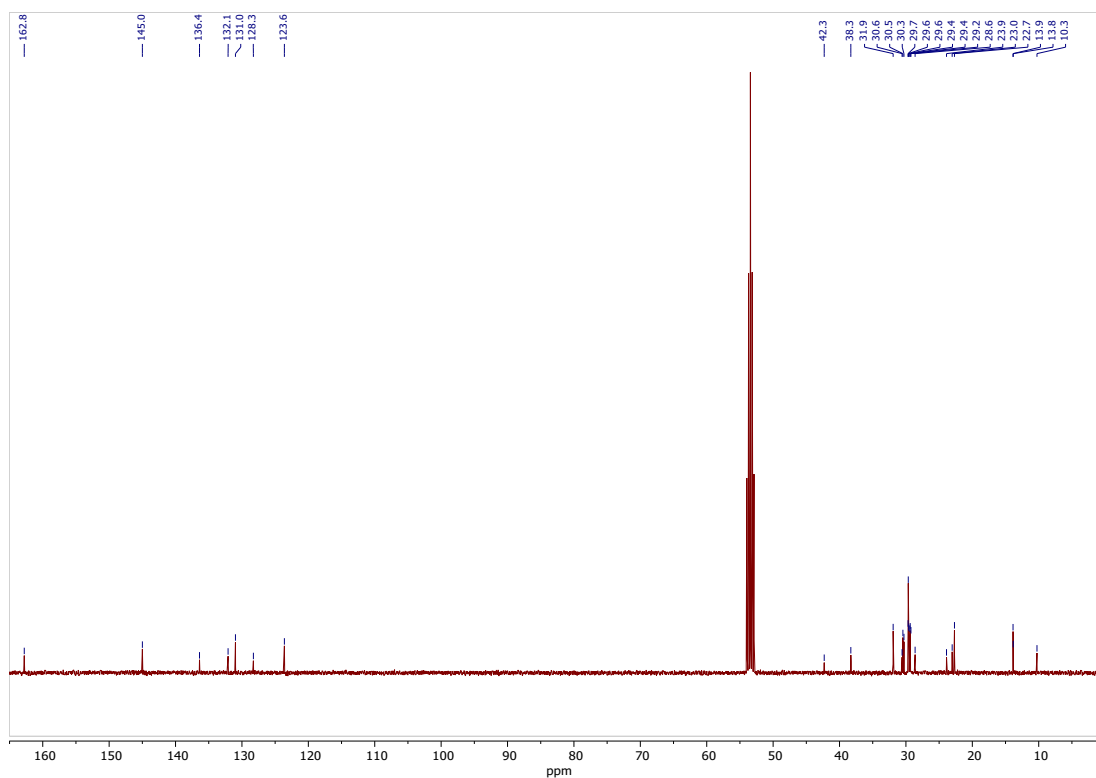

$^1\text{H}$  NMR of 1,3-bis(5-bromo-4-dodecylthiophen-2-yl)-5-(2-ethylhexyl)-4H-thieno[3,4-c]pyrrole-4,6(5H)-dione (**3**):

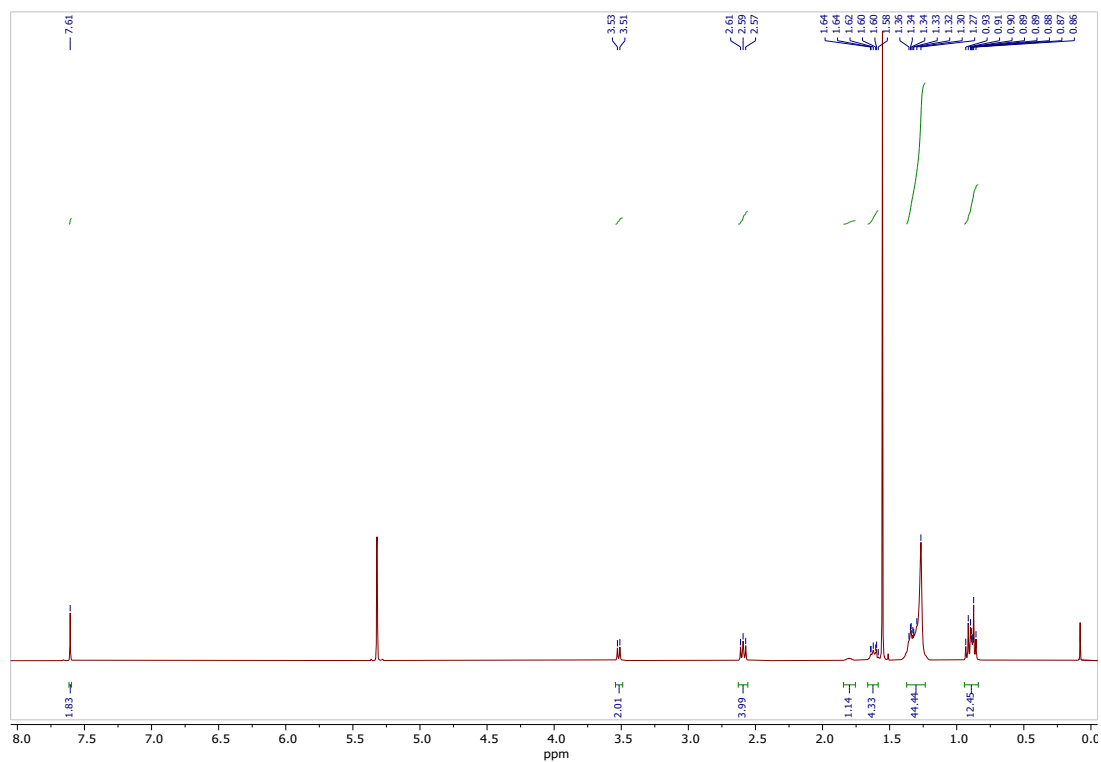

$^{13}\text{C}$  NMR of 1,3-bis(5-bromo-4-dodecylthiophen-2-yl)-5-(2-ethylhexyl)-4H-thieno[3,4-c]pyrrole-4,6(5H)-dione (**3**):

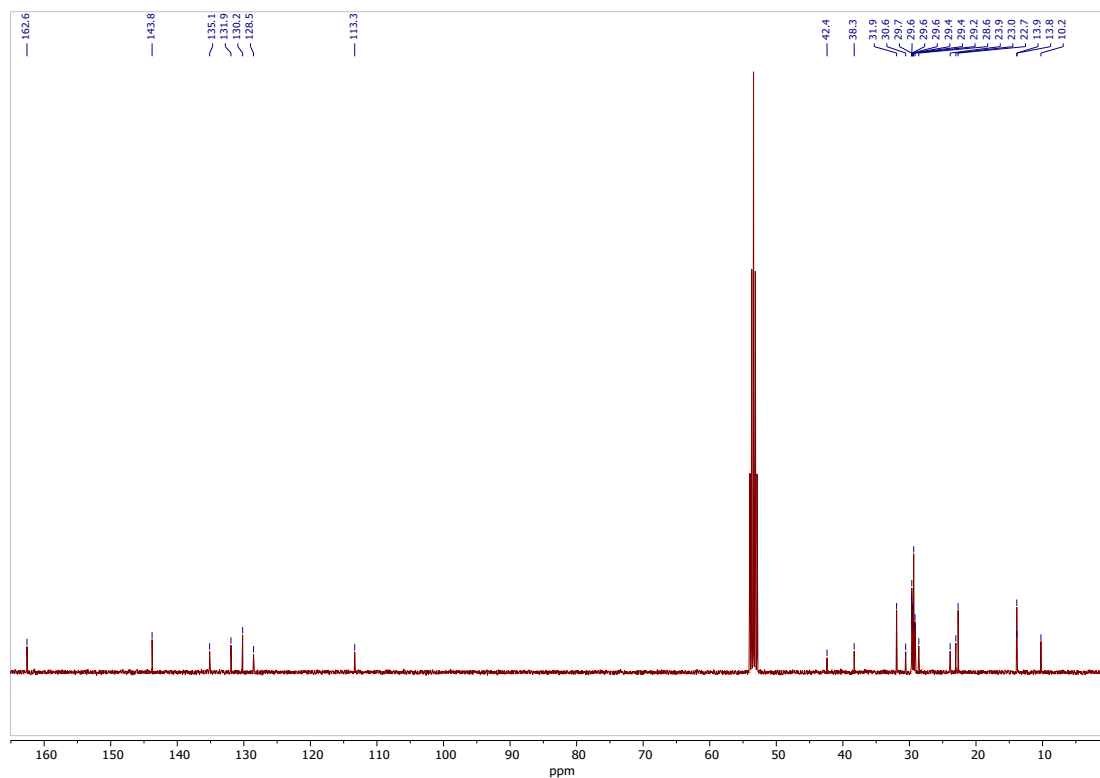

$^1\text{H}$  NMR of p(TPD2T-T) in  $\text{CDCl}_3$

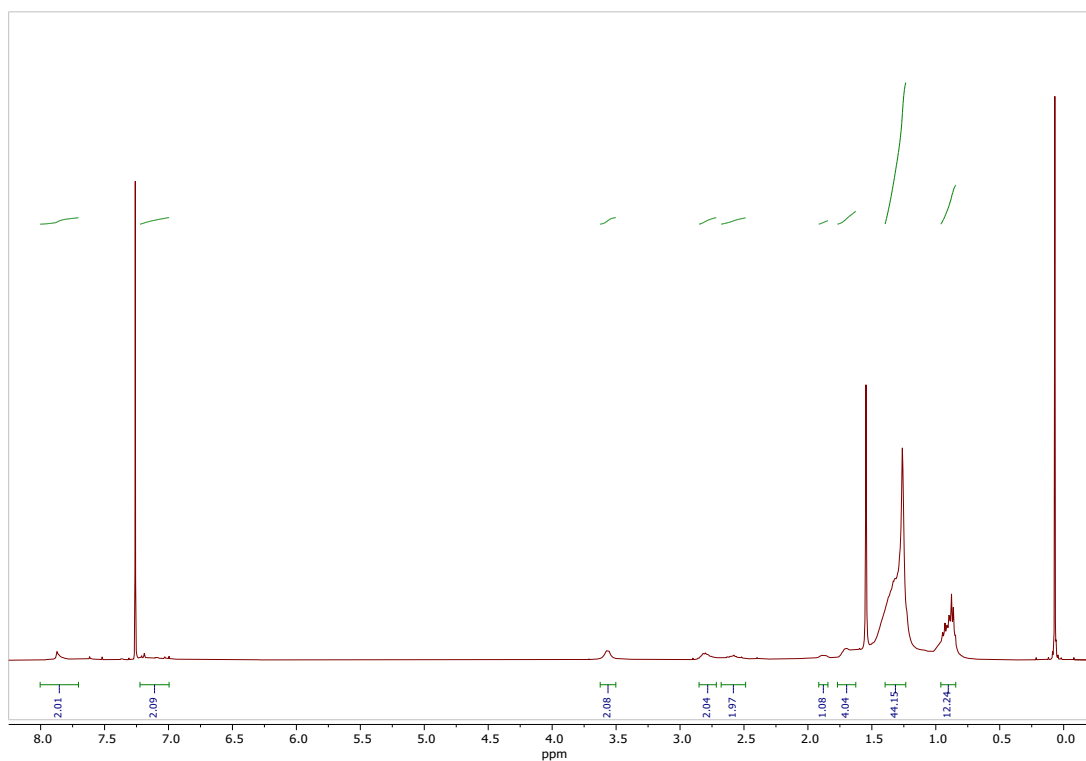

$^1\text{H}$  NMR of p(TPD2T-T) in Toluene- $\text{D}_8$

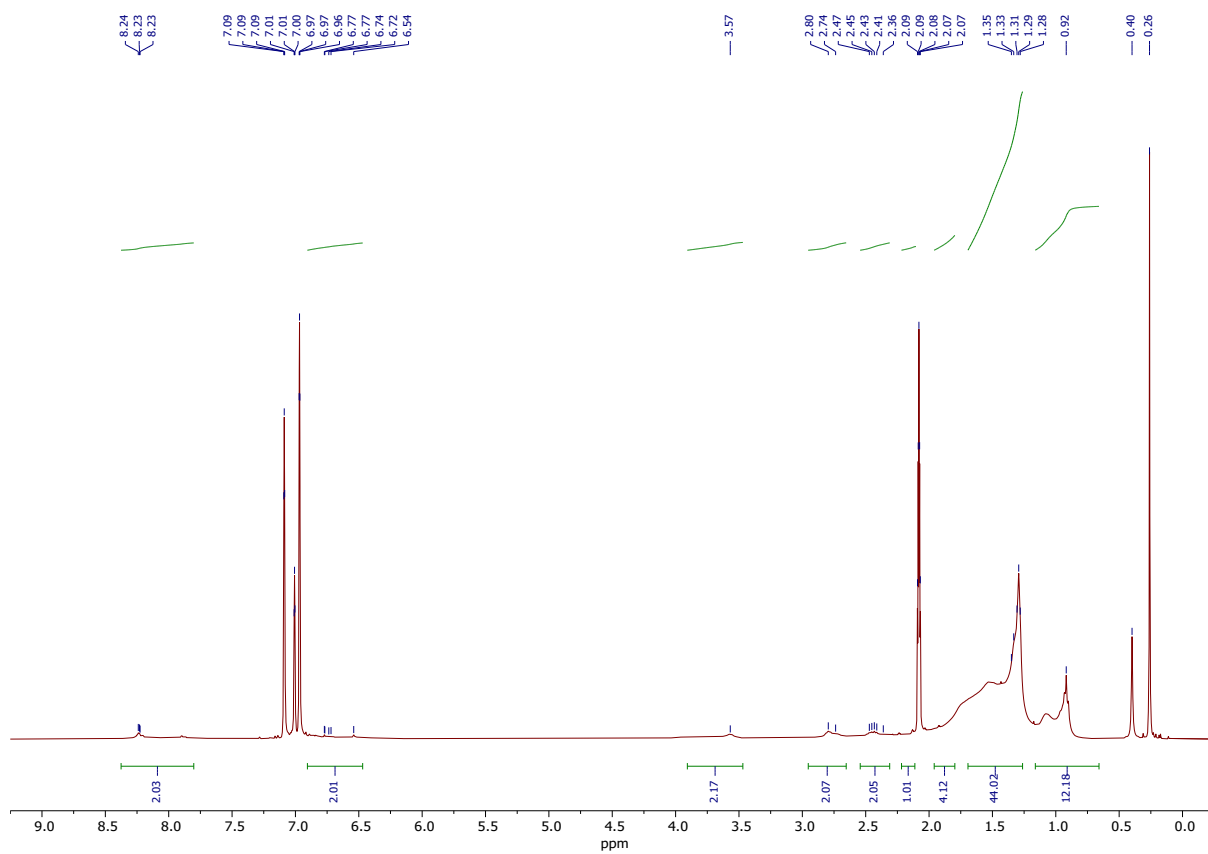

$^1\text{H}$  NMR of p(TPD2T-2T) in  $\text{CDCl}_3$

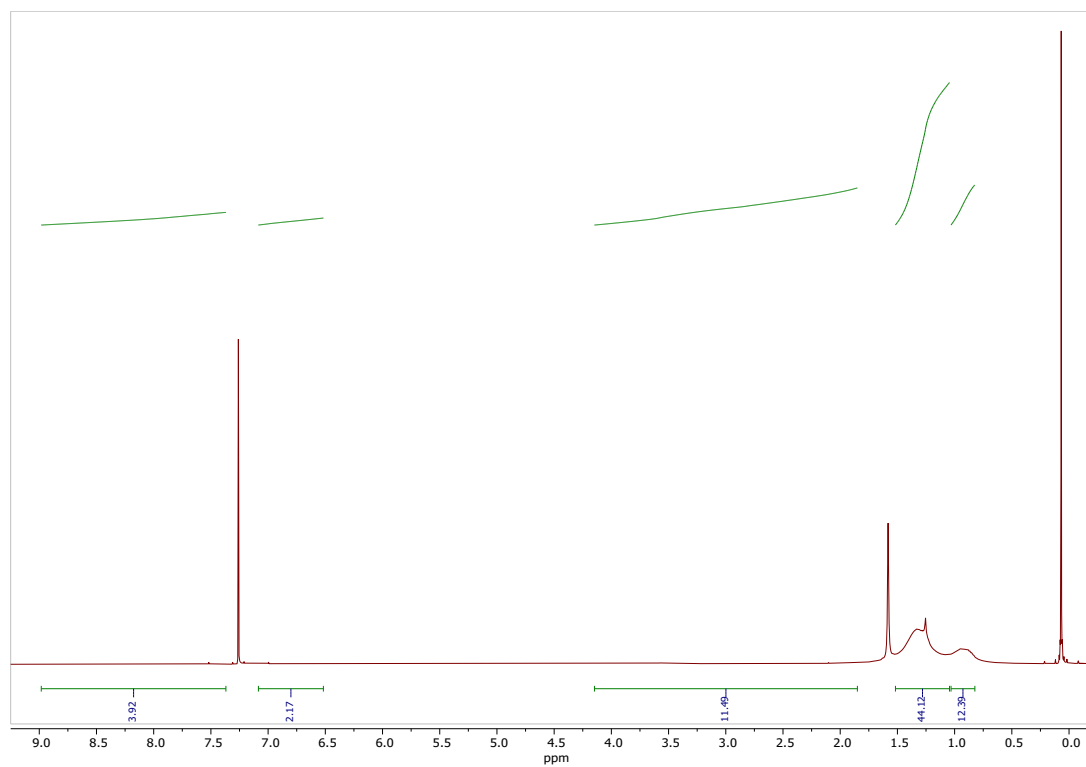

$^1\text{H}$  NMR of p(TPD2T-2T) in Toluene- $\text{D}_8$

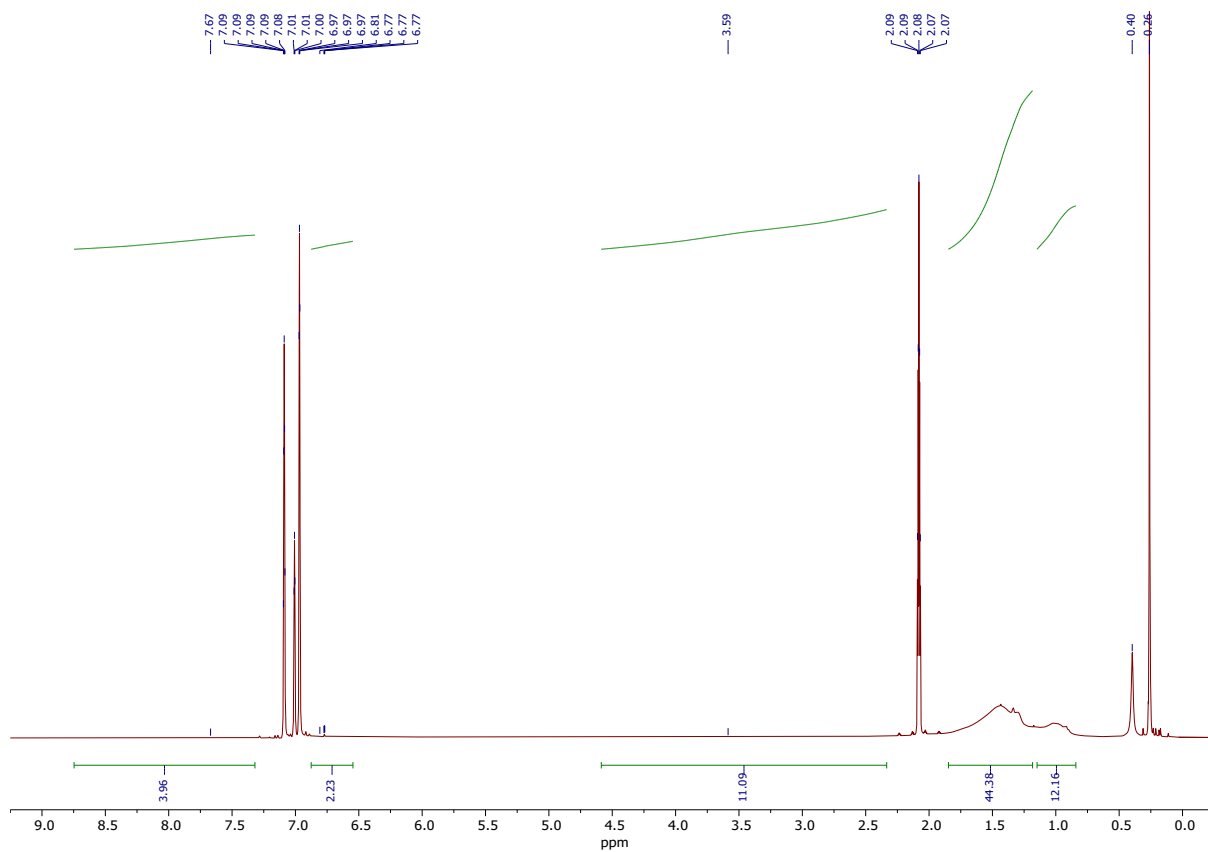

$^1\text{H}$  NMR of p(TPD2T-3T) in  $\text{CDCl}_3$

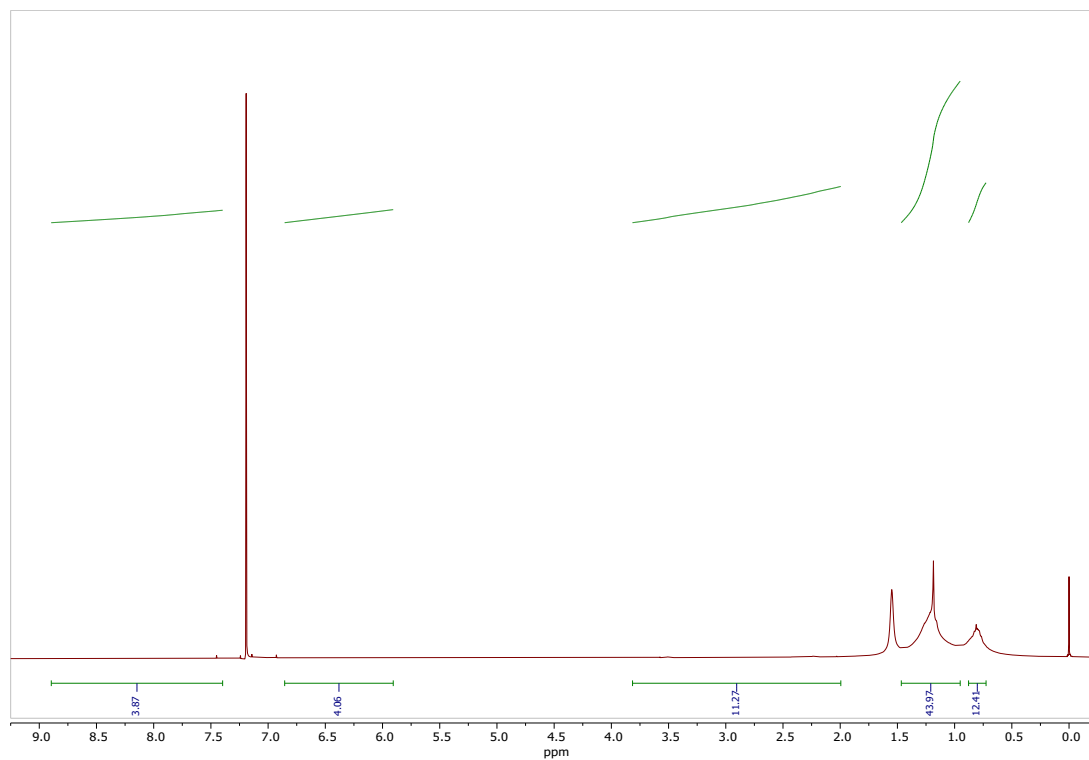

$^1\text{H}$  NMR of p(TPD2T-3T) in Toluene- $\text{D}_8$

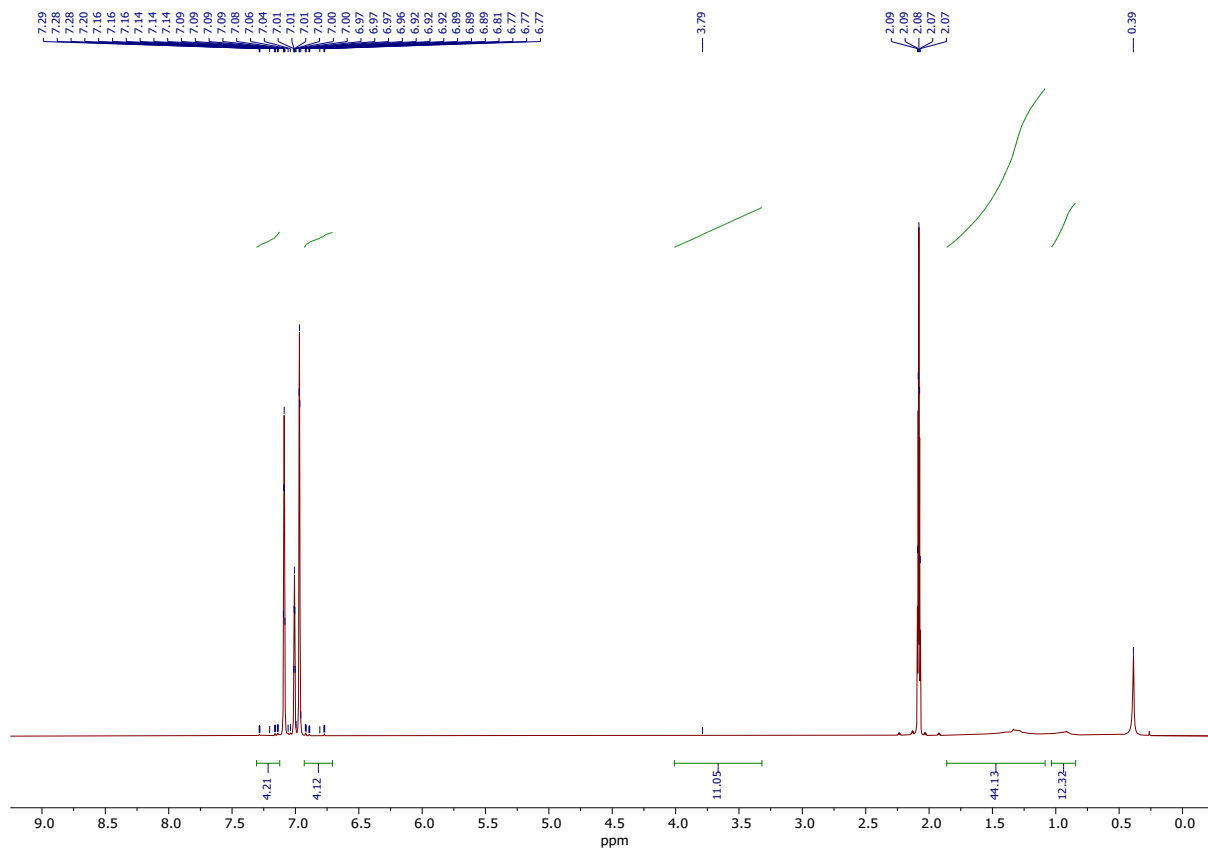

$^1\text{H}$  NMR of p(TPD2T-TT) in  $\text{CDCl}_3$

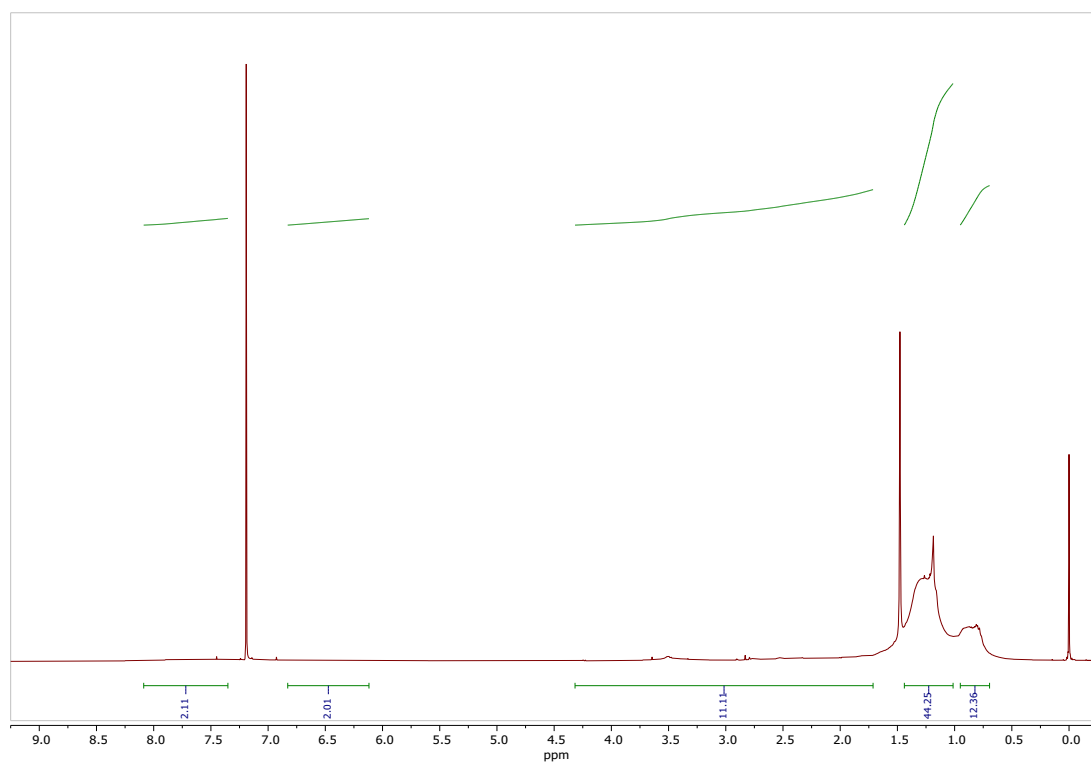

$^1\text{H}$  NMR of p(TPD2T-TT) in Toluene- $\text{D}_8$

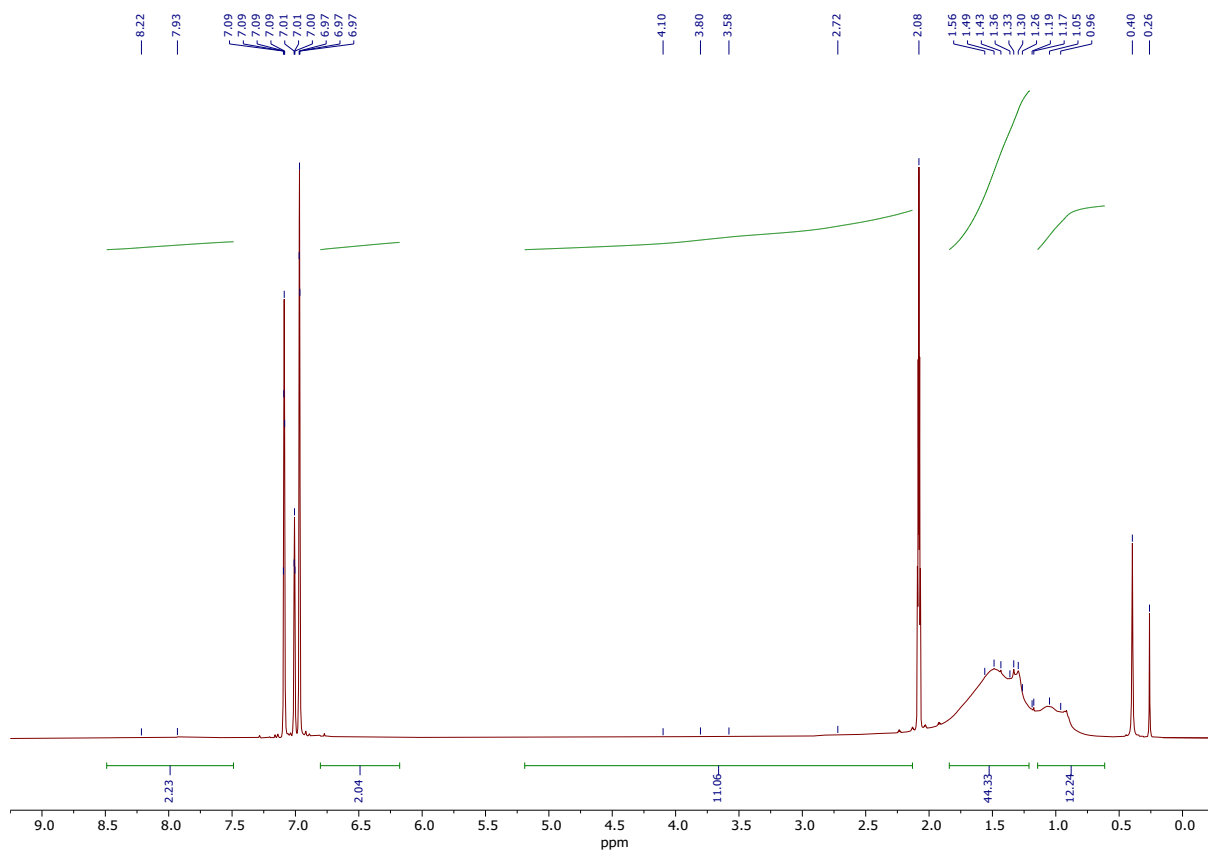

$^1\text{H}$  NMR of p(TPD2T-EDOT) in  $\text{CDCl}_3$

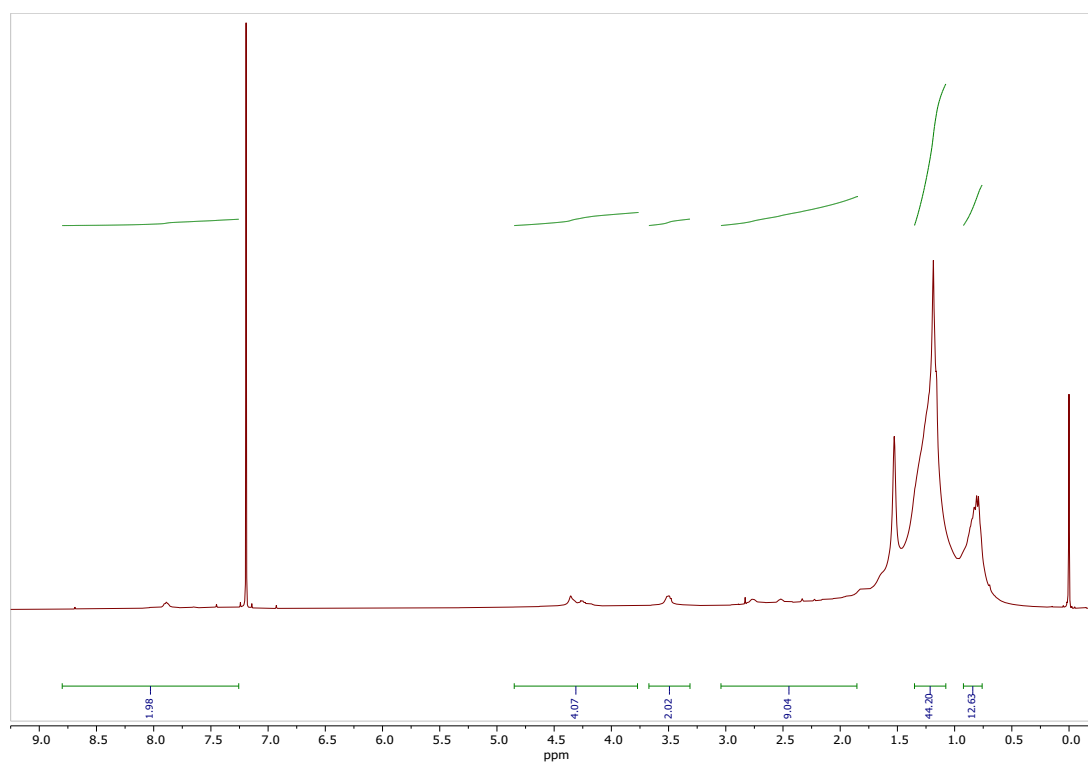

$^1\text{H}$  NMR of p(TPD2T-EDOT) in Toluene- $\text{D}_8$

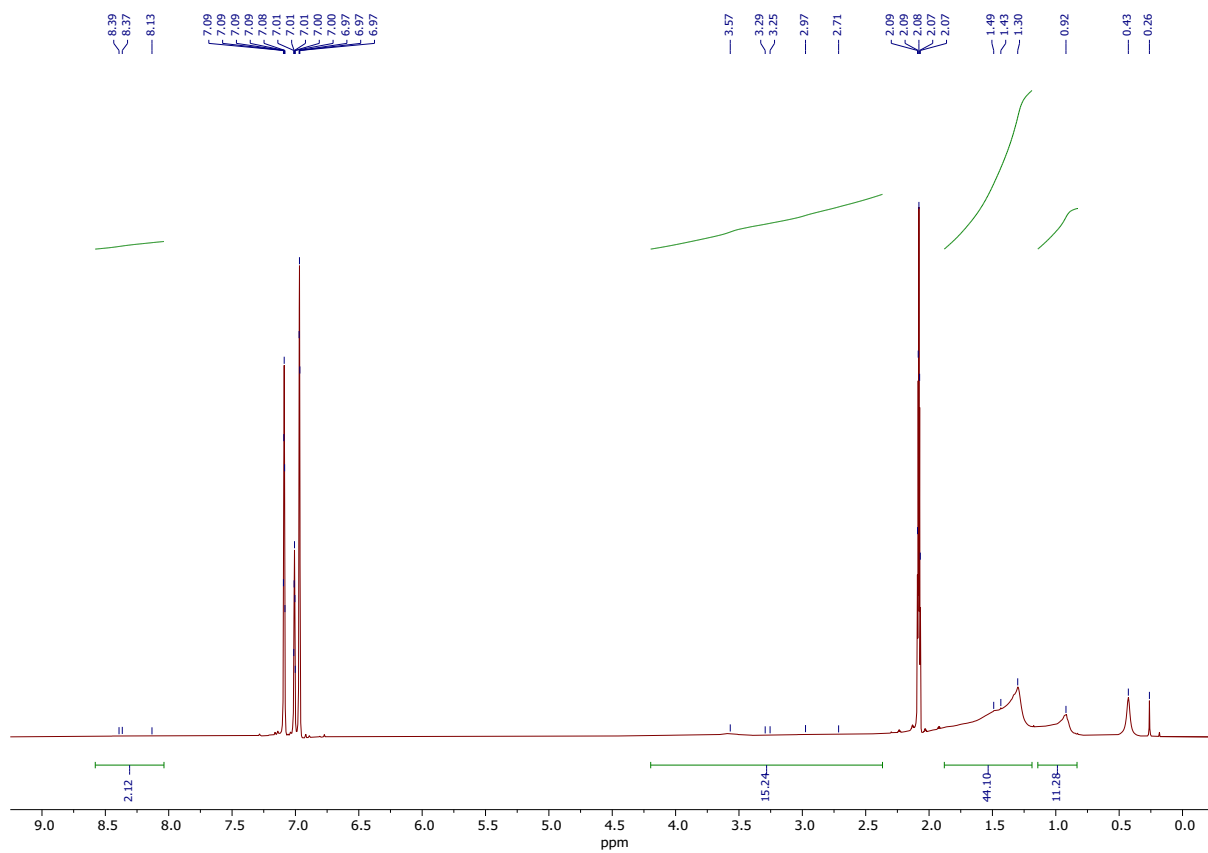

$^1\text{H}$  NMR of p(TPD2T-DTP) in  $\text{CDCl}_3$

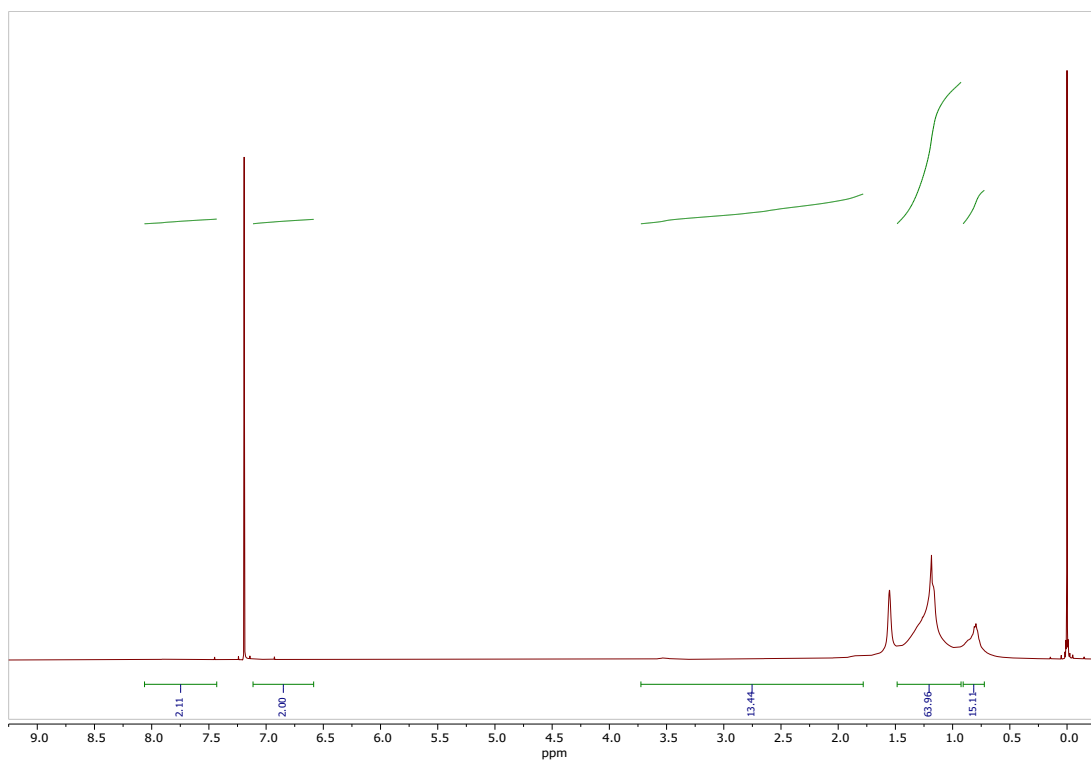

$^1\text{H}$  NMR of p(TPD2T-DTP) in Toluene- $\text{D}_8$

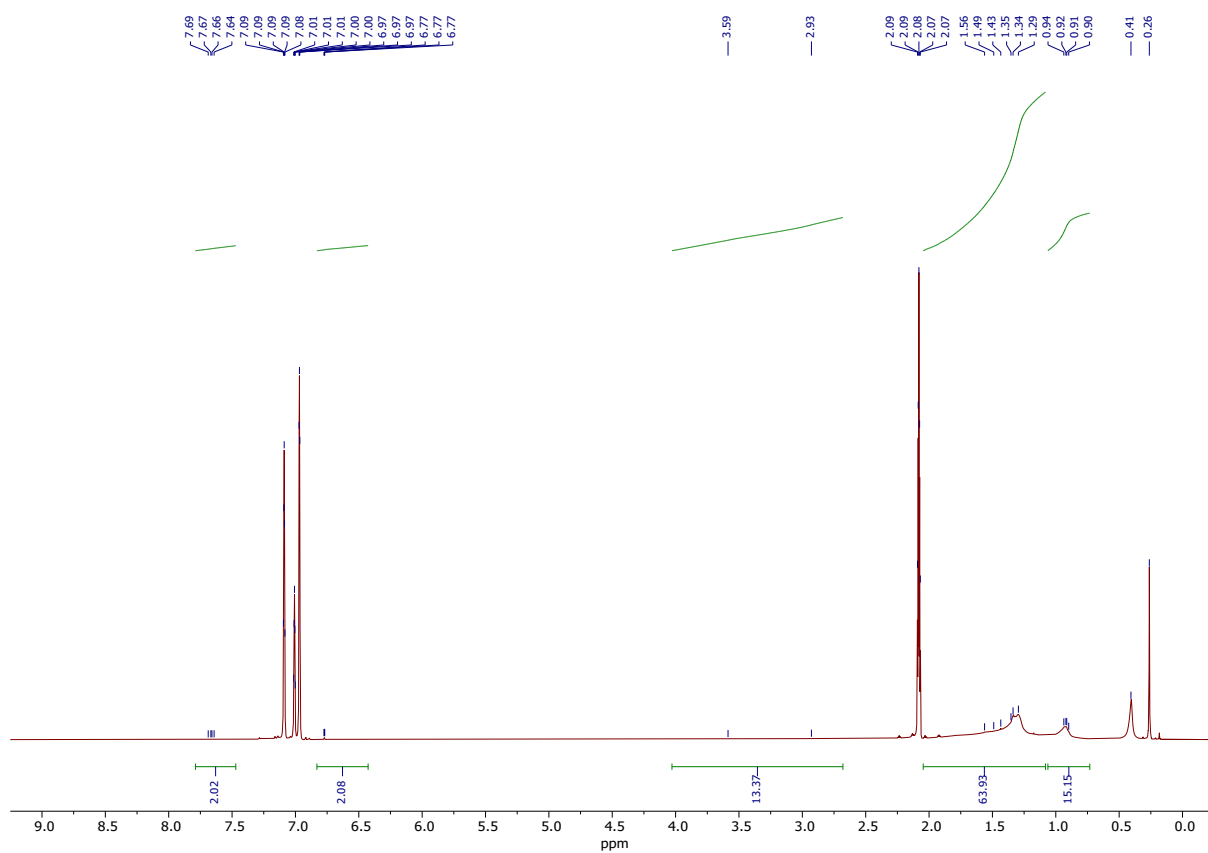

$^1\text{H}$  NMR of p(TPD2T-CPDT) in  $\text{CDCl}_3$

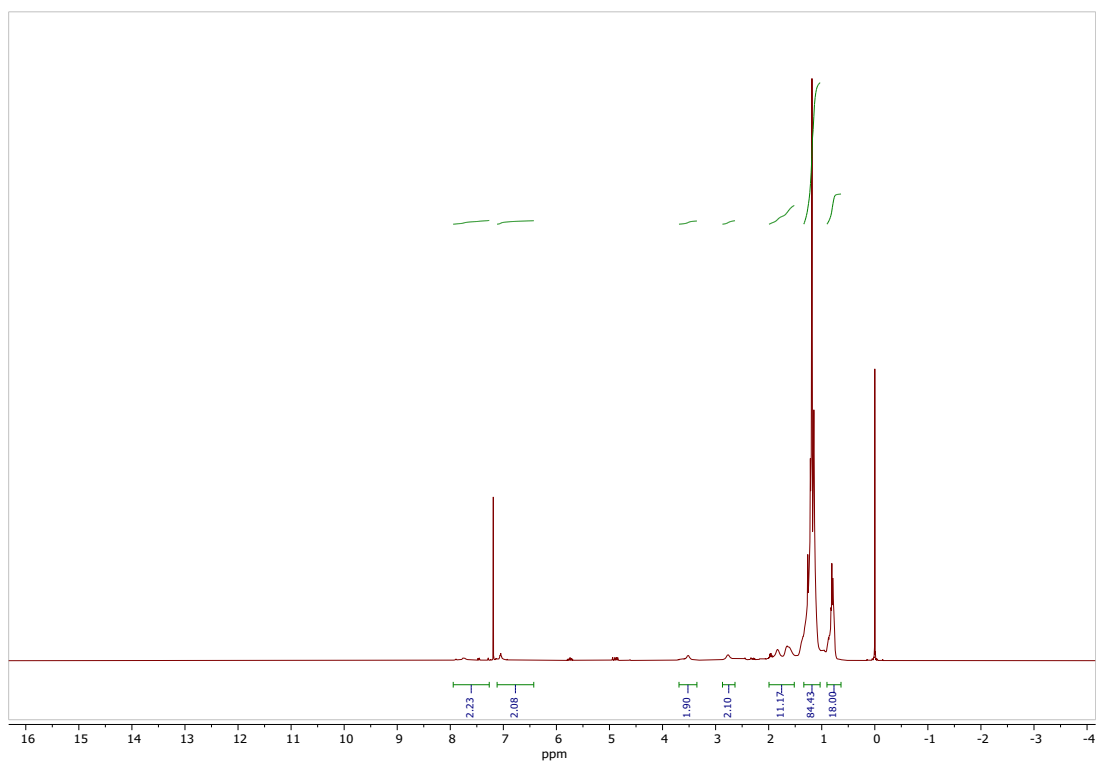

$^1\text{H}$  NMR of p(TPD2T-CPDT) in Toluene- $\text{D}_8$

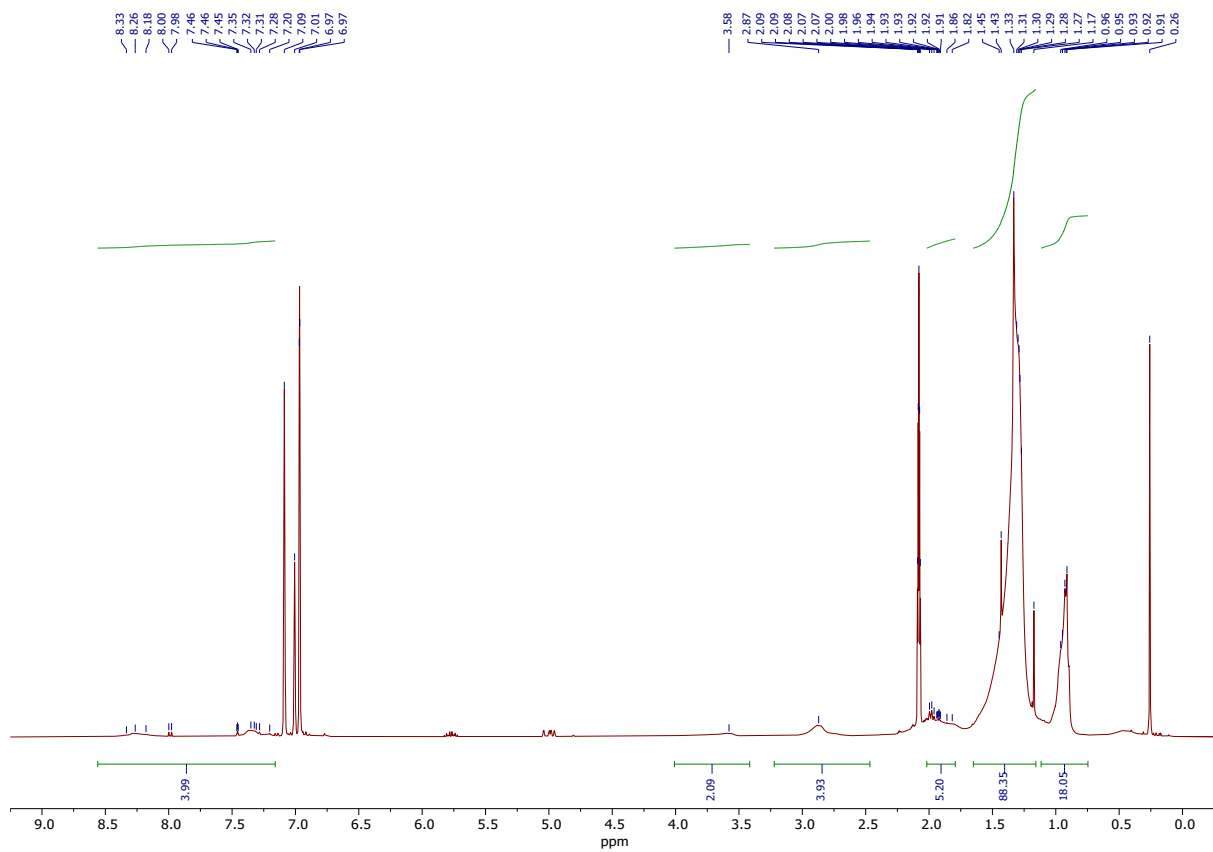

### <sup>1</sup>H NMR of p(TPD2T-CPDT)

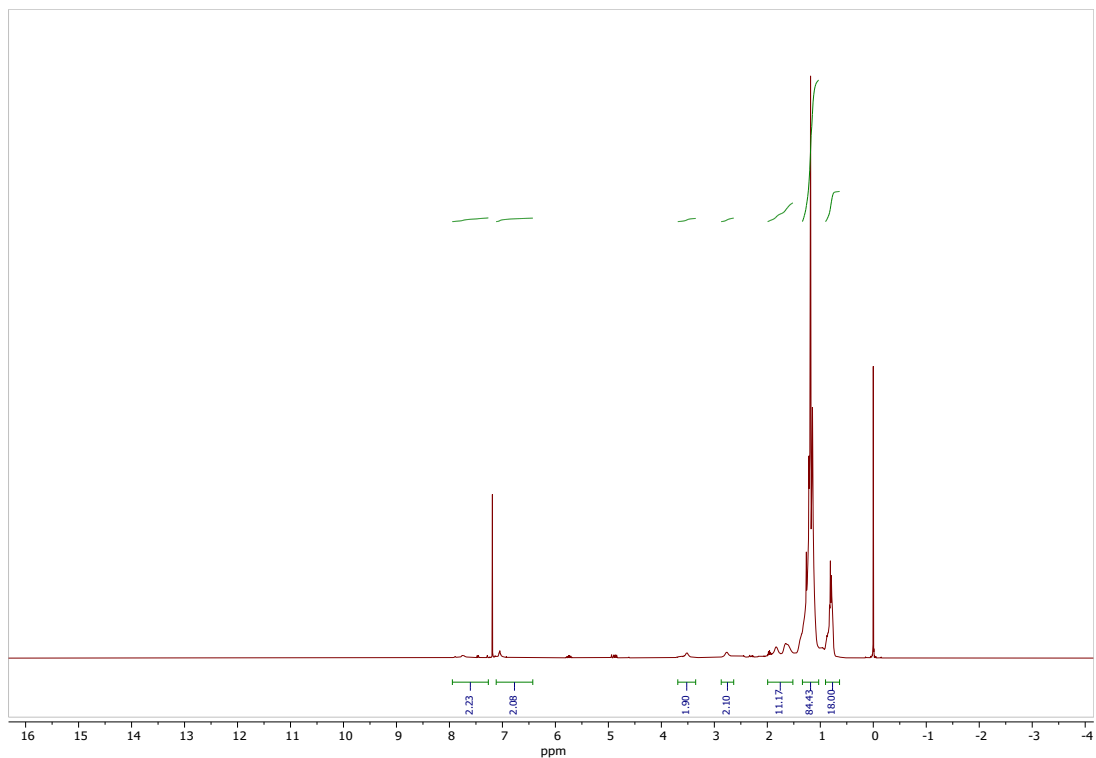

### FTIR Spectra of p(TPD2T-T)

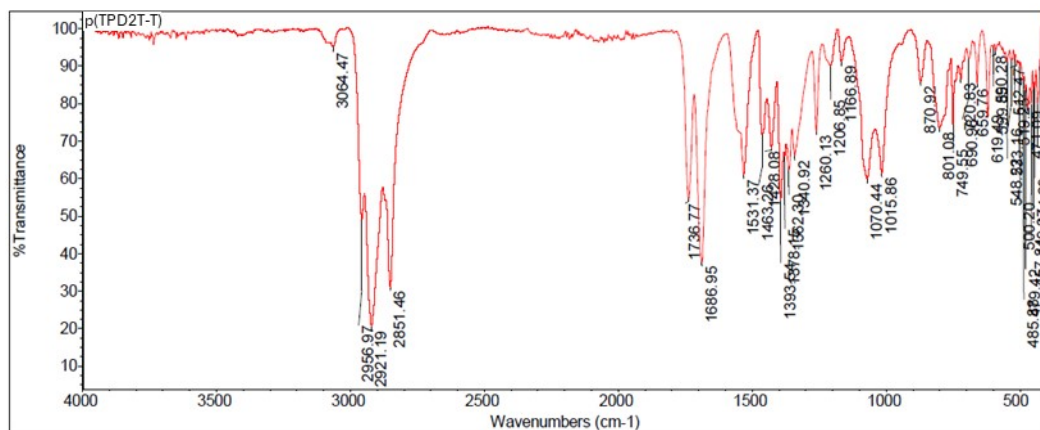

### FTIR Spectra of p(TPD2T-2T)

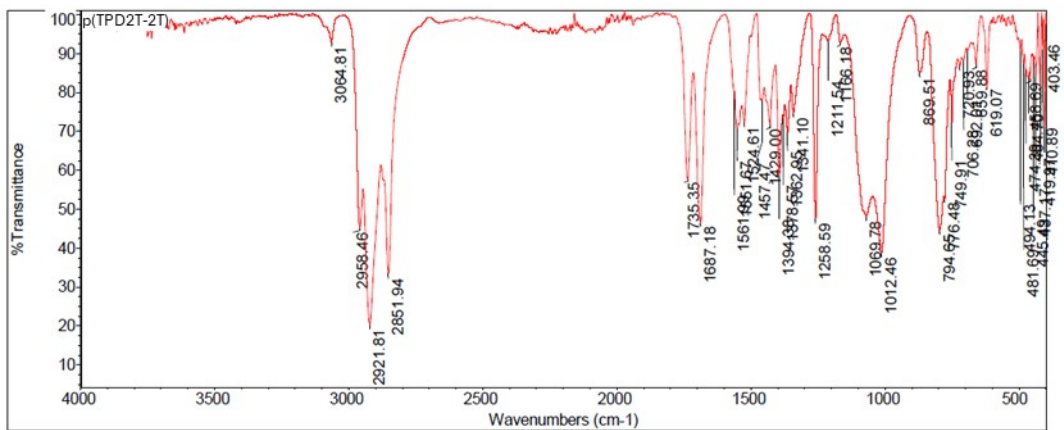

FTIR Spectra of p(TPD2T-3T)

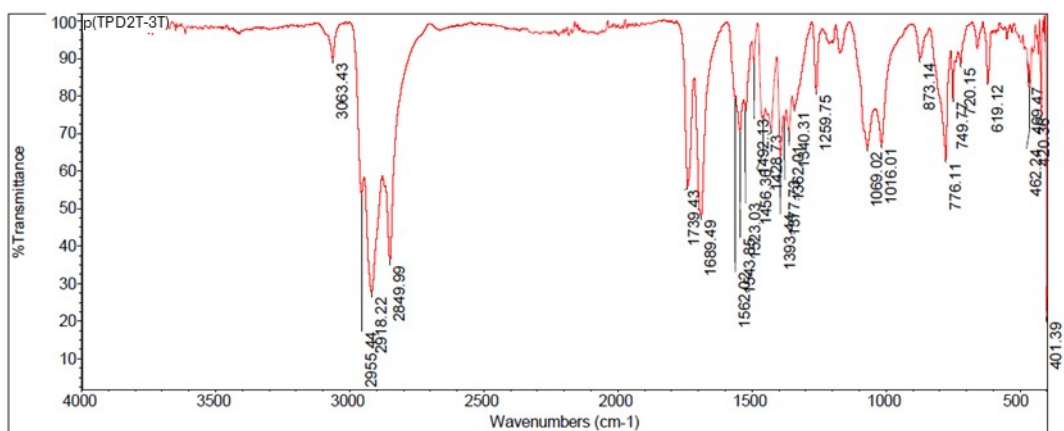

FTIR Spectra of p(TPD2T-TT)

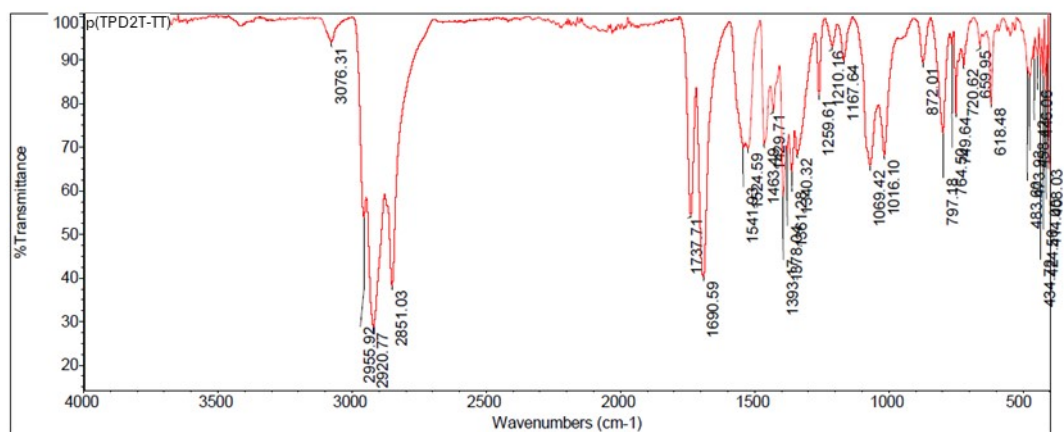

FTIR Spectra of p(TPD2T-EDOT)

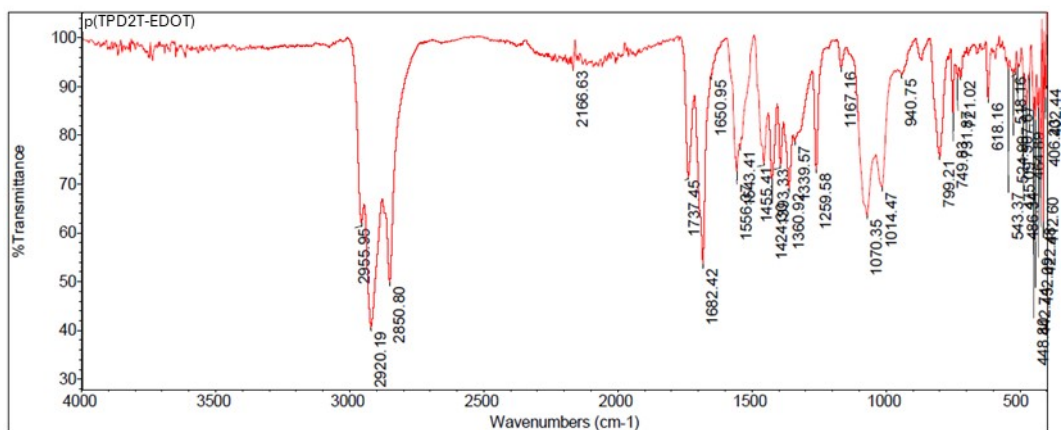

FTIR Spectra of p(TPD2T-DTP)

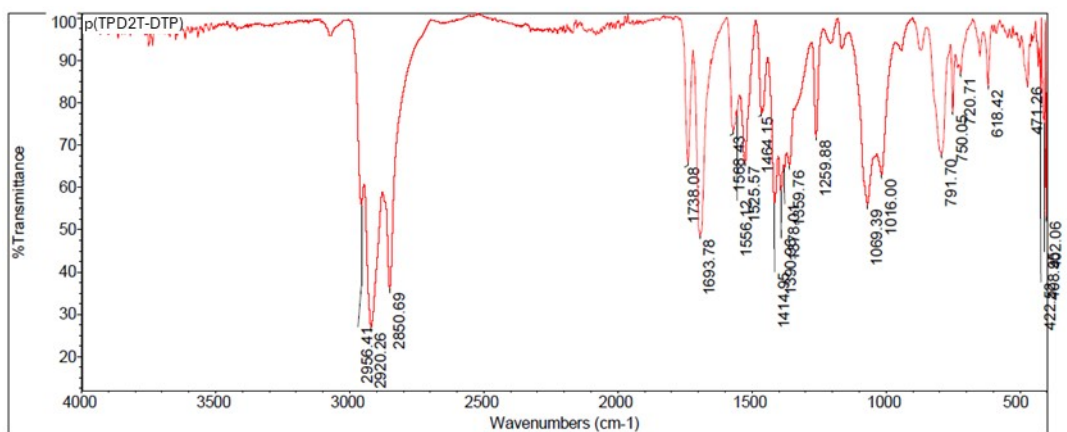

FTIR Spectra of p(TPD2T-CPDT)

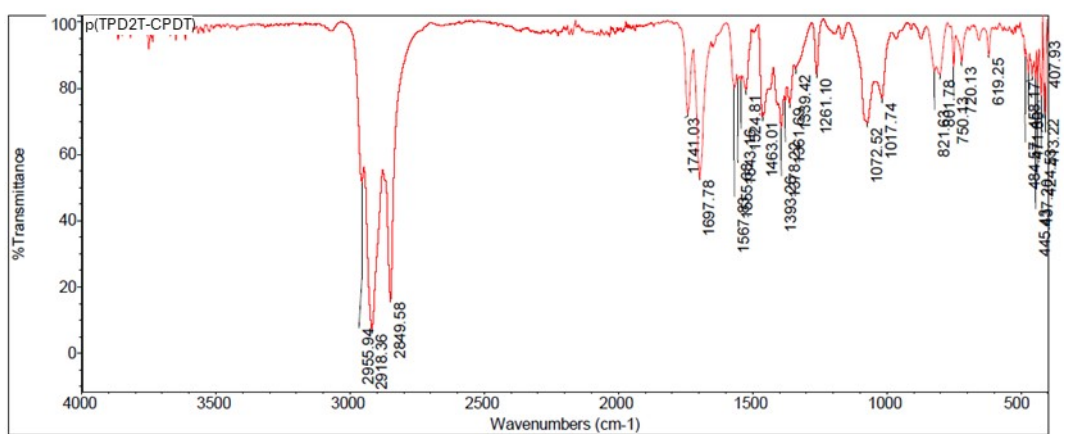

GPC Chromatogram of p(TPD2T-T)

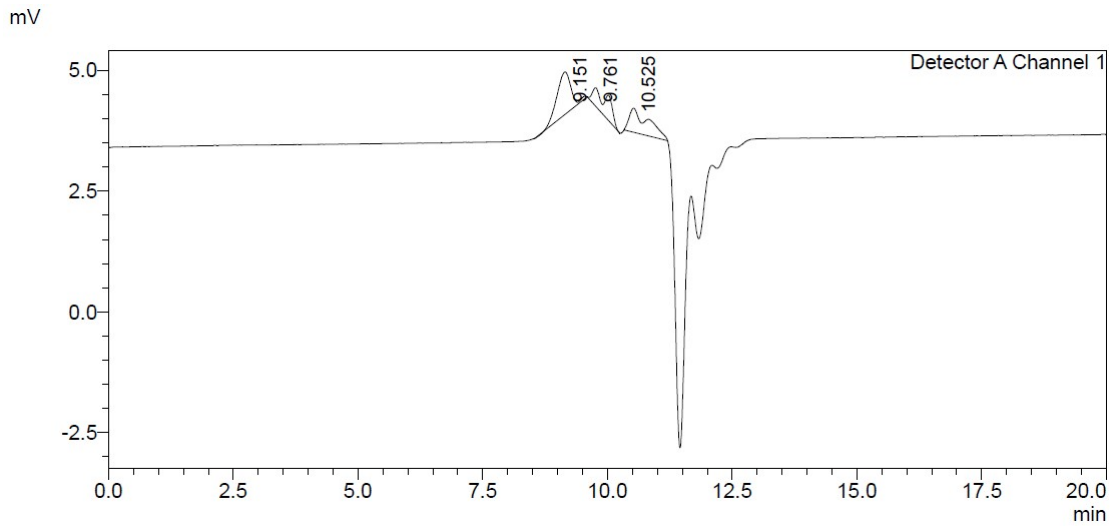

GPC Chromatogram of p(TPD2T-2T)

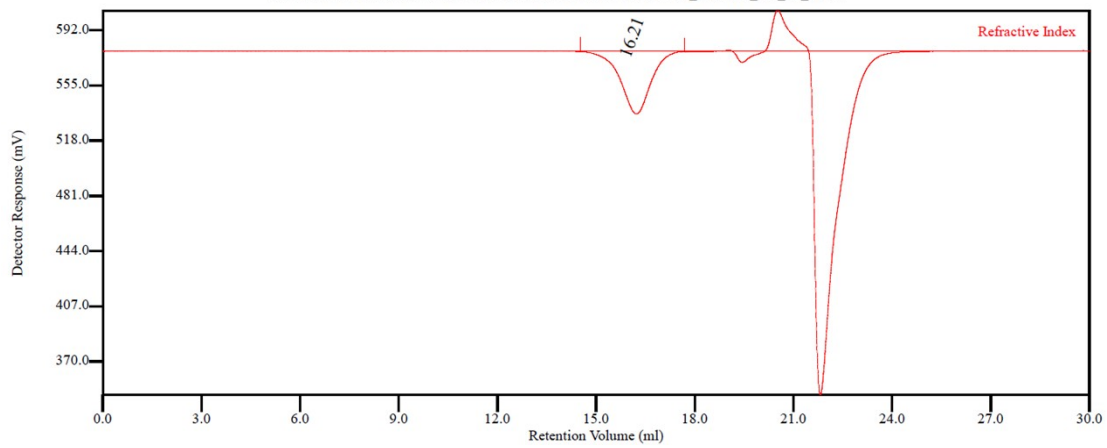

GPC Chromatogram of p(TPD2T-3T)

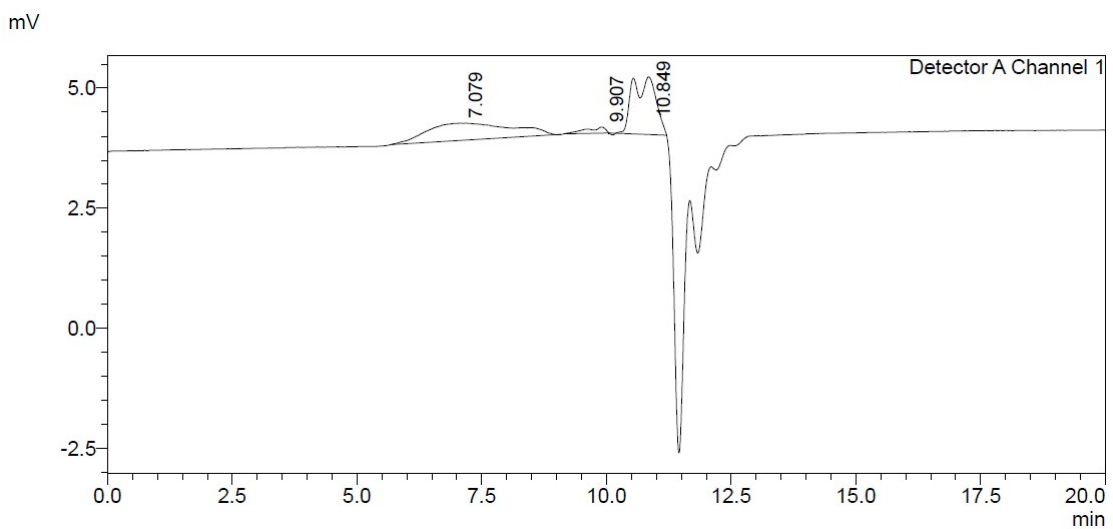

GPC Chromatogram of p(TPD2T-TT)

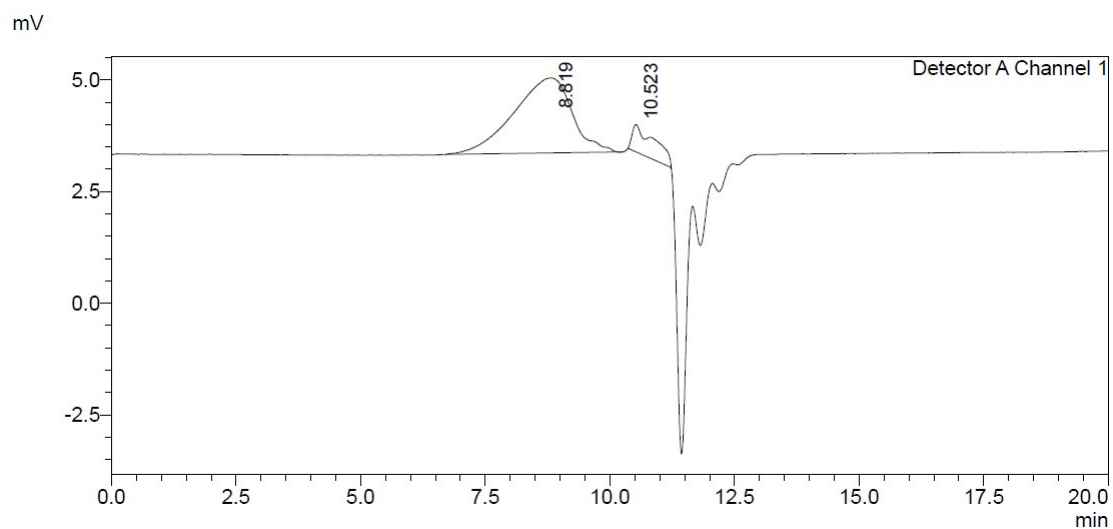

GPC Chromatogram of p(TPD2T-EDOT)

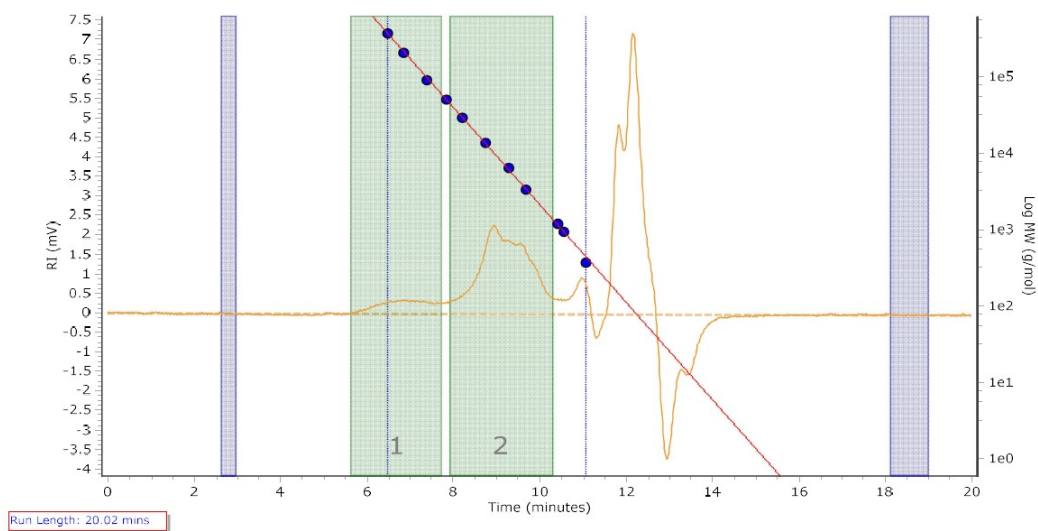

GPC Chromatogram of p(TPD2T-DTP)

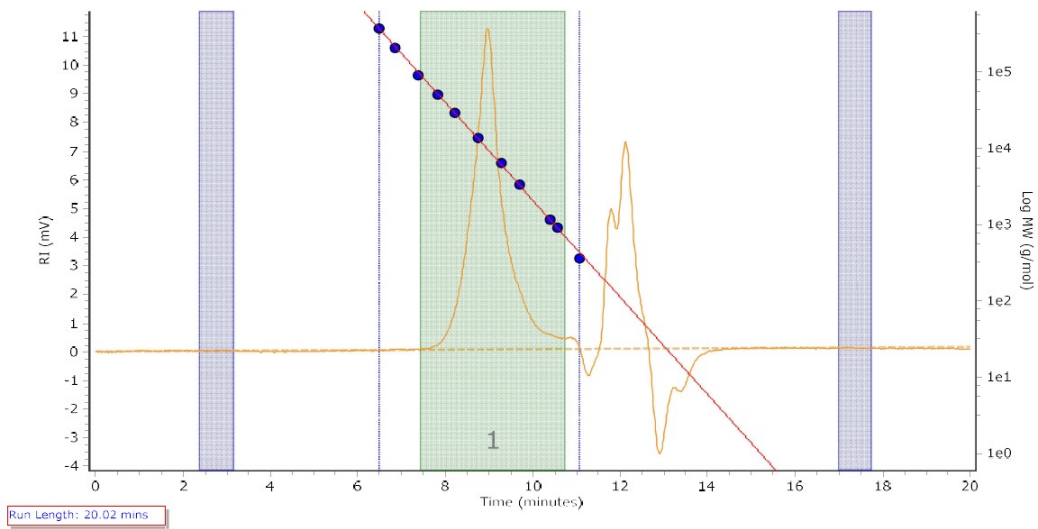

GPC Chromatogram of p(TPD2T-CPDT)

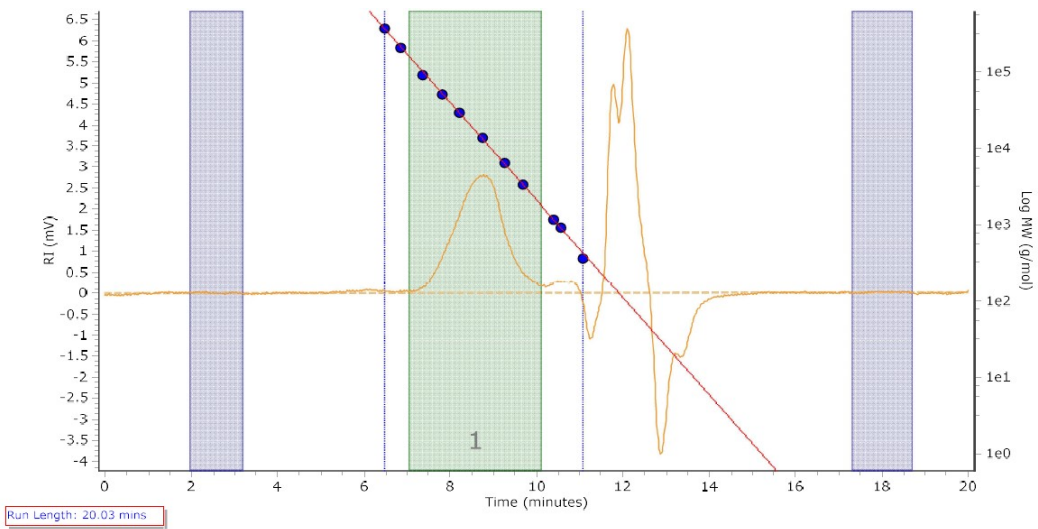

TGA Analysis of p(TPD2T-T)

PTPD2T-T  
 30-800C\_10C per min\_N2  
 Kok Chan  
 D:\TA Data\SDT 650\User Data\Kok Chan\AR25SDT20062\PTPD2T-T.tri

SDT650,6/6/2025 1:57:42 PM  
 5.909 mg  
 Alumina 90 ul

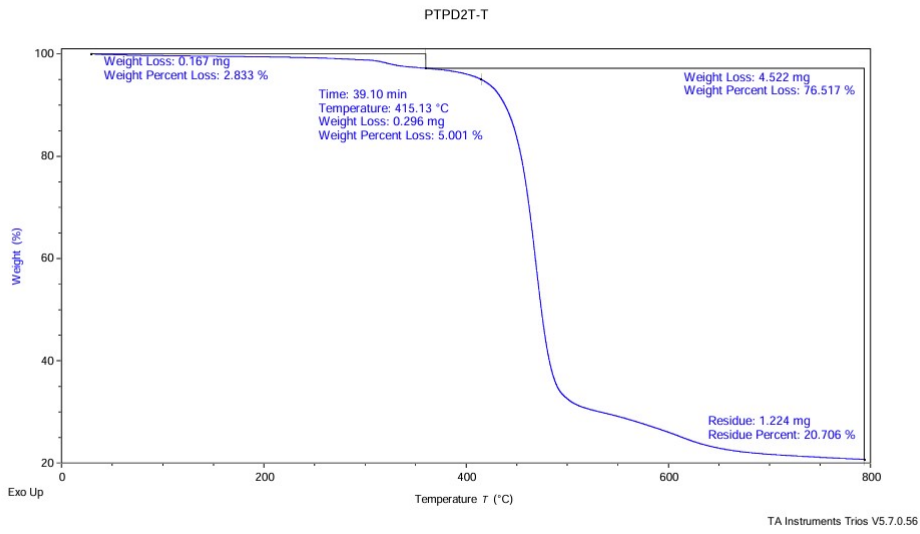

### DSC Analysis of p(TPA2T-T)

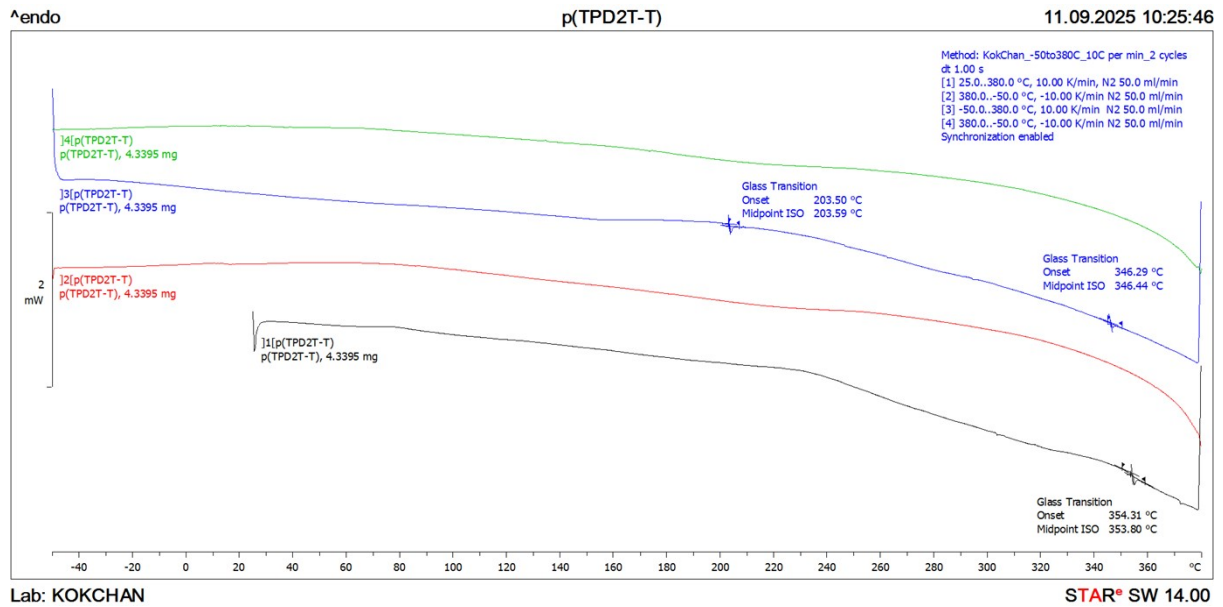

### TGA Analysis of p(TPD2T-2T)

PTPD2T-2T  
30-800C\_10C per min\_N2  
Kok Chan  
D:\TA Data\SDT 650\User Data\Kok Chan\AR25SDT20062\PTPD2T-2T.txi

SDT650.6/6/2025 7:28:09 PM  
6.460 mg  
Alumina 90 ul

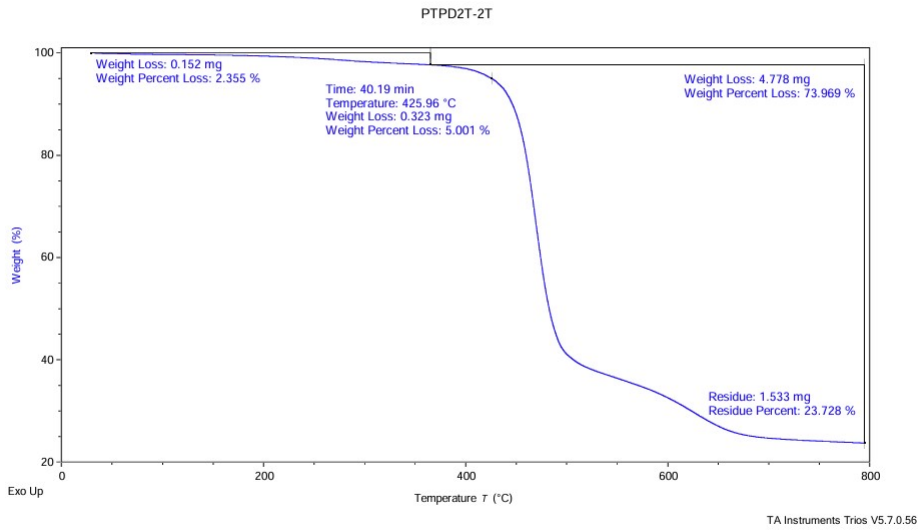

### DSC Analysis of p(TPD2T-2T)

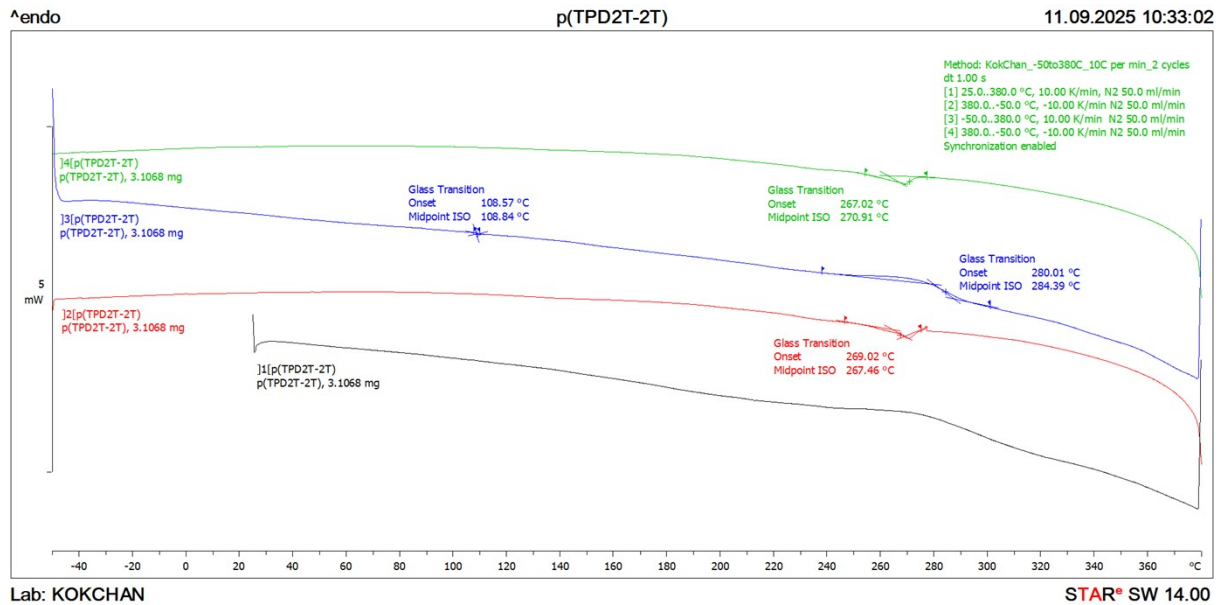

### TGA Analysis of p(TPD2T-3T)

PTPD2T-3T  
30-800C\_10C per min\_N2  
Kok Chan  
D:\TA Data\SDT 650\User Data\Kok Chan\AR25SDT20062\PTPD2T-3T.txi

SDT650.6/6/2025 4:45:22 PM  
4.263 mg  
Alumina 90 ul

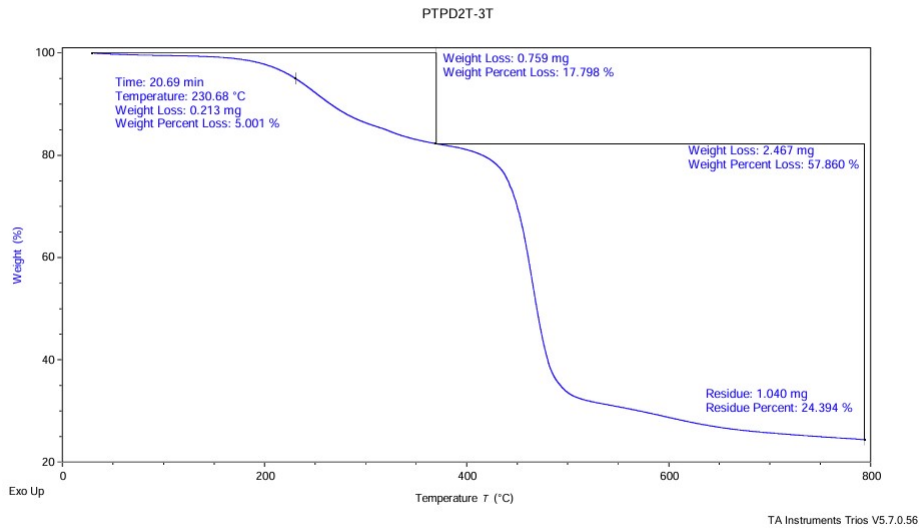

### DSC Analysis of p(TPD2T-3T)

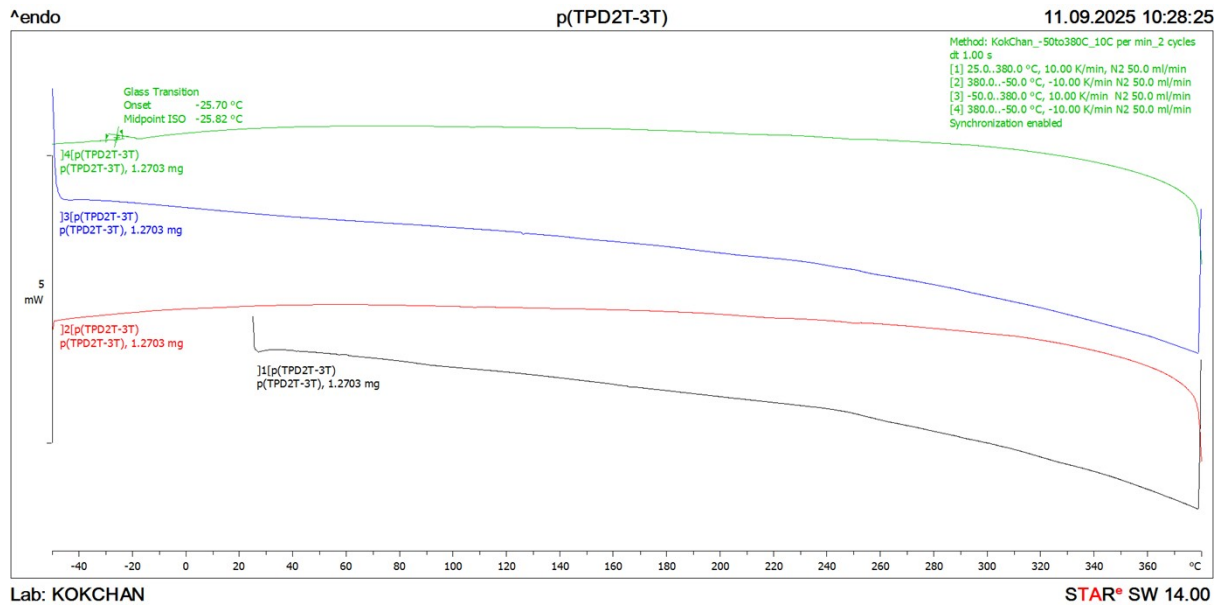

### TGA Analysis of p(TPD2T-TT)

PTPD2T-TT  
 30-800C\_10C per min\_N2  
 Kok Chan  
 D:\TA Data\SDT 650\User Data\Kok Chan\AR25SDT20062\PTPD2T-TT.tri

SDT650,6/6/2025 11:02:47 AM  
 8.447 mg  
 Alumina 90 ul

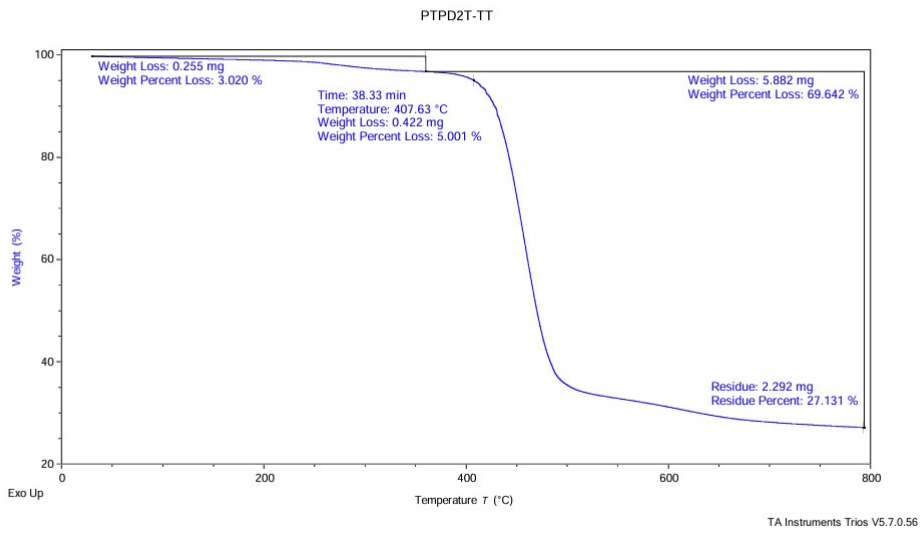

### DSC Analysis of p(TPD2T-TT)

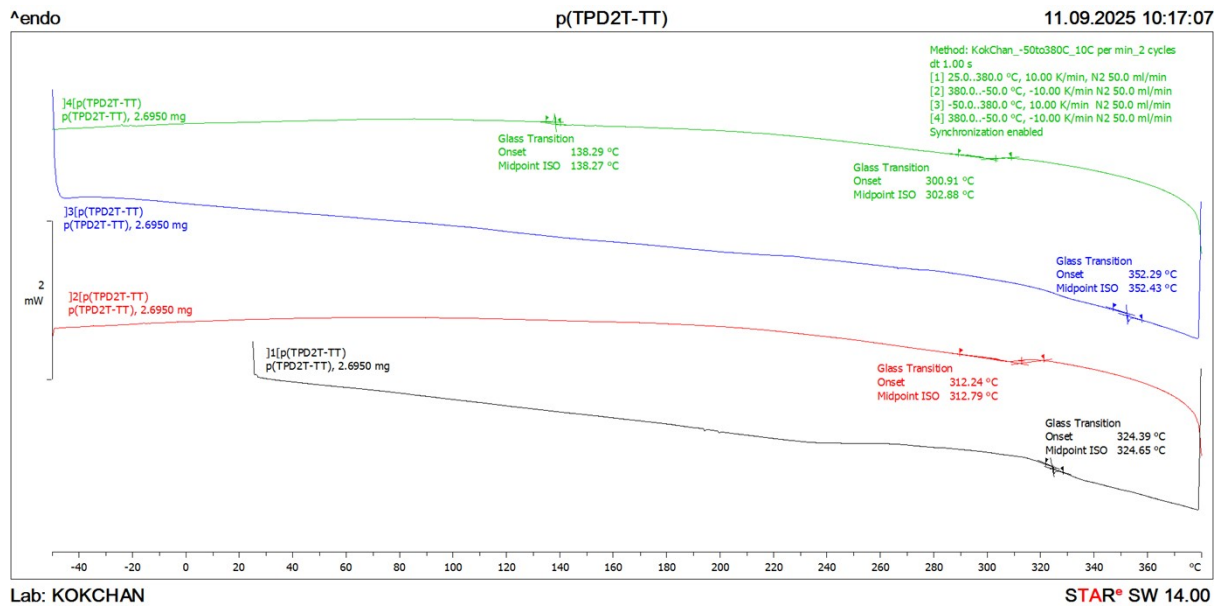

### TGA Analysis of p(TPD2T-EDOT)

PTPD2T-EDOT  
30-800C\_10C per min\_N2  
Kok Chan  
D:\TA Data\SDT 650\User Data\Kok Chan\AR25SDT20053\PTPD2T-EDOT.txi

SDT650.5/5/2025 10:14:10 AM  
11.38 mg  
Alumina 90 ul

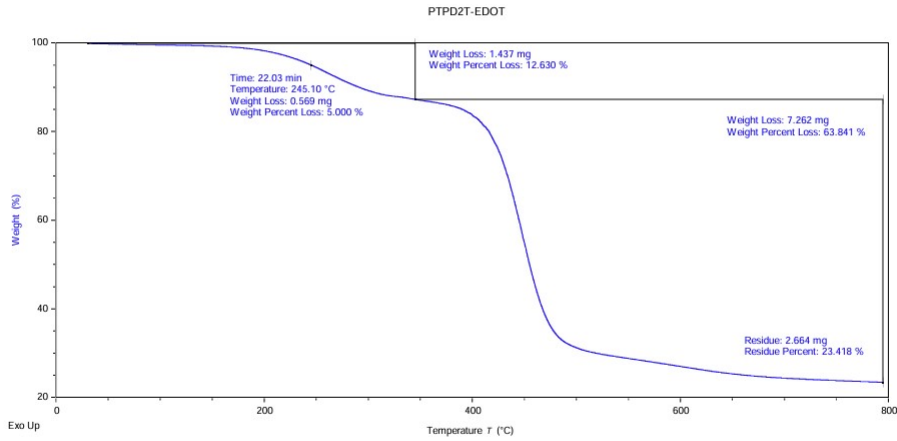

TA Instruments Trios V5.7.0.56

## DSC Analysis of p(TPD2T-EDOT)

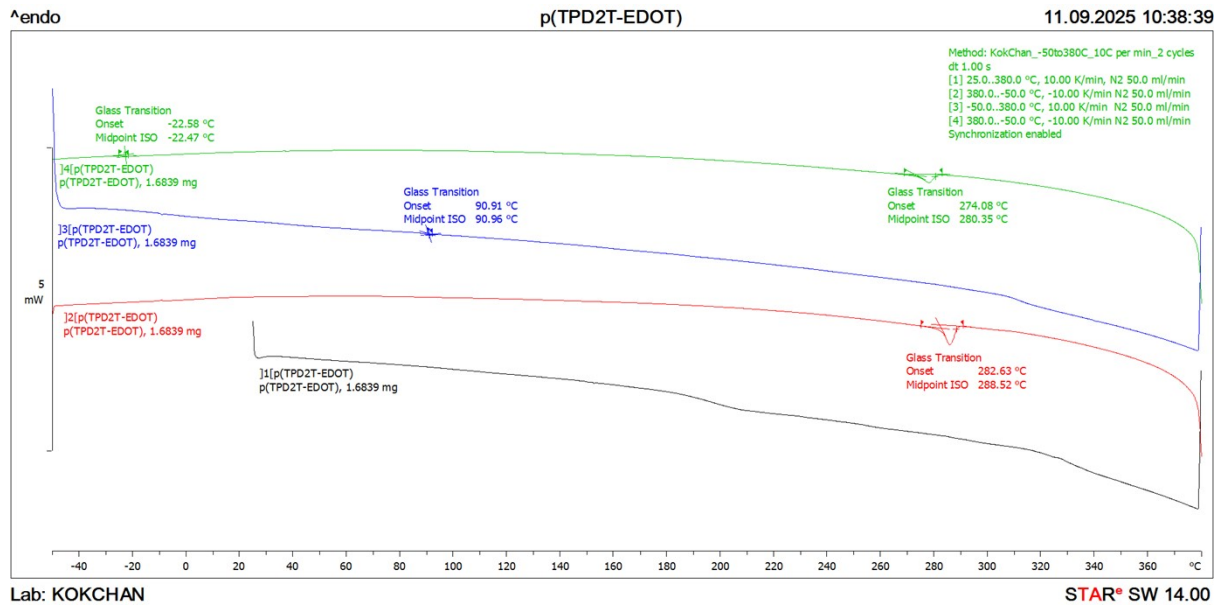

## TGA Analysis of p(TPD2T-DTP)

PTPD2T-DTP  
 30-800C\_10C per min\_N2  
 Kok Chan  
 D:\TA Data\SDT 650\User Data\Kok Chan\AR25SDT20062\PTPD2T-DTP.tri

SDT650.7/6/2025 12:53:39 AM  
 5.996 mg  
 Alumina 90 ul

PTPD2T-DTP

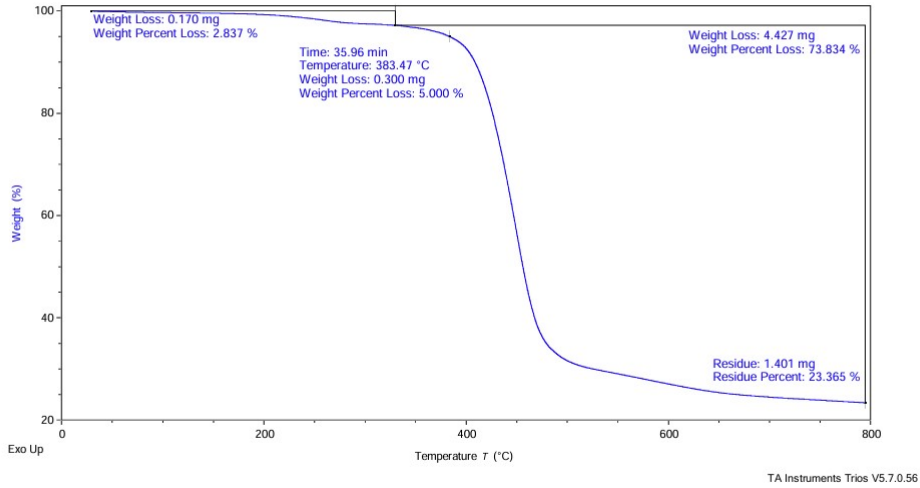

### DSC Analysis of p(TPD2T-DTP)

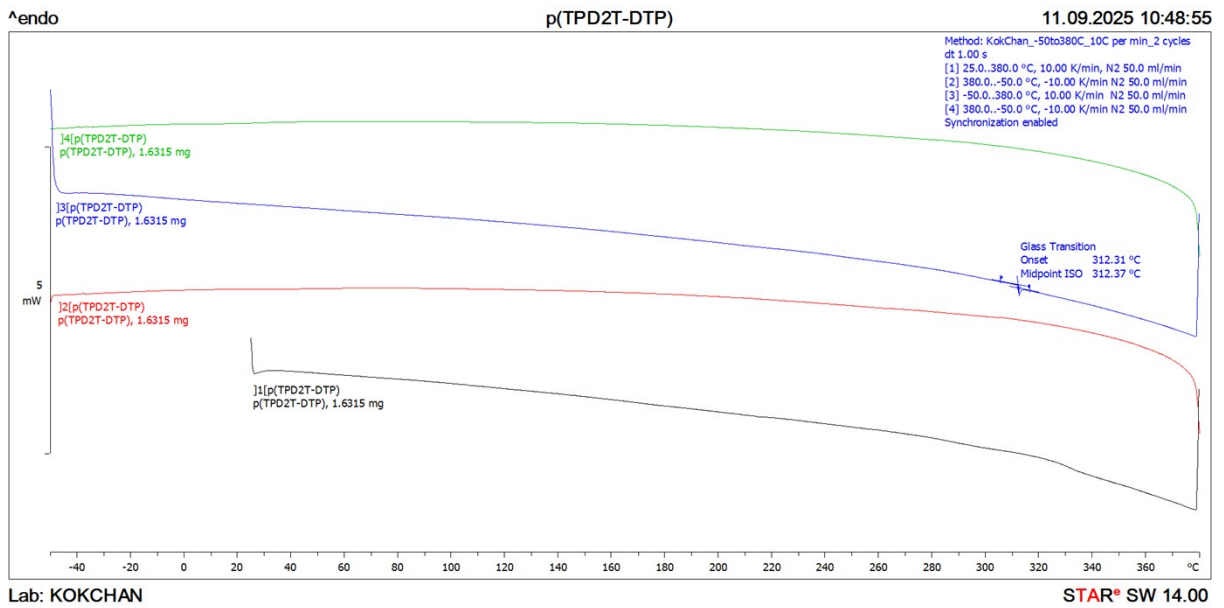

### TGA Analysis of p(TPD2T-CPDT)

PTPD2T-CPDT  
 30-800C\_10C per min\_N2  
 Kok Chan  
 D:\TA Data\SDT 650\User Data\Kok Chan\AR25SDT20062\PTPD2T-CPDT.tri

SDT650.6/6/2025 10:11:04 PM  
 5.791 mg  
 Alumina 90 ul

PTPD2T-CPDT

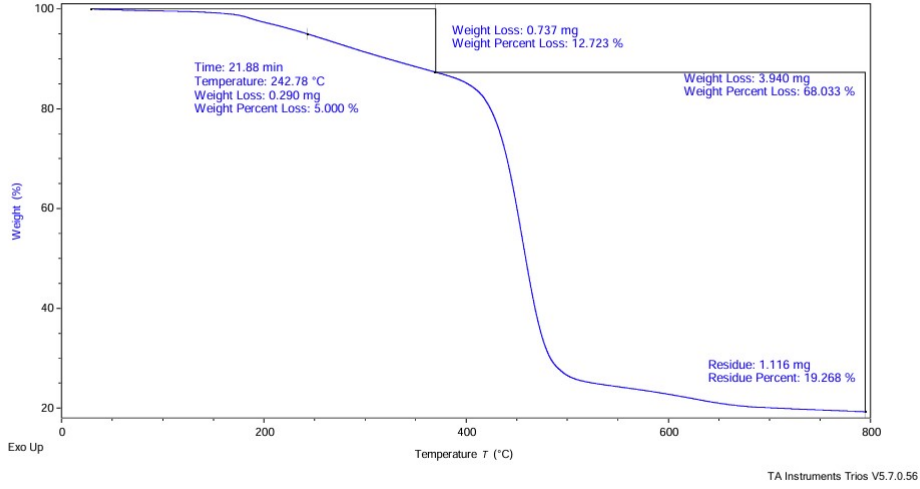

### DSC Analysis of p(TPD2T-CPDT)

^endo

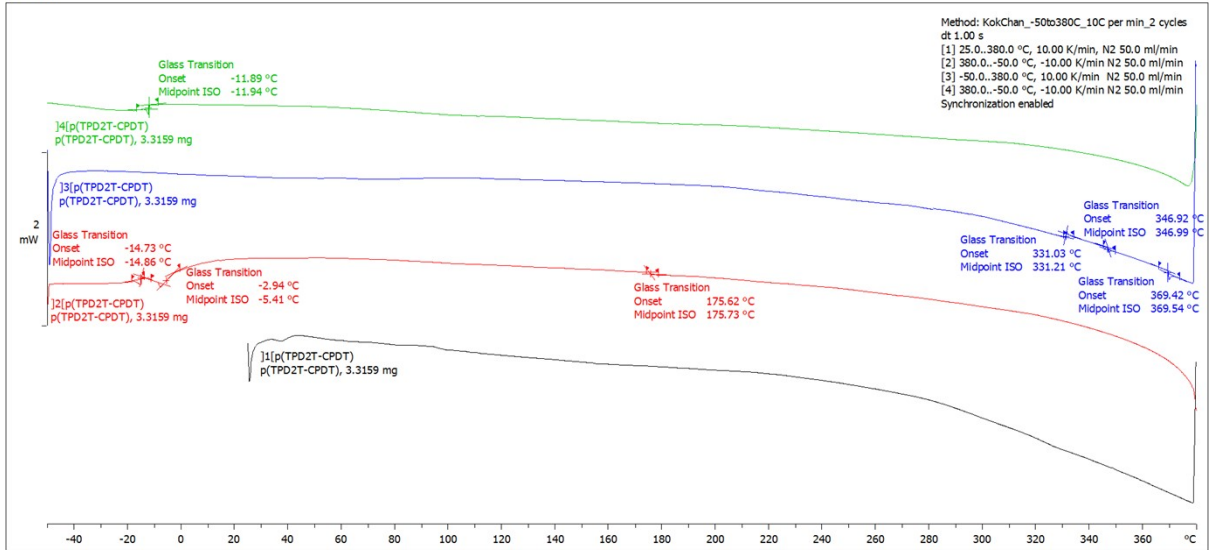

Lab: KOKCHAN

STAR<sup>®</sup> SW 14.00

## GOAT(GFN2-xTB; ALPB(chloroform)) global minima

### TPD2T-T

130

O -3.64141735902328722574 0.43149486981083728931 -1.43163578802557056591  
C -2.48767225567336280889 0.12905349827205755964 -1.18015137788267532315  
C -1.72674142453012913201 0.27049546932847856606 0.05198194845861012908  
C -1.92761525481087758749 0.75612255224950242205 1.32158609004126614828  
C -3.05912441751368691101 1.38939643421682390567 1.89064367185238069169  
C -3.18831048346793588522 1.86766320558947440666 3.17601509828459871443  
C -4.41096623656437714089 2.52162230801456921370 3.40889863192026254524  
C -4.79135905513229420905 3.17945911235243938719 4.69823050716546752881  
C -3.78390503265063360416 4.23176929693625591966 5.18258194110261261045  
C -3.74953350468774493365 5.52337374292841420953 4.36020229339380982481  
C -3.19129528886104152363 5.40037720857693237519 2.93962594228123430540  
C -1.72408195169530298330 4.97840734490080816244 2.88994163651565738604  
C -1.26878968644672474042 4.64836879395777202717 1.47009287211155381669  
C 0.17166591264724717636 4.14018078484445783971 1.44005908834434204202  
C 0.56228749292776158963 3.57693220534481293171 0.07554081430106733552  
C 2.00069023884018681869 3.06311652818614676974 0.05843872462705705650  
C 2.35709590008456215671 2.38226348905731644123 -1.26073513513909452044  
C 3.82080053849911349673 1.94991550182379969058 -1.31270107000866653735  
C 4.13682241092767455370 1.18534917209605850097 -2.59226415054243641833  
C -5.20673869893900675976 2.49409206197584021325 2.29481556290773935913  
S -4.49084290155779441989 1.71136863544155004568 0.94719937534733678053  
S -0.45748700166076422535 0.53102803084730709759 2.25629297350800861466  
C 0.40831739073347000923 -0.20366764893987981955 0.91681959479904551191  
C 1.75904167478532214020 -0.59586728563363311473 1.04198823916735539008  
C 2.58240668697613751092 -0.44073779673881580132 2.13613295242564094067  
C 3.89511303579852219414 -0.88857497071130830957 1.94379003580794695871  
C 4.89999321168111823255 -0.79456230118980608612 3.05007409794064043851  
C 4.51501989774560108515 -1.62557918591063743641 4.28517151606743684766  
C 4.93484633296706931560 -3.09489279285561735833 4.20982609722767264770  
C 4.33088075234741598507 -3.89920187334874990270 3.05813616505734264805  
C 2.80789059463286516660 -4.00133718549413508470 3.09913176479367935556  
C 2.27805462091694943538 -4.81191400458471552071 1.91732773988553995004  
C 0.77063375057577565563 -5.06259439907122477109 1.97406654236488909859  
C -0.06950262209482034603 -3.80407686639176079169 1.76372440189536128230  
C -1.56381474701764600077 -4.12202464697987558395 1.76510166021072212317  
C -2.42359239260930658943 -2.87396958749515940568 1.58221935782138567461  
C -3.91755919699213350782 -3.18945433515674148239 1.59048648377305790191  
C -4.76630593809395364246 -1.93037472410293520220 1.45925478139632258667  
C 4.08562720366670095729 -1.38680876400672126181 0.66231807473052284330  
C 5.24262488708880436405 -1.91192322408729187266 0.00539965358050866970  
C 5.26171020401253031196 -2.47167786434308167642 -1.25144177515236543208  
C 6.53770872530179047999 -2.88710510450298807328 -1.66604249854774266737  
C 7.49626519252540557403 -2.64474534973707253727 -0.73282275913545347201  
S 6.85317049683026624507 -1.90453696380243475694 0.67491938343480073481  
S 2.61661605312566880599 -1.32746278943524975702 -0.28111012136508484183  
C -0.42946174329803610270 -0.26656597583006252927 -0.17234067075488279652  
N -1.62069987775957802256 -0.47359547074815289136 -2.08389303150062277226  
C -1.98812981124371690456 -0.78782486072881507955 -3.44699542792106417011  
C -2.00559509290752657762 0.46086065604035192367 -4.34343322182906366180

C -0.58032552204951581842 0.99130531736498372908 -4.53842421404617368808  
C -0.52067722638019942050 2.30222273835223978367 -5.31390895497328052954  
C -2.74828431792815930379 0.16467462503218127656 -5.65390618178275605743  
C -2.08082262697548525665 -0.86336764788266939785 -6.56595322610272980057  
C -2.91476615399435123877 -1.11769569489875664203 -7.82119724601704824352  
C -2.25431269681253976245 -2.13457093314867618616 -8.74550438789715123278  
C -0.36990617214804183410 -0.74663199292805215723 -1.54114425374134689228  
O 0.53758454590470683421 -1.29592788469987141298 -2.14377974396742176921  
H -2.41505705056957209464 1.74193067373204257819 3.91259754199429687915  
H -5.77403345701679526769 3.64078830565104238914 4.58704369520055887932  
H -4.86884951909605590004 2.40649232470912055604 5.46859925465167062697  
H -4.06039642921112609031 4.50222523957172615638 6.20486540223277049932  
H -2.78830759892463575511 3.79158660959593385442 5.22404865984924615674  
H -3.14526307495987111906 6.25315599066082761226 4.90612870237069298440  
H -4.76509986516473915685 5.92268858066511239002 4.29665047969628766111  
H -3.29637404596532412882 6.37045026893431831638 2.44630131561594987843  
H -3.78850765817055856743 4.68598471378021841360 2.37384849333602465649  
H -1.09854028021523197900 5.77377361285200141339 3.30168187377082800182  
H -1.57751145055415720186 4.08933266050700616745 3.50312144144181258909  
H -1.92692696014445785657 3.87848887336907832690 1.05779700988647684667  
H -1.36170439766167783446 5.53113496107297031301 0.83329716132575393228  
H 0.28784387494457036594 3.35480915046000038870 2.19090589233129984237  
H 0.85123441017536194408 4.95328331524584353218 1.70461998609880760469  
H -0.11646004987251200313 2.75916302425146398036 -0.18390941679389719021  
H 0.44323294211419911326 4.34959137262974770977 -0.68787323265011979245  
H 2.68277284270822091727 3.89943067297665457716 0.22797378822532904374  
H 2.14079066958877461957 2.35240309526059121481 0.87680898025264997209  
H 1.72106524152652440307 1.50282299543800124120 -1.39958412323577863212  
H 2.15415845054461874142 3.06633363660785240867 -2.08833591276771279865  
H 4.46098071780044858059 2.83270998279350516569 -1.24546834597048872162  
H 4.03956520848345235208 1.31728268249236069032 -0.44933340260071691352  
H 5.17851546709856780382 0.87230138607188534294 -2.60598850520657743246  
H 3.95170632471583038736 1.80806492611757341216 -3.46525193872355963265  
H 3.50899178687283130884 0.29939024763893445913 -2.66687663224365856252  
H -6.18880749853608858047 2.91300703464556454136 2.19033251451934019016  
H 2.23453073769263887982 0.00616614054624183960 3.05139899080529319875  
H 4.96013133835316111231 0.25605297143572514074 3.34717806959983255055  
H 5.88695222076405322298 -1.09929289158806575699 2.71030702852056171182  
H 3.44085008020808391649 -1.55687799485603739491 4.45635981966004557364  
H 5.01242385230608533675 -1.18948540743461039781 5.15457327920895558293  
H 4.66119399070607176583 -3.57400212782544413059 5.15390753551886149353  
H 6.02331908512816571744 -3.14091742300312803948 4.12209936869199822240  
H 4.63314028183714388121 -3.46092421312191245164 2.10783534855762200166  
H 4.7495985556098631268 -4.90894537420344434508 3.09423914853469916864  
H 2.50003381158407744778 -4.47750975085886970817 4.03344671971833790280  
H 2.37314958452422386515 -3.00271680445070598964 3.06953401492184196897  
H 2.78923630426917412706 -5.77822637373619052426 1.89679703008492106520  
H 2.52084216441537245501 -4.29295697515654595122 0.98640269213913234214  
H 0.51565371178177477063 -5.50757634724872069398 2.93909629081118595195  
H 0.50827952330780379331 -5.78684194107039839849 1.19832344359625486696  
H 0.20299511351679591642 -3.34269382249973867616 0.81014836699823711275  
H 0.14062640218568320249 -3.08157110454798743859 2.55461362994465757126  
H -1.78298751533122490365 -4.82991416839688092466 0.96177241104275879024  
H -1.82730103180931102713 -4.60311947895176221124 2.71019253353226030612  
H -2.20327173587982239056 -2.16317485030949274716 2.38302436477020007644

H -2.16510842562809147083 -2.39481313758260805358 0.63382648942088526400  
H -4.14571531438607454589 -3.86963508298404601504 0.76642505877774114165  
H -4.17143517278391673386 -3.70040916906179528922 2.52227395787562569396  
H -4.57925681681134300050 -1.25707020951902936901 2.29351743536449559357  
H -5.82480034796449874790 -2.18002533588720037727 1.45099693014002562030  
H -4.53502804121653202429 -1.40095882128538518074 0.53626835747453827086  
H 4.37529468128897658374 -2.57635250544162186515 -1.85203864634104986564  
H 6.73389157348997979824 -3.34604930173538539506 -2.61850743750936310050  
H 8.54590567355993613319 -2.85642557876984737320 -0.77923308978250593881  
H -1.25578319120909309703 -1.51391285164586175682 -3.80559439586154812929  
H -2.98385591823266871359 -1.23985012587571552523 -3.42564858792662763065  
H -2.58665906536782008729 1.22693009369040462175 -3.81419783875636309034  
H -0.13536730539055508160 1.15047181527725439487 -3.55220991577972178277  
H 0.02605025780201400062 0.23575145837609329247 -5.04090258536169422143  
H -0.84603579528987160607 2.16478356317159548183 -6.34130468127482060936  
H -1.15671055701176550556 3.05098697696016918357 -4.84547148629918833507  
H 0.49967768534668399738 2.67917535007292162419 -5.32957258982960535576  
H -2.86955061407155476161 1.09966830711619945049 -6.20339446179734821385  
H -3.75141120689309248704 -0.18756144925832601844 -5.39898368108637338736  
H -1.09389943670428491096 -0.50835484040348954959 -6.86602163387658936955  
H -1.94991604982868405038 -1.80575686951081459952 -6.03148327431247377461  
H -3.90344941173980819471 -1.48090711019541765303 -7.53025909762792000635  
H -3.05446791452819121915 -0.17661926872031136204 -8.35868707264161159287  
H -1.27662579265915154814 -1.78045804547019814734 -9.06631106106742912232  
H -2.86562670557053600362 -2.30265271218562395106 -9.62947041648842017025  
H -2.12176592385764406501 -3.08569400774309654523 -8.23360452290835453937

TPD2T-2T

137

O 3.29380926832932807713 1.05134828698309967798 -1.33542512700596915920  
C 2.19233579430518332742 0.55098197011745464469 -1.49440169412269874272  
C 1.00827124376878440870 0.60556715239736247369 -0.65441774254179241321  
C 0.62022646431966188540 1.21452211572715951249 0.51753906990663578469  
C 1.34850040993843967030 2.04443087819635493929 1.39822389665355029109  
C 0.86997009130866320703 2.69019939857930445726 2.51743358584889520557  
C 1.81780819853088715377 3.47758939465595506846 3.18209744224441593019  
C 1.44251854008662760975 4.31790073145061370496 4.36383435271296971081  
C 0.25684017103219769496 5.23343324633454365369 4.03465273493557319284  
C 0.59068642896993461822 6.20287969313938880589 2.90131571727350934253  
C -0.63407492917927632536 6.93056617608868208436 2.34286997955826770124  
C -1.65274698683670195898 6.02997395516369660839 1.63773262714043288391  
C -1.09025692265691565019 5.29169696701340264156 0.42366986794447791809  
C -2.16370057478901589576 4.46522077597763900059 -0.28192624659670828535  
C -1.62465655299999367500 3.74515349718238699239 -1.51650775927121039821  
C -2.69646823284161341050 2.89040577812514554168 -2.18989563453001467863  
C -2.16420590771889642667 2.13451768179779222123 -3.40495753742660012264  
C -3.24553580532103813638 1.29341078295511313634 -4.08026207511700800268  
C -2.67660216797683370160 0.43346108956001877521 -5.20247868659294887550  
C 3.06160296282043997707 3.41217589318271175003 2.57016222950845385498  
C 4.31563840731676506834 4.01042662783235748236 2.90611593153104630360  
C 5.43235067437710927862 4.03859937351005537920 2.10295440648816400753  
C 6.54280276783582159794 4.65548697533741684396 2.70231949948511429582

C 6.28257987287291363998 5.09017089555808599499 3.96421394980418195786  
S 4.66803996647570684786 4.75890274950090663708 4.44061438402278074733  
S 3.03454046100749019743 2.39377746298463200958 1.14919124467714750537  
S -1.06736704703234974723 0.83730568939873795120 0.82564675456155356414  
C -1.22068466171168710233 -0.14088991071460343907 -0.62341143075809746232  
C -2.43311040051493643332 -0.79380694053646760899 -0.93802229829440386677  
C -3.62577392470790815793 -0.72151929331713293703 -0.25191882190270192821  
C -4.63666242304555886733 -1.54622584124404793826 -0.76055887208703409907  
C -5.98661495639301843852 -1.64169059577072107281 -0.12099442855177242051  
C -5.96127428745561172008 -1.83633886329910533952 1.40092731310318430182  
C -5.46614499621389526851 -3.21270531602326370191 1.85528322936674250343  
C -3.95631780853229209072 -3.44233479441270873167 1.74628697115612974144  
C -3.14309265852893160442 -2.58135056204037871552 2.71166090086719391294  
C -1.64057114461513853243 -2.68539436395047292905 2.45878966223782224887  
C -0.84788930661310657477 -1.75883245646393104877 3.37930112091914525152  
C 0.64178068674489052725 -1.73443541042031590393 3.04537835201675388674  
C 1.41361405136775086788 -0.76346908369414567819 3.93650662307349463731  
C 2.88717618998116121176 -0.67112212126447945426 3.54801277600232189968  
C 3.66364040120718881255 0.28965815192619709384 4.44588929130201560014  
C 5.11453941230777342497 0.43116487928275681885 4.00193421049461139916  
C -4.21781613875683625281 -2.23665075481338870844 -1.89099651815482894257  
C -4.89965442394099959245 -3.14496326810493798121 -2.75925628476338458128  
C -4.31776900268476815370 -3.86733686522339281666 -3.77612430755082506550  
C -5.22530011159508145369 -4.65931301175722634156 -4.49842129218315367467  
C -6.50138006505099586008 -4.54058226769797990130 -4.04431464576467902816  
S -6.61531653121708629328 -3.45756186097363826804 -2.71826185920949825459  
S -2.55277212489775884308 -1.88267967259925228518 -2.28890794399835151296  
C -0.01647551240111617965 -0.14613077233821875067 -1.28977449304213109826  
N 1.82689633993773825615 -0.20778355081096455681 -2.60089915722758080463  
C 2.70109500954057457633 -0.45253106041225737988 -3.72650101500150965350  
C 3.17950452712998110627 -1.90898029523239487482 -3.81272638024711341131  
C 4.08746611076451671352 -2.05642506283606918416 -5.04047873755550046582  
C 4.30065991611602616018 -3.51207086233602749914 -5.44068572427056462715  
C 3.88608341262740308863 -2.33663267510711403219 -2.51398997377498290007  
C 3.01309411110644376208 -3.22064776540340158562 -1.62411711668486558047  
C 3.73072668683844499427 -3.62349737364051627253 -0.33765261770820909071  
C 2.87408106972232380016 -4.53912471254433835810 0.52886697238330215853  
C 0.51540057668882621744 -0.66300916397008380354 -2.54003115016495550904  
O -0.02280269059055471670 -1.33167012359153269507 -3.40688193743775258326  
H -0.15314778127241493455 2.58948936969340604008 2.83285695612685994860  
H 1.17191866850192649707 3.66284423250377999537 5.19602538307845129850  
H 2.28612342003483348662 4.92840820716394123480 4.67911519584547086481  
H -0.01563700838650803476 5.79716523395302640864 4.92890887016233936180  
H -0.59945553494177916676 4.62257454752576979473 3.75407783492096402966  
H 1.30143081383300751597 6.94743609747193779924 3.26889384911080727036  
H 1.08423008690661681896 5.66113675810186567361 2.09314638426868127041  
H -1.13962250456246749764 7.45209503971967901492 3.15974619822800839586  
H -0.29047134469407026591 7.68722889531751363279 1.63279291893123379431  
H -2.05906578067087986383 5.30247975858368292279 2.34223381196740421117  
H -2.48597994991479387394 6.65676951294781016344 1.30912752947926347424  
H -0.67015956127191778080 6.01662437710795394707 -0.27814111820127773722  
H -0.28467306409065340489 4.62368583441177971594 0.73322604925396650533  
H -2.98709754977084385175 5.11796255266768351788 -0.58148031223798046785  
H -2.56399858611957487398 3.72582026859459514156 0.41569869507897772021  
H -1.24645355796923218428 4.48088245554080266686 -2.23063053839143776713

H -0.78119026729507179407 3.11101262997594441018 -1.22974490561804628008  
H -3.09038730779167991614 2.17133643587112512563 -1.46742667886642119690  
H -3.52405406157804357292 3.53184810176582386632 -2.50159362509038718514  
H -1.34648328982712972568 1.47751367044245363047 -3.09569222987342085318  
H -1.75400447066364084669 2.84514131569994432880 -4.12696650158501476824  
H -4.02064285824395550861 1.95222235655647158303 -4.47887654829307546578  
H -3.71349497630010683125 0.64719545396130540027 -3.33400935104977946821  
H -1.91392266807348065960 -0.24049596811880041836 -4.81533621078266449445  
H -3.46041842753426687196 -0.16490145997171007375 -5.66194742782870985565  
H -2.22338698048041516486 1.05705824017761806921 -5.97073707621975380277  
H 5.44133144565421922323 3.62786315563402261830 1.10839653728061171556  
H 7.49514584118722559936 4.76938307597499910884 2.21617181097065918394  
H 6.93714483115136282265 5.59317994936929085981 4.64774715824186657187  
H -3.74554639957728063848 -0.08220744351423150964 0.60384720300233374335  
H -6.53126851157646282076 -0.71822256408295259700 -0.34077959369967669723  
H -6.54770873036336542583 -2.46431993341258692709 -0.56056234802408100304  
H -5.37007318941837841209 -1.05298725457381237014 1.87206817830020844085  
H -6.98909680124122267841 -1.72122988773191964995 1.75334815914894193156  
H -5.97857884791249105660 -3.97788467988143112919 1.26701270868352899868  
H -5.75799019605190309790 -3.35329774013388126619 2.89944982495634073771  
H -3.75180492883036365015 -4.49538050346739748164 1.95752061372498653569  
H -3.62836382591151629384 -3.25056538544242012989 0.72475302023488630265  
H -3.36172324214336226689 -2.88263434211466185175 3.73883891144401925288  
H -3.43203461994411895830 -1.53543036706168067873 2.60675394862119436112  
H -1.43618600838536036868 -2.41845607288385533451 1.41815795421858115155  
H -1.31125372636853976260 -3.71731471202962460154 2.60182736211864185094  
H -0.98067329582052253922 -2.07691247981613180684 4.41573193667711816346  
H -1.24562230072743629350 -0.74529366581992206875 3.28962339903843270505  
H 1.05810535335079047847 -2.73836629681105181433 3.15628407153795542683  
H 0.77306386719755904036 -1.44045718768385588859 2.00016936042666015894  
H 1.33321168908506315631 -1.08648033738188454222 4.97704050220652050029  
H 0.96319830525051508552 0.22900595005850757357 3.86085778969959703133  
H 2.96595314116216934863 -0.33310661309846051337 2.51115542519475543060  
H 3.34095350546578639950 -1.66358258844553663636 3.60456555925104682458  
H 3.63139515268627333100 -0.07263955663657986617 5.47606795662702250382  
H 3.18281992174199324097 1.26998724478823477035 4.42373469544212305493  
H 5.61777471486498125586 -0.53341707930477388899 4.02434813797369539401  
H 5.16440901704851640375 0.81788511362480609268 2.98571934598044164133  
H 5.65185814783198381406 1.11419387308762884992 4.65609439050572149199  
H -3.26398199214002238122 -3.82270936323536902890 -3.98868028572695276779  
H -4.94117209945439217478 -5.28990948652915804473 -5.32177586615652042923  
H -7.38794902848538903584 -5.02577087243975206832 -4.40098459980634437727  
H 2.15115121948422594045 -0.19278461255455181522 -4.63673351256710120083  
H 3.55409827817676360340 0.22125934830860435887 -3.61045351954033533204  
H 2.29460170441072808245 -2.53688277783121796105 -3.96272666067511591947  
H 3.63301105624013098705 -1.52789764949361428492 -5.88168912984368041919  
H 5.04959285460303419768 -1.58302940277827119964 -4.83227002631392199561  
H 4.94598746641266551194 -3.57095990364954785079 -6.31427828041222216626  
H 4.76322375191626345980 -4.07866316807842732572 -4.63647033165894484341  
H 3.34862265815153392623 -3.97924733064229974033 -5.68392152744638146089  
H 4.79676023962730990746 -2.88672425826993084286 -2.75523537956693509443  
H 4.19079451628148280662 -1.44918199336502007135 -1.95344461761450682857  
H 2.08781785144316067715 -2.69501699108926340287 -1.37132281090970864490  
H 2.73357372580533652950 -4.12069363380354669602 -2.17770809201888226880  
H 4.66296202779667545713 -4.13339316236757969847 -0.59253473799218303597

H 3.99054686445835882225 -2.72332203249911808385 0.22474957157505717764  
H 3.39965836742301208417 -4.80094637895247355885 1.44447277550768582444  
H 2.63635398969889855891 -5.45635709129995127853 -0.00624041615249872755  
H 1.94045485236239279025 -4.04780542571915091798 0.79466468744053420092

TPD2T-3T

144

O 3.72301593954862797275 -0.05643614163645659099 -1.17259697540098750679  
C 2.65593843077831159860 -0.56321530011738174526 -0.86636696037661076186  
C 1.52392072850361204317 0.00332894981223076517 -0.15577756983072910124  
C 1.17254277225480207925 1.21714595040320761044 0.38809729746090187996  
C 1.86416984750091496714 2.44844674638900627883 0.39637019254016786496  
C 1.41845297342437692834 3.64693090716520540440 0.91085723065384816000  
C 2.29798109735916256113 4.71903086568684582147 0.72962036146320985441  
C 1.93362854217325796924 6.10686622005896229126 1.15008069671367074704  
C 1.34915159428795350394 6.91759311602557502852 -0.01849652587070239190  
C 0.11093825299605170054 6.28281017230397687001 -0.65424948559337869902  
C -1.12346017005755971496 6.31590761754925633653 0.24589575016676448738  
C -2.34342802565299912487 5.64385721123643691044 -0.38894060322417983722  
C -2.22034471011441780774 4.12244221460673188062 -0.46924578771100100560  
C -3.48549131700827619085 3.46963989628485736105 -1.02309810599631334505  
C -3.35522249733426924934 1.94942424832221039566 -1.09765794713114295256  
C -4.63394862516452565870 1.27727590684110214880 -1.59297399484684243376  
C -4.50510613761500167129 -0.24434625516941302359 -1.62121885478766514233  
C -5.79122833157124272674 -0.93082689577180544038 -2.07560979562174097168  
C -5.66352506814399347945 -2.44944494240917309824 -2.04171398470486842314  
C 3.45779921118792765711 4.33047429519195858916 0.07318788784664483071  
C 4.61855602135953358101 5.07431044706644751585 -0.29726859597653310097  
C 5.73221862196540321577 4.57235644536182483932 -0.93217339837784252143  
C 6.72990510412068410062 5.53309793795696336360 -1.16192046359980283299  
C 6.38262935282708721019 6.76769508073824610506 -0.70791465989360524702  
S 4.82576934744748786699 6.77777752482141515600 0.01171437685411470288  
S 3.43917794719987357510 2.62757314812018494266 -0.32369926628434547711  
S -0.41698074880493085637 1.07386704571593893931 1.11924650197347141933  
C -0.58552400080199185073 -0.61686473639076422337 0.67183228196174138436  
C -1.75512197880551124030 -1.33318088325740635725 1.00388593751068766480  
C -2.84587428306405731959 -0.85713095211049605826 1.70108726500913998159  
C -3.87494515056904242911 -1.78602139677671667428 1.87531397211639294653  
C -5.10655446303604598768 -1.44963324886755451359 2.65340549824987270711  
C -5.02043075578559250260 -1.94331170401798236647 4.10692463977990929180  
C -3.78296490485872460852 -1.44590909279044854685 4.85590355489024627644  
C -3.79551081369488230166 0.05649389833518241727 5.13667692214902782410  
C -2.49924225912879283129 0.54713120086072819515 5.78667208341295591367  
C -1.31867118210455003258 0.58530343966509479348 4.81603703250327086494  
C -0.03655324200211792357 1.05928972854918534985 5.49705115296459201346  
C 1.16300018338488486691 1.13284476156625868448 4.54996050957385644864  
C 1.61706047827484034052 -0.23481366214056237363 4.04113101348123038292

C 2.95064046767292165185 -0.16062073464358175845 3.30026997837064417496  
C 3.39003698364539873822 -1.52450197508573515037 2.77184839759891943345  
C 4.73748685808784841811 -1.45559474950810829874 2.06268140607667804787  
C -3.57079067375459713318 -3.00866590741213091320 1.28785864173079200867  
C -4.33175286825737071439 -4.20724623068133674053 1.18558101861055220638  
C -3.92998404424626013309 -5.37272653276296541236 0.56401052781988036955  
C -4.88750600162258397319 -6.38600400679727719933 0.58801202531269580742  
C -6.05044311013617530648 -6.02446156434394097801 1.22963919710910718486  
C -7.22806947148426637284 -6.79965219289097788646 1.43416390407802141205  
C -8.38994079730554709329 -6.43303572872451834286 2.06673528626550595533  
C -9.35488820869430171001 -7.45614934680119478827 2.08646938643653490075  
C -8.92921548590109992460 -8.59245853990063501726 1.47346318626355676784  
S -7.33232973989693004313 -8.44160893811246104690 0.85394628095032709680  
S -5.94756305653141392753 -4.39121880293431310349 1.81507217838349488304  
S -1.99071432499922074122 -2.99240026401191361316 0.53451922807130614057  
C 0.54599084643387263416 -1.01504456614647886603 -0.00268897315148748433  
N 2.30421428777512593555 -1.88008868030697651186 -1.13481603702206346185  
C 3.14646563707086857065 -2.79638997055919524826 -1.87039751567825263123  
C 2.61020362940987737943 -3.08463776554638435812 -3.28111327735335933653  
C 3.53912963007208958288 -4.06280967750768073898 -4.01095422627763475987  
C 3.42694274339765092563 -5.49553321168582709078 -3.49940921994298514974  
C 2.38276269400766693707 -1.79892411918520456204 -4.09172125697225919083  
C 3.63503784021931197756 -0.96887429519789636245 -4.37127619090613706021  
C 3.30658290841927460235 0.27476979499280956842 -5.19632971840357527071  
C 4.53844894541650845099 1.14440283116536600794 -5.41875319307685199277  
C 1.05376359465624847012 -2.22283730709353521959 -0.63289272777174476747  
O 0.55094018872436623102 -3.33000723666070452822 -0.72905734535549637787  
H 0.46387395345007098602 3.73480788888425419003 1.39804909140778965693  
H 1.19950039728735391442 6.04478670893121261543 1.95330256569179039339  
H 2.80998438456193611046 6.62970233787840079742 1.53512600265821697043  
H 2.11727086860008650859 7.02404126276347362534 -0.78680573449432356092  
H 1.10132100028044521700 7.91687989228730337743 0.34413617841715526957  
H 0.34294692224962408655 5.25272779249193888518 -0.92740557105579246588  
H -0.11841024105556795243 6.82255231477050383404 -1.57664104684798656031  
H -0.90871977724977925917 5.82298731678925740596 1.19476870236566434791  
H -1.36791104797983553709 7.35879232904796332093 0.46341670207604196419  
H -2.49987991783986363004 6.04876534031987311835 -1.39172896767060549905  
H -3.22737137844269472708 5.88937995250614232390 0.20550822399795162787  
H -2.02485488028856774889 3.72281542295752299054 0.52857817434052334349  
H -1.37621643831058371177 3.85061562579396321482 -1.10543099856891036126  
H -3.69239734972899036336 3.86540287941484761447 -2.02042475463991033635  
H -4.33421950054614768533 3.72670069053595121034 -0.38462824402135664670  
H -2.52881235259530834369 1.68910421424968260062 -1.76434372090901203656  
H -3.10964203816620932130 1.56171510748737962793 -0.10656943765628863752  
H -4.87156753421724619812 1.64108742804315754782 -2.59568990666075682938  
H -5.46274799682792000510 1.55389477081352622712 -0.93686408379023544679  
H -4.24724997828885708628 -0.59976276682968243659 -0.62133120477474368393

H -3.68851754083427652020 -0.52760700344827704544 -2.29083775744151552090  
H -6.03595724383135578961 -0.60823374532462115560 -3.09053261922281574670  
H -6.61188002126734808428 -0.62361705667214795135 -1.42307971777252029177  
H -5.44372090040127787347 -2.78829179342733368685 -1.03172916489198018830  
H -6.58693418216393222764 -2.92160788663708226309 -2.36997215747768352756  
H -4.85706088275435465818 -2.78126221906436432718 -2.69294284393678617917  
H 5.81827863806788236900 3.53861960196838598591 -1.21832675996356276649  
H 7.66575203989027009754 5.31697963163384468288 -1.64539787130733938803  
H 6.94720161347733089485 7.67781567247556395728 -0.74780282977314049830  
H -2.88307686734667134587 0.14994809909924478042 2.07575301829448877200  
H -5.23466186085707185782 -0.36718369712959636475 2.64405795241305785481  
H -5.98477866777179823288 -1.89545824378984106851 2.18392880999165894806  
H -5.00707132676695820805 -3.03484158125950598262 4.10492885859487532940  
H -5.92104014923805621606 -1.62273622579128717902 4.63398439119923111207  
H -3.71997690309276585197 -1.97631602975314990545 5.80955786850361910467  
H -2.89506618418705885531 -1.70787130409783838303 4.27908952281578347510  
H -3.95254816659827401537 0.61081354327865089449 4.21110996562119499487  
H -4.63393044993598568482 0.27999591426979647535 5.80116249460302313423  
H -2.25188189483058520679 -0.10071397092219305791 6.63125966934981825318  
H -2.65973825678974007403 1.55365316931054420202 6.18159031669344116722  
H -1.15678240675591559317 -0.40922746047257219093 4.40091584785464640106  
H -1.55032175033028218891 1.25968637627560964276 3.98849048876416389930  
H -0.20806909334684040025 2.05202085244055298929 5.92128746649589654538  
H 0.20277960465841335380 0.38606682229050143240 6.32410976348479625386  
H 1.99656426467113790046 1.59873791248610652715 5.08172682504557737815  
H 0.91684824334517156519 1.77160415417150751693 3.69884449449187568959  
H 0.86331314678517401262 -0.65339330292989605820 3.37081577093814388491  
H 1.72037581030728015108 -0.91814430493355903007 4.88779814221698227783  
H 2.86974906006732588537 0.53923285435700352153 2.46481113948829255733  
H 3.71878112064541710424 0.22444971792382029108 3.97522119023765307944  
H 3.45610053761897617619 -2.22834969395239035350 3.60534927030098506506  
H 2.63272398541728014365 -1.90725503776316496207 2.08077577721603779182  
H 4.68677051460921223480 -0.79152396092954058204 1.20168883301818718579  
H 5.03975253829554770135 -2.44208970793412660782 1.71720588706991472705  
H 5.50301800609467672842 -1.07881120355147053225 2.73765761574443722282  
H -2.96246264793789748637 -5.47444803923003942003 0.10431051305344930802  
H -4.74479351424636952572 -7.35901301552267206318 0.15238217526638411781  
H -8.53321151354288076618 -5.45830501585243865748 2.49807833933852796449  
H -10.32542182088272575413 -7.35210696903578586614 2.53762491108748511337  
H -9.45363226853091376256 -9.51807507073599445846 1.34323967741549799015  
H 4.13989745911885886898 -2.34637656674698069637 -1.91504535438013201443  
H 3.19329080238951767967 -3.73002629658682360869 -1.30443957904559248995  
H 1.63149304429124808458 -3.56553332019627111649 -3.16186754201987385571  
H 4.57240815105240638871 -3.72521573518811521808 -3.91439441671253929300  
H 3.28071019008539588313 -4.05195704107018794815 -5.07196748902984051455  
H 2.39621737657711131320 -5.83985989018483309110 -3.55368910351566968941  
H 4.04290464092412182850 -6.15747412679066385977 -4.10432078079138751292

H 3.75925440750135475554 -5.57537032886159966694 -2.46752230420348572792  
H 1.65929147851427116755 -1.17158366302601302245 -3.56110881736357365313  
H 1.92314263471977797693 -2.07721501366581629000 -5.04398134652654750454  
H 4.08555994704588965050 -0.64765635206030869320 -3.43088512229983422230  
H 4.36687371415118885665 -1.57134691869922904495 -4.91107844544720073543  
H 2.54372256789872519533 0.85924390707964848346 -4.67481184022635520847  
H 2.89109279253099860085 -0.02648244920291357649 -6.16147749557600032944  
H 5.30827006463917072665 0.58758754669263690840 -5.94903147082230798759  
H 4.28567352946846025219 2.02646946196542465657 -6.00330286728514384009  
H 4.94583524103347382805 1.46859444874825761929 -4.46307241465527582136

### TPD2T-TT

133

O 1.20006436944418704016 1.60417153745085738770 -2.70049220639409393030  
C 0.68569711952602330207 1.32779284643027573054 -1.62991595895442564768  
C 0.55548482458553805063 0.04767104820106831536 -0.94245334702986205411  
C 0.89314173044043110306 -1.27355250123628116476 -1.13841860102940328758  
C 1.56922304617819796668 -1.89908456036245110177 -2.21798238755661003552  
C 2.07641111993862637064 -1.31235643377214272753 -3.35430501909972500485  
C 2.74544686724649711351 -2.21733359791111483972 -4.20194637055450659346  
C 3.42531965779878566636 -1.82782587620175096532 -5.47689372113326999880  
C 4.44384635849439213473 -0.69034882631187077795 -5.31504004935786511510  
C 5.76629706717928858239 -1.09524491075965091369 -4.65700647855626481686  
C 5.67584453066976646340 -1.56184723714990436605 -3.20211093136986990615  
C 5.16835209158221875470 -0.48985302967612465164 -2.23942847046912607567  
C 4.88394297010206468457 -1.05795783686806554869 -0.85055394067562506422  
C 4.22649395795309690271 -0.02620507094159122558 0.06408811393260015199  
C 3.76000380791810595582 -0.63597336804577420111 1.38402554111960673922  
C 3.05015507772448790647 0.38384610204688801582 2.27204068346902898767  
C 2.51563798865685805950 -0.24187123805239915675 3.55805362640298916688  
C 1.80086647247649067616 0.77882144062351232883 4.44066054830825329702  
C 1.26630016935129030564 0.14703234601323553199 5.72044301866464888207  
C 2.70124183842921272714 -3.49375820531441849681 -3.71208095035063090350  
S 1.88117472332898549858 -3.61524829417413462451 -2.21334413343917280059  
S 0.35515524702618361808 -2.21659603676925698323 0.23681212632303832999  
C -0.33730322700482545661 -0.82902538647291945662 1.05379373974227941169  
C -0.97437828452963215486 -0.97239763770306397728 2.30642831340801146567  
C -1.10991490389714497766 -2.13519124239861390890 3.03466112576905011622  
C -1.80144453487172562234 -1.98858358102873689077 4.24075013506407749730  
C -2.08591409313541831239 -3.16348826500604163314 5.12143727791387437520  
C -3.49966761677164850397 -3.72499676849821126368 4.89670697215508443634  
C -3.79993758896717626072 -4.08587657756071376269 3.44125953253363370266  
C -3.00550131780318885433 -5.28442526644352206233 2.92289327853707492366  
C -3.26148792129381659421 -5.56021299250140188519 1.43886968481043697743  
C -2.60683715300158391770 -4.52942823417523765528 0.51917096188442846127  
C -2.94529714824977206789 -4.77526017890779019837 -0.94955481495246218948  
C -2.30261485298875623329 -3.75921092124686762048 -1.89592863109625620055  
C -2.8423548440555152811 -2.34087976230212868600 -1.71470219090310838084  
C -2.35295339564193151105 -1.39012965685085077006 -2.80533018165959280310  
C -2.85077719933039697153 0.03682906845781942773 -2.58366914057102192714  
C -2.37186192201883905284 0.98818017606172181555 -3.67395375087768405464

C -2.19949528268873129022 -0.67380405064965986917 4.44945365735446429767  
C -2.89034371327742745095 -0.06511170381370039173 5.53818858254191326296  
C -3.22287528632855924116 1.26914586147048646936 5.62477214947164849690  
C -3.88458549293010912962 1.57271664517724474308 6.81909077548817954550  
C -4.06694348760372736962 0.47905308423248244010 7.66239290959970986705  
C -4.73431894056933799675 0.79019719151847234162 8.86311977162059960733  
C -5.05076614296726411624 2.10997012415138529562 8.91591953014804516897  
S -4.55149829202503131143 3.00871386864900713931 7.51846142644293813362  
S -3.40482131171338453512 -0.95304146732104411122 6.96667832587855073712  
S -1.71816352428477259195 0.36747038830746447946 3.12929889340742573012  
C -0.13642628387889613184 0.28831755747879611596 0.27688104882135644580  
N 0.07338229755022936118 2.26081673790781945144 -0.80489628191995998829  
C -0.04183669290171437155 3.66167543715799714832 -1.14574042275153709092  
C 1.27727496935639228681 4.42798110388092069911 -0.96522568880036407890  
C 1.63199185079140152155 4.53015275985665333280 0.52426741446811486735  
C 3.09316583260011546130 4.88938770489231533389 0.76951016731085464251  
C 1.15707973947763487210 5.81281961561969673369 -1.61397122931768932652  
C 1.30699383756443321403 5.78585304466522565292 -3.13432296769510321255  
C 1.18758387878412507987 7.18242515268389336569 -3.74216957132052296942  
C 1.34034895924956320989 7.15704672182605872166 -5.25881574457167744185  
C -0.45474664232369804706 1.70257833743848951968 0.35293008742016268586  
O -1.06122887230249052237 2.32651405691428569966 1.20772918762536685122  
H 1.96048638828636634379 -0.26367872207343023838 -3.55905199929232018974  
H 2.65677545639119427889 -1.49417640324403522278 -6.18068620018378922509  
H 3.91735619721230365897 -2.70242480096029558112 -5.90663197593695610266  
H 4.67940922341428144904 -0.31319125198431330137 -6.31352311544476219041  
H 3.98700985667521035083 0.13049384048182069429 -4.76240698978234444638  
H 6.44159454864891589665 -0.23668259195400170869 -4.70673747406005116289  
H 6.21571937689540199301 -1.89905594396638255361 -5.24643468673310664485  
H 6.67153135960441812102 -1.88041518134246454785 -2.88190257931815541070  
H 5.02395543361558249984 -2.43335935552623894296 -3.14230395709454946029  
H 5.90124201674974901977 0.31723066244622633025 -2.16657216510456018810  
H 4.24233132370751420126 -0.05951704285974971503 -2.62258961112471977728  
H 4.21475897178371994301 -1.91622232652463186930 -0.95082902277471570418  
H 5.81062575245091128551 -1.41530028836156507310 -0.39592933293676896289  
H 4.93023480540901903879 0.78491219146551061137 0.26501178745042486273  
H 3.36560032504224837524 0.40848744094438993457 -0.45295211298909199282  
H 4.62029691318728730209 -1.04426988861918101925 1.91910288617248792065  
H 3.07972810497549476239 -1.46519580435483454117 1.17479429535450696775  
H 2.21867104538951087633 0.83068686374030353825 1.71846101241741444632  
H 3.74380479096951734874 1.18971167231432328748 2.52329654591184970869  
H 3.34528380389316293275 -0.68283908256986036722 4.11563233659635052675  
H 1.82095711773646229403 -1.04716373101983140081 3.30654839332098182680  
H 0.97387518069662526443 1.22344302087333467455 3.88080700122558930332  
H 2.49384621019535268616 1.58456437147532747112 4.69477082648222676653  
H 2.08028237264425674979 -0.27694396752865846345 6.30477440106528419506  
H 0.75618550783786397940 0.89021909437547119825 6.32933994321140591666  
H 0.56193468989417805215 -0.64820699532029102397 5.48616609002042832088  
H 3.1201428222929711614 -4.37853734384455872686 -4.15073134658574893763  
H -0.70924912389729166673 -3.07103628672671646882 2.68829631378598543634  
H -1.98372495097881484938 -2.88475808133319500115 6.17139481085421692796  
H -1.35024664537149963195 -3.93920055075838249081 4.90828144681971423324  
H -3.62271942258125490000 -4.60825669249278035977 5.52617167187766700209  
H -4.22807601504947605520 -2.98036660623007687576 5.22303077210055022306  
H -3.60427392308977267987 -3.21322724555636574095 2.81689049472788521911

H -4.86540456118885522585 -4.31464125933316289263 3.35632351966672892729  
H -1.93750956973780685821 -5.12072470447797201132 3.06839920232009832901  
H -3.28628661061869653537 -6.16663752660270958472 3.50362430609407349280  
H -4.33910269119667457716 -5.57431433008945909080 1.25724873580556062436  
H -2.87369264955360437241 -6.55078649783185618105 1.18817347547306506605  
H -1.52238159719226584521 -4.56733873051696281919 0.64461539871069950536  
H -2.94165561388190699432 -3.53100680177152304040 0.79940613332782661793  
H -4.03027985028379021060 -4.74707284559087838716 -1.07924235851630179184  
H -2.60660420829884342808 -5.77634234173984495442 -1.22833762500943111107  
H -1.22088909512118348744 -3.75913097852949862343 -1.74446545729257973534  
H -2.49176391993825108173 -4.07430902221009905162 -2.92529785334395597829  
H -3.93482576495486346957 -2.36621251378279850996 -1.73039257110851840693  
H -2.53699089628349216952 -1.94734162120644271887 -0.74292264210692249282  
H -2.70162165008054211413 -1.74368656581493342017 -3.77856654273206737926  
H -1.26046024316165450330 -1.38922047775297330396 -2.82978871284320687707  
H -3.94327004446240803048 0.03648322726780173914 -2.55979742010854804946  
H -2.50332323743560092311 0.39502052467968090665 -1.60976770317168882407  
H -1.28452121203605673649 1.03543145217303611538 -3.69423255136815509303  
H -2.75640717312950611628 1.99126438007779871242 -3.50099983962284388994  
H -2.71563120719565365135 0.65202741638402761382 -4.64979211644475842746  
H -2.99352469596008230468 1.98348525907686190628 4.85485646858282926530  
H -4.96389038501558133021 0.07952990371867046937 9.63507862585475116646  
H -5.55907239100356509454 2.63190331477457961640 9.70213261397873516501  
H -0.81548108638408789428 4.08096267646317123479 -0.49788264008000193694  
H -0.36195693805313394753 3.71814715920803662286 -2.18859816101462678617  
H 2.06494561682975596995 3.86414170045718075031 -1.47760544115865166681  
H 0.98395717362580492615 5.27329867234042826141 0.99468910478417771337  
H 1.42717205816782977124 3.57148233267484327413 1.00727528162686397195  
H 3.74740163350681232401 4.15723057066688372885 0.30060665476467868240  
H 3.30081687985028215948 4.90266893426792371713 1.83714274041866820752  
H 3.33227049673191277890 5.86963089853442099297 0.36526865888983073294  
H 0.19097820259172948454 6.24815978150313355854 -1.34704796758371392329  
H 1.93249900084348014140 6.46275016546137770490 -1.20660231641286697091  
H 0.54616810631527112907 5.14049393918569119677 -3.57769257120749806234  
H 2.28136258089584620379 5.36295023251652303031 -3.39054532818591569665  
H 0.21402594456443782556 7.60564484099149762386 -3.48309951884720225834  
H 1.95496252801383030295 7.83020825258860941886 -3.31152977409486704019  
H 1.25214233784266104621 8.16046123573728010570 -5.66965599438648837349  
H 2.31236422631660731852 6.75512452135819874144 -5.53754072992521884089  
H 0.57156355343514031464 6.53217560948914943708 -5.70916496899559522404

TPD2T-CPDT

210

|   |                   |                   |                  |
|---|-------------------|-------------------|------------------|
| O | -5.15232523386149 | -1.16414878694200 | 1.74810748877425 |
| C | -4.09065993873023 | -1.00086961778779 | 1.17186070174513 |
| C | -3.06058576718595 | 0.00875279705073  | 1.37006807320624 |
| C | -2.85379891454912 | 1.10389291613759  | 2.17308163701307 |
| C | -3.66693722732385 | 1.66677613496495  | 3.18763135389394 |
| C | -3.39007394116113 | 2.78458181886041  | 3.94185491848253 |
| C | -4.42450519213995 | 3.13293165092794  | 4.82919428459469 |
| C | -4.39782031089065 | 4.34613396468275  | 5.70608475735189 |
| C | -4.25186961411283 | 5.62101236179808  | 4.86597216039654 |
| C | -5.42779247362621 | 5.81066640980205  | 3.90778580257435 |

|   |                   |                   |                   |
|---|-------------------|-------------------|-------------------|
| C | -5.15153022867458 | 6.81833894803819  | 2.78967473090986  |
| C | -4.07054302266226 | 6.40156554655538  | 1.78764036542148  |
| C | -4.38518803352778 | 5.10663570978721  | 1.03957000431502  |
| C | -3.31548481663040 | 4.78798403003248  | -0.00332270583344 |
| C | -3.60639111924082 | 3.50374345159088  | -0.77751568653150 |
| C | -2.50125516659405 | 3.18773810951768  | -1.78331109163999 |
| C | -2.73180428167278 | 1.87003463682454  | -2.51941621292900 |
| C | -1.60763015958228 | 1.55931703139996  | -3.50553673097515 |
| C | -1.74614212881382 | 0.16624354976336  | -4.10776815797957 |
| C | -5.46906438336321 | 2.25424770011573  | 4.74133862886940  |
| S | -5.22952693106852 | 1.00253898288015  | 3.59013452206225  |
| S | -1.32455210592738 | 1.85276911492157  | 1.73666607957520  |
| C | -0.99333409487915 | 0.68038129389684  | 0.47071884969785  |
| C | 0.17602538069444  | 0.76151096431147  | -0.31112367327575 |
| C | 1.11577056049887  | 1.77434392098634  | -0.32375330156570 |
| C | 2.18349785150864  | 1.56160227382964  | -1.19675221795302 |
| C | 3.32590285726045  | 2.52107977541587  | -1.30522547689760 |
| C | 4.34443465778737  | 2.54312054595190  | -0.15564150822273 |
| C | 3.78331185377296  | 3.10028032602187  | 1.15030863926258  |
| C | 4.88137534421479  | 3.49370129523294  | 2.13626994262367  |
| C | 4.33911869953215  | 4.20455824199559  | 3.37489533863498  |
| C | 5.44295281628581  | 4.75127677621011  | 4.27773193514263  |
| C | 4.89977407758441  | 5.56786252332862  | 5.44900919735041  |
| C | 5.99045929006621  | 6.22463097478646  | 6.29268571876822  |
| C | 5.40339116024450  | 7.09299984032224  | 7.40399408381846  |
| C | 6.45501567227679  | 7.73922002937893  | 8.30363025379410  |
| C | 5.82182075525660  | 8.64122251128401  | 9.36154984990598  |
| C | 6.83050433102911  | 9.27998255371828  | 10.30973847172735 |
| C | 2.06728598668143  | 0.35054138019490  | -1.87371784877908 |
| C | 2.91713303468797  | -0.27953246375385 | -2.82209093218659 |
| C | 2.68702544828497  | -1.52371342534661 | -3.38980940627162 |
| C | 3.69224708138856  | -1.91189055361635 | -4.26487545608280 |
| C | 4.69707284691913  | -0.95684636122532 | -4.38975964352306 |
| C | 5.67784622026434  | -1.44155362817449 | -5.29469899781847 |
| S | 7.16092863662829  | -0.91526894689768 | -5.98875943691365 |
| C | 7.27447115421228  | -2.40346325129804 | -6.86409596537622 |
| C | 6.23236671599940  | -3.25284631667695 | -6.63193362737164 |
| C | 5.30801314098451  | -2.70642935003356 | -5.72958406826671 |
| C | 4.01213436679665  | -3.13685969700269 | -5.08672197767628 |
| C | 2.87592563316546  | -3.43910676858632 | -6.07776730924112 |
| C | 2.41813902178944  | -2.20543741907524 | -6.85327245812229 |
| C | 1.30888530832055  | -2.54374252478286 | -7.84697362274686 |
| C | 0.53928076525711  | -1.29262828783640 | -8.26588502074116 |
| C | -0.56411242089367 | -1.58341947932184 | -9.28186143661463 |
| C | -1.73466007236826 | -0.60487980086758 | -9.17048393498499 |
| C | -1.34997474339073 | 0.84797890069238  | -9.44924774589835 |
| C | -2.51186911961872 | 1.81170732929326  | -9.20100924594631 |
| C | -2.74131268600478 | 2.08626887126347  | -7.71554725734043 |
| C | -4.00709985600716 | 2.90131582752543  | -7.45621716093203 |
| C | -4.24697043003664 | 3.11634456217438  | -5.96296903024235 |
| C | -5.55251286844921 | 3.85355220724104  | -5.68646612112016 |
| C | 4.25157767520490  | -4.40649888931282 | -4.24203362399449 |
| C | 5.43332297809978  | -4.29896808413282 | -3.27523686120164 |
| C | 5.42375569824521  | -5.34385213762577 | -2.14818690163870 |
| C | 4.96569740245612  | -4.75860695514227 | -0.80917508140623 |

|   |                   |                   |                   |
|---|-------------------|-------------------|-------------------|
| C | 3.49314285686842  | -4.35606013142753 | -0.77796822316748 |
| C | 3.11656377749165  | -3.62282765664433 | 0.50926348692723  |
| C | 1.60870876589489  | -3.38116980475803 | 0.57679586312793  |
| C | 1.19786164278793  | -2.19615432405966 | 1.44929127832140  |
| C | 1.38662770275740  | -2.39729458095705 | 2.95081549303356  |
| C | 0.84724645225017  | -1.19488259355221 | 3.72364888866420  |
| C | 0.91323620072936  | -1.35932602947389 | 5.24070886541782  |
| C | 0.32972165767458  | -0.14314833814569 | 5.95123767260536  |
| S | 4.41569465727513  | 0.42402006581308  | -3.41310694540451 |
| S | 0.61048701458936  | -0.50105582751428 | -1.42362823242445 |
| C | -2.02630862944076 | -0.23016325551811 | 0.42444144513462  |
| N | -3.63299196136736 | -1.79465427008533 | 0.12830999141925  |
| C | -4.36552194040069 | -2.92931992480103 | -0.38777226491539 |
| C | -4.36182113866060 | -4.13656916764180 | 0.56328570828103  |
| C | -2.94032426395649 | -4.62991007113572 | 0.87049308687599  |
| C | -2.17462727355287 | -5.18437778362947 | -0.32626120214978 |
| C | -5.27636081402060 | -5.21638766223634 | -0.02736803945118 |
| C | -5.45883233936061 | -6.42744270365408 | 0.88667004165810  |
| C | -6.59372462346758 | -7.34821292779863 | 0.43348062935489  |
| C | -6.31992996332480 | -8.03364699217657 | -0.90114984002808 |
| C | -2.40190480038890 | -1.38277665547901 | -0.37221696512323 |
| O | -1.82776718130913 | -1.91583344137631 | -1.30824650181444 |
| H | -2.46701965333301 | 3.32673786108908  | 3.84147024156536  |
| H | -3.55164274311051 | 4.27330367128112  | 6.39413673550045  |
| H | -5.31481934385164 | 4.38952997287403  | 6.29554980027213  |
| H | -3.32417316951075 | 5.55949389460208  | 4.29886497822999  |
| H | -4.17926200807294 | 6.48377855746315  | 5.53120397986962  |
| H | -5.68895594485772 | 4.85006932036512  | 3.46247524710021  |
| H | -6.29881895148207 | 6.15078289366267  | 4.47364352544533  |
| H | -6.08026170986723 | 6.98362033853009  | 2.23758285740485  |
| H | -4.85925854490709 | 7.77289393875818  | 3.23506104400405  |
| H | -3.96475235967351 | 7.20700595289612  | 1.05595584259529  |
| H | -3.10920490211039 | 6.29595954673461  | 2.29301512744021  |
| H | -4.44926497617395 | 4.27313219439618  | 1.74105587959623  |
| H | -5.35729565114701 | 5.19962369770686  | 0.54883120692784  |
| H | -2.35042393392918 | 4.68659667123777  | 0.49882761546144  |
| H | -3.23916998353895 | 5.61814805117173  | -0.70975909567262 |
| H | -4.55717540848531 | 3.60004869974668  | -1.30760305198269 |
| H | -3.71173477781342 | 2.67140571243753  | -0.07620461885762 |
| H | -2.43427781677541 | 4.00031342095603  | -2.51062209742693 |
| H | -1.54394665060357 | 3.13209919823787  | -1.25898200683199 |
| H | -3.68297723190382 | 1.90360524309607  | -3.05667002970729 |
| H | -2.79959022490285 | 1.05636031588501  | -1.79180831508959 |
| H | -0.64747991992270 | 1.63536768792015  | -2.99003672920225 |
| H | -1.61336577437957 | 2.30388934226805  | -4.30515829903985 |
| H | -2.70600795532717 | 0.06078346593753  | -4.60959671760224 |
| H | -0.95409581696819 | -0.01525720954405 | -4.83077231272645 |
| H | -1.68014630175056 | -0.59614939747264 | -3.33318958861789 |
| H | -6.38622740564776 | 2.27918042947961  | 5.29695233171485  |
| H | 1.01875519773936  | 2.64798791982845  | 0.29709033687888  |
| H | 2.90599304604899  | 3.52828024397862  | -1.32342683993430 |
| H | 3.86018515663323  | 2.36948566628060  | -2.24428293158149 |
| H | 5.17161855242661  | 3.17573580028875  | -0.48304158205624 |
| H | 4.74944558114017  | 1.54968964825765  | 0.04575888405870  |
| H | 3.12690123882608  | 2.35922897577338  | 1.61201697757778  |

|   |                   |                   |                    |
|---|-------------------|-------------------|--------------------|
| H | 3.18633548012643  | 3.98968803331350  | 0.93460824807657   |
| H | 5.58296685028054  | 4.16070553212686  | 1.62948920746512   |
| H | 5.43959838317247  | 2.60467590604219  | 2.44028784091613   |
| H | 3.71327549813812  | 3.51145696540012  | 3.94226242852589   |
| H | 3.70451896555906  | 5.03431416796238  | 3.05381326852724   |
| H | 6.10565736499875  | 5.38328901018279  | 3.68145853807722   |
| H | 6.04286010592416  | 3.92223018814604  | 4.66138357622570   |
| H | 4.23811038580932  | 6.34760311007292  | 5.06352686355084   |
| H | 4.29672057226730  | 4.92286413546978  | 6.09288940136856   |
| H | 6.62294109795606  | 5.45210210781880  | 6.73725907811016   |
| H | 6.62265223857426  | 6.84162650390142  | 5.64927296882080   |
| H | 4.79041813115498  | 7.87797464425533  | 6.95382664084108   |
| H | 4.74269111895922  | 6.47907532009473  | 8.02137069991421   |
| H | 7.15190608593475  | 8.31843357632275  | 7.69260629310412   |
| H | 7.03394599510951  | 6.95622765443697  | 8.79996427696011   |
| H | 5.25486351772740  | 9.42909318783437  | 8.85950065257592   |
| H | 5.11173993065738  | 8.04986957601825  | 9.94491993778321   |
| H | 7.54507707845318  | 9.90344581160016  | 9.77594515839892   |
| H | 7.38335727332424  | 8.51381551938640  | 10.84979346265978  |
| H | 6.31645768526783  | 9.90262239914894  | 11.03891450464959  |
| H | 1.81043621487713  | -2.10175273260265 | -3.15650496112407  |
| H | 8.12060416002995  | -2.55684639398399 | -7.50427265808485  |
| H | 6.14537490692095  | -4.21989631636895 | -7.09339512798871  |
| H | 2.03337102605026  | -3.83600969884874 | -5.50770835002278  |
| H | 3.20802147956965  | -4.20716651480667 | -6.77904417597003  |
| H | 2.03133492079590  | -1.46801038666377 | -6.14625495841286  |
| H | 3.26734355787494  | -1.75351490931781 | -7.37109466978053  |
| H | 0.61191403260005  | -3.23864078394732 | -7.37175771742798  |
| H | 1.72765000615040  | -3.03805054260086 | -8.72701776975208  |
| H | 1.24025147501444  | -0.55672140359515 | -8.66351482209338  |
| H | 0.08796154634679  | -0.86059350455866 | -7.36922352640651  |
| H | -0.15662424156499 | -1.56329214573808 | -10.29573532416022 |
| H | -0.95054109769274 | -2.59065952289678 | -9.10438924384679  |
| H | -2.52058036561094 | -0.90079583493652 | -9.87043079858138  |
| H | -2.15444996158271 | -0.68277564227182 | -8.16605448952239  |
| H | -0.50833138412760 | 1.13766462276856  | -8.81754930655691  |
| H | -1.02587895574272 | 0.92881358062489  | -10.49024915612760 |
| H | -3.42291237086380 | 1.39365572140939  | -9.63679394830947  |
| H | -2.31399325805248 | 2.76220992896576  | -9.70397079642735  |
| H | -1.87405520245386 | 2.61457011693074  | -7.31137085144287  |
| H | -2.82867812136152 | 1.13894753960663  | -7.18056374055014  |
| H | -4.86350053245152 | 2.37783459247474  | -7.88894357760651  |
| H | -3.92850942692408 | 3.87149547132508  | -7.95360498747104  |
| H | -4.26481369861043 | 2.14611057863061  | -5.46038689837723  |
| H | -3.41496426710492 | 3.68935653193170  | -5.54624346518382  |
| H | -6.39915251840481 | 3.30228850184631  | -6.09099795535612  |
| H | -5.70531843088184 | 3.96907794006347  | -4.61553126077882  |
| H | -5.53755310081947 | 4.84272243863025  | -6.13993082286296  |
| H | 3.33106673939967  | -4.61146146531480 | -3.69482861794040  |
| H | 4.42294506749073  | -5.24238541447432 | -4.92297588083422  |
| H | 5.44089220763540  | -3.30482058314922 | -2.82520893458239  |
| H | 6.35671634319070  | -4.39170020526767 | -3.85041544002316  |
| H | 4.78529769081513  | -6.18473452296966 | -2.42619152387058  |
| H | 6.43601735965245  | -5.73028325645834 | -2.01156074223095  |
| H | 5.58123508265688  | -3.88320885700242 | -0.58581980925872  |

|   |                   |                   |                   |
|---|-------------------|-------------------|-------------------|
| H | 5.14665873832662  | -5.49590697483174 | -0.02237601720864 |
| H | 2.87047261768640  | -5.24792516231475 | -0.88562817539174 |
| H | 3.27964705744627  | -3.69684003897523 | -1.61978586417881 |
| H | 3.44690519141622  | -4.20207076123947 | 1.37388204767879  |
| H | 3.63836429883455  | -2.66301480573369 | 0.53498999799462  |
| H | 1.10861128395630  | -4.28331487806881 | 0.93546370912697  |
| H | 1.24084627194440  | -3.18450819931248 | -0.43309944323361 |
| H | 0.14016624781420  | -1.98916023605985 | 1.25933086477518  |
| H | 1.76341133360308  | -1.31449253436314 | 1.13713013028500  |
| H | 2.44584256048596  | -2.53105702160733 | 3.17775801667675  |
| H | 0.85753968267029  | -3.30033619658807 | 3.26520892792965  |
| H | 1.41777004556698  | -0.30606592359970 | 3.44255704761596  |
| H | -0.19378214376944 | -1.02630591696991 | 3.43347955283966  |
| H | 0.35657808905502  | -2.25265641626513 | 5.53409548088433  |
| H | 1.95263260329370  | -1.49950447316673 | 5.54704640353015  |
| H | 0.37491830274489  | -0.26287283572742 | 7.03147874574790  |
| H | 0.88231418934491  | 0.75562146048887  | 5.68465501282321  |
| H | -0.71156697417220 | -0.00262343884429 | 5.66721805253995  |
| H | -3.91061981776348 | -3.18277625455380 | -1.34697656074941 |
| H | -5.39988477951926 | -2.61068434124122 | -0.54865015714849 |
| H | -4.80190608068093 | -3.79778897134625 | 1.50967252948245  |
| H | -2.36992877218343 | -3.79746651587343 | 1.29384401362303  |
| H | -3.00474338964086 | -5.39662803973399 | 1.64465418398047  |
| H | -2.00339878020262 | -4.41214659673949 | -1.07223523864201 |
| H | -2.70937836624381 | -6.00924227026282 | -0.78801680094096 |
| H | -1.20426151533303 | -5.55092308806258 | 0.00160028582050  |
| H | -4.88008539343429 | -5.53076074833112 | -0.99257822438844 |
| H | -6.25707820782677 | -4.76697870413971 | -0.20373672948359 |
| H | -5.68126578007162 | -6.07358615162837 | 1.89681260803332  |
| H | -4.53429084592683 | -7.00512301440507 | 0.93214823104970  |
| H | -7.51920426841745 | -6.77203678561854 | 0.36010512762205  |
| H | -6.74334817106382 | -8.11515728832089 | 1.19777152668821  |
| H | -7.11773495925537 | -8.73569755363741 | -1.13445785733760 |
| H | -6.26358025573558 | -7.30689276944177 | -1.70738632560730 |
| H | -5.38075820741313 | -8.58216852558848 | -0.86331632535080 |

#### TPD2T-DTP

173

O 0.99161933047401273900 -1.34310914381984636279 5.97548277970617114363  
C 0.79814403022636659646 -1.51844954856521296982 4.78474471536842482777  
C 0.72538211788720352580 -0.56161728050747949936 3.68699140734159458432  
C 0.85752973553998090850 0.79689523447944232704 3.50192383438546794849  
C 1.16742004684482481025 1.82747394891034553588 4.42869170737266326654  
C 1.52073668585172594447 1.70173733038761065828 5.75112903126313046442  
C 1.74427040750489448229 2.93721425534249602762 6.39299377055280437787  
C 2.09182302097967243171 3.06438538406580684992 7.84319580550570627508  
C 0.98356543084022884926 2.46983070497914702912 8.72095087860440187910  
C -0.32642655792971980722 3.24733016212920544419 8.59094541695146141080  
C -1.54729295219946250128 2.47213713538667212433 9.09141943805180474669  
C -1.87992482109684022618 1.21157800369684021113 8.28706359502875500311  
C -2.16403589659680894997 1.47920924069855930227 6.81052437238788144214  
C -2.50748058335240209260 0.19590333958870453923 6.05756614817450333987  
C -2.77579665745961534640 0.45625576759397867832 4.57704794480779231236

C -3.06625184670709316492 -0.82991316072193288544 3.80731168949724319006  
C -3.32214255237817734923 -0.56568852284784776341 2.32504925332377565539  
C -3.45995795843227504918 -1.84374956393987066150 1.49711768317739135625  
C -4.72349245881101165168 -2.63501438029412682340 1.81614869343922835654  
C 1.55934495024003005881 3.99027292840493785775 5.54187563123455984027  
S 1.11393803629971177571 3.50771298328385938703 3.95814002182040836075  
S 0.55979849692934136041 1.17757124281182146142 1.81886685008238013772  
C 0.25044790903966751561 -0.49162886552879780933 1.38264939827320243459  
C -0.06412647986956554469 -0.83021782056967796670 0.04650178832345810975  
C -0.42041213888342443550 -2.05463749833599917949 -0.47600374640020748362  
C -0.68815926666359317210 -2.04418501447762590573 -1.85089838509765702845  
C -1.20125035491132847731 -3.26940011890586434973 -2.53942536689148390394  
C -2.68081039515338703794 -3.50871437858464796378 -2.19316382175293123069  
C -3.60302340352994399097 -2.39463739154773636031 -2.69190574352773692723  
C -3.85881045797445709766 -2.45679763894322000795 -4.19917046190865050903  
C -4.28964806071479998195 -1.10505856820636227944 -4.76429683773912682199  
C -4.41123426737351209681 -1.12841292246134194954 -6.28617007625837764806  
C -4.65067551410347412855 0.26392745589010507823 -6.86519037132777398824  
C -4.74213393149221573708 0.24151894668908172048 -8.38878985871468074720  
C -4.90329381998390623210 1.64007518010987229928 -8.97958667416876110678  
C -4.96557272715331521340 1.61256563770210159525 -10.50488449286654812909  
C -5.13760551377235241688 3.00676912982829858123 -11.10418192737225950850  
C -5.18103030404130393549 2.97064030537333456650 -12.62766298069161052808  
C -0.52182770447951831727 -0.78668454905422913193 -2.41444973237299764790  
C -0.65514464105398739768 -0.30210098003693264257 -3.74885030271717134553  
C -0.73284379181760783695 1.03257730803566949440 -4.08681649408222291697  
C -0.80692332834159508081 1.22704209257388718868 -5.46860723795972791805  
C -0.79056634814248039067 0.02377876587203353945 -6.20407714624359662992  
C -0.87927890292526678095 0.38061166741416291304 -7.55234168197532085287  
S -0.93098536450360980243 -0.30197726040179756479 -9.14024677962430409650  
C -1.03350629762198309436 1.29422677294872823239 -9.82071955978217125960  
C -1.02884469434517211717 2.29751254724996867296 -8.90441228051245481367  
C -0.93976782089769084205 1.78662987182425769817 -7.59356501187245314100  
N -0.91140596380203819926 2.29368842893318847231 -6.32204945743758273125  
C -0.76319780790126967585 3.68162666564747675935 -5.96403743400197505764  
C 0.67532610501815015791 4.17426216483660006418 -6.17678359456758485635  
C 1.70451295465302998799 3.41763519322487141494 -5.33440731812243029708  
C 1.70141664185792951258 3.81492044735064883554 -3.85794598064286997641  
C 2.51744818769577349826 2.83583554650845703904 -3.01564847979720918048  
C 2.65392555944128760714 3.28639595809908557911 -1.56292460345900008356  
C 3.37041702491863759406 2.24225560045293592637 -0.70933890414894362753  
C 3.64943726424387815399 2.74533344700544068573 0.70480407434643188580  
C 4.24371438599546912940 1.65680661867684264621 1.59603211884863527281  
C 4.60891523386833501519 2.18693345138178418807 2.98087213955238361507  
C 4.97817326205370491721 1.07083029796948014933 3.95506642369590277752  
C 5.36321074228547800544 1.61942156961564220907 5.32378284538356094657  
S -0.65915779685471587168 -1.34928992730310692849 -5.16890591684978595310  
S -0.04675092583407913782 0.37952002543927021438 -1.20407698295838705427  
C 0.38017367734938040114 -1.28083881430383805800 2.50689348894647645594  
N 0.54979652393411548861 -2.75936428822950574613 4.21579699554836562214  
C 0.51474859543689277519 -3.99164764524202775320 4.97419768905376447066  
C 1.87404027109464554890 -4.70902344317398924289 5.06556498369264573967  
C 2.36883284933496440772 -5.20354184179040046843 3.70121713534681040514  
C 1.51891188287543288382 -6.32320330925160245528 3.10979085110890096644  
C 2.92390587516130606716 -3.81244055916067914325 5.73934508697295786561

C 4.06574086053564442977 -4.59743123099174866297 6.38239555139711978171  
C 5.09168342720793365430 -3.67005951184876000326 7.03138597504489837320  
C 6.21703704005095048046 -4.44727510962981398279 7.70484646721542443260  
C 0.22301805504423269366 -2.68123467176900875941 2.86651427593509211533  
O -0.15770005484926183370 -3.63155271802357582089 2.20337054404347432168  
H 1.61031997718832942112 0.74658559267991730923 6.23464752055347926074  
H 2.24476606901774555780 4.11573498807617976780 8.09313622136129140472  
H 3.02292980936118649282 2.52556011447520800672 8.03620797737477232658  
H 1.30879807374752465954 2.46921030588950252138 9.76321950120462034306  
H 0.82926995434449879419 1.43388083735158655685 8.42099450329389398462  
H -0.24755663482000764275 4.17826986943233968930 9.15841682522247069187  
H -0.48301546751970358962 3.52010125014226771256 7.54660051982630708522  
H -2.41270759774099419204 3.13946615457297006913 9.06451699133373445250  
H -1.38450813073359002559 2.18477452574857577972 10.13341162318793031716  
H -2.76049205071839365289 0.74417509150827398923 8.73605896929034209109  
H -1.06321698347976645316 0.49119449988191354883 8.36243250290704409622  
H -2.98953200721067835488 2.18946464074402324940 6.71911745079372213496  
H -1.28404773554327955587 1.92146059924795542528 6.34126656727185356033  
H -1.67341403855957859825 -0.50470824347297604806 6.15465887138251055433  
H -3.38560788089942299450 -0.27252027542023837814 6.50894021596120264661  
H -3.62537318788772600087 1.13586559162240208209 4.47653949752085456026  
H -1.90512296549191506578 0.95020429183185040056 4.13809875808374716399  
H -3.93378681707616850716 -1.32078113590927515020 4.25125329985505739927  
H -2.21562185483890239368 -1.51067104459276291273 3.90856663829690020862  
H -2.48910629420713513937 0.01910156260834943234 1.92606113255513733407  
H -4.22750006251115095779 0.03593616275191501702 2.21601375429108315984  
H -3.47134788132161364871 -1.57176657826882104629 0.43895675677195605813  
H -2.58365394029872463832 -2.47495582585499285244 1.66424032148127243325  
H -4.71031898593510334194 -2.99249450679426276523 2.84262289331894368871  
H -4.80240091425194126629 -3.49920070970888419382 1.16008687259731368968  
H -5.60643458334508615337 -2.01444705710705562751 1.67624631910412147384  
H 1.65812467246191275194 5.03534656023541948855 5.76160730419043698447  
H -0.48950296203055798649 -2.93860790714018804692 0.13189587104876401846  
H -0.62228340450720098787 -4.12900444419300249876 -2.19502080318511794133  
H -1.07797082310570391250 -3.19051871476519277593 -3.61703691170610674988  
H -2.76914589870430827290 -3.58794760871107909495 -1.10770461207307069351  
H -2.99372491449756417126 -4.46045141536742661970 -2.62645937050214151043  
H -3.15631365653026341178 -1.42934303206083801463 -2.44166108456790231784  
H -4.55684637093013211739 -2.45463275748125653308 -2.16332856006426421658  
H -4.62304519502269783970 -3.20712687400415852323 -4.41266166280390326193  
H -2.94759820609976674888 -2.76748257526026275599 -4.71143986097997391482  
H -5.24248370530702878511 -0.80456248574312805300 -4.32201549286610386957  
H -3.54685984395436326722 -0.35363140502894563344 -4.48309533567596307790  
H -3.48942551289690872096 -1.53343838456603975828 -6.71122885526979384707  
H -5.22748687086278618352 -1.79254428735282012042 -6.57902109063405404754  
H -3.82860355192867185536 0.91942975522505032693 -6.56574416225886459131  
H -5.57218147876582925448 0.67934948267285233392 -6.44993895552875518007  
H -3.83688163688109673544 -0.21644913007326022081 -8.79373647797565283213  
H -5.58776980074185569691 -0.38048067279935499085 -8.69165944535390266878  
H -5.81543674961944567769 2.09658889813419291315 -8.58700604366347519658  
H -4.06009157361917250029 2.26026909582907098439 -8.66511378459298065025  
H -5.79894180492738531285 0.98018757609299134170 -10.82058825939365398483  
H -4.04754028173406688040 1.16348868853553333302 -10.89129669239024877925  
H -4.31070509383867062070 3.64318109875634865702 -10.78039617820047446628  
H -6.06231180147988091278 3.44941925404969618185 -10.72588683766787376328

H -6.01029316535767588192 2.35539430704753449675 -12.97087027602866626808  
H -5.30669045164622144028 3.97280719547494465260 -13.03205373160235680530  
H -4.25866292899959919538 2.55240263258759858545 -13.02585362163122795209  
H -0.74161283334625405228 1.81073425631938000890 -3.34614592112348852027  
H -1.08996348260636932714 1.38420627177086652537 -10.88733883473393682095  
H -1.08511439431033407388 3.33945873212264698893 -9.16086949143815765240  
H -1.05481682133865173334 3.79023602371135481803 -4.91877970968490885184  
H -1.44602396078212103170 4.27365734982686795718 -6.57995372631453623313  
H 0.92579577810914304159 4.05323736887602237289 -7.23292244139007589609  
H 0.71517277269030332665 5.23848493081349353417 -5.93952986374529601221  
H 1.52088526532394174851 2.34435703068145917527 -5.41923853069128558246  
H 2.69973884966890986803 3.60446182831850503447 -5.74401624101803154332  
H 0.68049637830414233530 3.84016461258361241349 -3.47452354513751737741  
H 2.11496174520083313197 4.82072362207421445390 -3.75323051849578037675  
H 3.51329116561585230727 2.72607343550796299425 -3.45231980193499632392  
H 2.03647371189470360875 1.85463444069658001112 -3.04188827283869800411  
H 1.66269823520898740732 3.46907634276722598443 -1.14253479267985902368  
H 3.20961042069990876158 4.22647706798019218155 -1.52743687402242422912  
H 2.75350180110108855303 1.34222269560204399141 -0.65696008165987429539  
H 4.31447410000389819373 1.96809813306402880961 -1.18690056507668195707  
H 4.34035084975898310944 3.59029416927857969455 0.65851363078077185254  
H 2.71773835135896257853 3.10198337879472552103 1.15006554863976195868  
H 3.52003673819017359747 0.84408423615012728725 1.70001620287884303018  
H 5.13468548398178548098 1.23905030919066660999 1.12062139486019574086  
H 3.76200217170088224705 2.74413629708246853411 3.38588569791089843974  
H 5.44636270604139038909 2.88284575574794788011 2.89273043457790457467  
H 5.80881415999381811588 0.49005445730090890777 3.54633107544859216276  
H 4.12550997061433388780 0.39529177737172110918 4.06552921425529589783  
H 6.23952582207880546150 2.25962860026490908183 5.24617450766068138535  
H 5.58819978341084766527 0.80818990054619110897 6.01277318947702976715  
H 4.54480955813086939798 2.20527897370442982350 5.73677376989266196716  
H 0.17356154275007767973 -3.73742591133459489683 5.98165804920538590750  
H -0.21957630350459872437 -4.64216913297275102224 4.49454144568546087868  
H 1.70490515295487510272 -5.58095485078187092398 5.70710198248201550086  
H 3.39099712127998209610 -5.56687821112109126886 3.82030290276329775878  
H 2.40086238106125682279 -4.36652495973830312437 2.99876699998203344322  
H 1.38190794097081126601 -7.12449674737514460077 3.83293092704850613117  
H 0.54445732273410107904 -5.95070021879661403830 2.80497257894415685797  
H 2.00674115894245730374 -6.73376288062938765933 2.22827895740143677727  
H 2.44115272360673785101 -3.21299753778390506653 6.51402608287294526690  
H 3.33331402600566795158 -3.11706656704640527877 5.00089336836530229391  
H 4.56770970461724346023 -5.21311981851156946988 5.63347094941407267044  
H 3.65575704064850270925 -5.26732637730485819816 7.14197544014953589198  
H 5.51169061431055329336 -3.00950140441623181786 6.26870687829674810843  
H 4.58979079010848423081 -3.04117212712159323829 7.77074464503181960850  
H 6.93637803232743266335 -3.76637923463354518105 8.15463911851120570873  
H 5.82014086928085383477 -5.09286824031083273923 8.48562266320268143716  
H 6.73873144270159141200 -5.06852240974564605125 6.97954912582156072887

TPD2T-EDOT

136

O -1.52970852312839844522 -0.18476670830879454721 -3.52642580390120707889  
C -0.91070218136825564770 0.12476741019313565551 -2.52277408953186466078

C -1.27672999863805269882 0.00779070862815727135 -1.12124593189754961919  
C -2.34601940885033188877 -0.46483972273877666170 -0.40025854005175098838  
C -3.53475671293676452223 -1.10188297178416672040 -0.83455656668877364890  
C -4.57102631786790514212 -1.54249963149543090069 -0.04176741321829787607  
C -5.59128349741968566633 -2.18910216550856207007 -0.76167787513067286564  
C -6.79242462620800679929 -2.81544337061981142512 -0.12442673961391034765  
C -6.37182255572720812609 -3.89979069554053792146 0.87585572671917932830  
C -5.62402338760404774121 -5.04537509167817699307 0.19320138235256414938  
C -4.83904629725059542977 -5.92683556072220341093 1.16731871148071419952  
C -3.66398211783098926020 -5.23025438189602809302 1.86074855737552113943  
C -2.60494814277946051817 -4.69884149378751381221 0.89596834324038865383  
C -1.41253258271494330778 -4.09595482079666517450 1.63623473439165922905  
C -0.35116133753661099570 -3.55977873195998606448 0.67754338714061645987  
C 0.82248367183635595623 -2.92386587893284488615 1.41970125301753147262  
C 1.86899552084544007258 -2.34854739374693233245 0.46853513495136944744  
C 3.04738774750187202400 -1.72479694924803395040 1.21330394929789808778  
C 4.02652184806242630088 -1.04983429485130730363 0.26013902717044129487  
C -5.31009004461117850582 -2.21916437261281762616 -2.10057562161991295824  
S -3.82080212364618798659 -1.47435997975618704459 -2.51364295802883352948  
S -2.03587315567699533858 -0.20885753434468146139 1.30797040214874593644  
C -0.46896273727423437583 0.52694034844971504583 1.02164367019224999744  
C 0.31183088462173208510 0.99700641609971940582 2.10319435972772028620  
C 1.55548287831898268685 1.58760826347322003826 2.05215441063726355964  
C 2.03956134607256256430 2.01845916074424325259 3.29344507107060069373  
C 3.34582556431193856028 2.73646877968887203281 3.42555400314721891775  
C 3.50789778364843041203 3.92124941938644377970 2.46295077668227468948  
C 2.69256635239660901959 5.16049443928088269473 2.84197070002371132702  
C 1.17313410116327121457 5.01074923672337391167 2.74094735522376486969  
C 0.67275944026397060949 4.78955091969849089395 1.31454963053521645122  
C -0.81119421025954485671 4.43161958312629167267 1.27722844252104383855  
C -1.27879445084896037343 4.08770079663813223902 -0.13570849745254875973  
C -2.69904540170698714618 3.52773289928198252596 -0.15500939324300608280  
C -3.14580209693060730558 3.12966865228282697942 -1.55995229351106079463  
C -4.53486221157262914261 2.49602554043195157263 -1.56622996568322836453  
C -4.95424567633635248853 2.04442274608686114235 -2.96317932084591673103  
C -6.33763081736093614182 1.40468633420970978598 -2.96146009179046831861  
C 1.17178509426770505186 1.70355004088127182094 4.33238520011127015152  
C 1.27008249779577453431 1.90432197444546114085 5.74012593247719937750  
C 0.30267329500546613641 1.54186011710345227677 6.65733082606046178142  
C 0.64610112791950591316 1.83146610896280082059 8.00253665981306738786  
O -0.19149912467119351023 1.56122459568937910213 9.04897127609352125432  
C -1.52315484901021691577 1.30855144562719027945 8.61640723248232553999  
C -1.53732299757575008314 0.36041202191227128537 7.41873791358757284087  
O -0.87411881288408899149 0.94910502074480695978 6.30672640669944950531  
C 1.87833408666351653338 2.39862679277633450425 8.11962530133413551425  
S 2.62833287074897592461 2.59830752136772069605 6.58694220932119911538  
S -0.27005344886147653050 0.91659009382536738020 3.74437081795624848723  
C -0.22591025766869549107 0.55965396069275352708 -0.33573374134635625143  
N 0.34450936137620602473 0.71725227383769041278 -2.52567409879502413617  
C 1.10016691597778359935 0.97996094967234859130 -3.73037856928681055280  
C 2.29115951972691345162 0.02372228379748625784 -3.89099416130431841054  
C 1.85182932102854791445 -1.44842874473336680197 -3.91664602567948616496  
C 0.96349392213362317072 -1.83680176960227181659 -5.09436988991035377694  
C 3.10548782599434813889 0.39996283215499789376 -5.13528468963821982385  
C 4.01235868781777149650 1.61108347498178372526 -4.92018658181708978816

C 4.83975728278642058910 1.92672408112232163013 -6.16538134609225441096  
C 5.75369759926776414005 3.12812463207961721778 -5.95205873039861454998  
C 0.81280480479078021094 1.01260723461168544723 -1.25203509966742121406  
O 1.88663414182122934903 1.55027427542634876900 -1.03609458614621297023  
H -4.57823241128767666197 -1.39524008912153063555 1.02348016371957695192  
H -7.42997741313471138369 -3.24740064355412005881 -0.89718756333090010635  
H -7.36454195625347107779 -2.04670254738079826495 0.40127385427818845764  
H -7.25800073511975529783 -4.28887454109575827488 1.38123265711209386453  
H -5.73251742927461993560 -3.44388462154154817441 1.63067921988031661051  
H -6.34232633799424405652 -5.67101943541446296138 -0.34266356840035244735  
H -4.93728852682481367253 -4.63755971613966355704 -0.54921363867678663073  
H -4.45367138067020462699 -6.78830702863310353479 0.61580306876500179314  
H -5.52031206310690869543 -6.30528714022768710379 1.93397513970384338222  
H -4.02770823983316983430 -4.40732720261506560888 2.47834519546947706914  
H -3.19368896466041718440 -5.95197107773874201087 2.53401023353408438865  
H -3.03903920500671453908 -3.92909004139257289623 0.25604610431734742271  
H -2.25944665070926165029 -5.51225383092737075685 0.25302586423713485653  
H -1.75982599047440957385 -3.28062747686964328864 2.27554874509993121379  
H -0.96202344046049603765 -4.85392049565242800213 2.28170343939588393667  
H -0.80412953194686564995 -2.81856008008048597446 0.01345163420842262342  
H 0.01700061595950378909 -4.37492054265340701846 0.04958674272496010893  
H 0.45015477024170985620 -2.12627819838234799477 2.06757545323534230874  
H 1.29280819134542213078 -3.67406305466530547221 2.05987470077715828509  
H 2.23529568155630098403 -3.13941643435164330356 -0.19090096943500808879  
H 1.40456984548921637312 -1.58516094083434477824 -0.16200966279834241868  
H 2.67005341760066672308 -0.98550908332276854207 1.92372897903291018018  
H 3.56526767523564647178 -2.50087103134030064311 1.78212463416453248399  
H 4.87807637911952163279 -0.64837609236006710223 0.80466705669216564978  
H 4.39387153455286849635 -1.76051284438191824044 -0.47764084262541334214  
H 3.53995804648836376316 -0.23012225331632135683 -0.26522231387538114378  
H -5.91098312518298385498 -2.64806880259481447482 -2.87873901231441520210  
H 2.09410735992364793745 1.70135191712039479661 1.12975658185130622968  
H 4.14513009165331691719 2.01856664060403412364 3.22060894543144726754  
H 3.47754307064959711226 3.09594132827122425766 4.44462649813145560529  
H 3.26905123092645455429 3.61196065405444866059 1.44629099803691141268  
H 4.56234528544477324630 4.20716404320934334038 2.47361720104218063554  
H 2.94432827758932269546 5.43995086437981356653 3.86827663632121909743  
H 3.00352243946838193267 5.98226553588006293438 2.19147811621773458413  
H 0.70968998704575991798 5.91723513332552020216 3.13976006267437002251  
H 0.84787763297383356154 4.18037335302266477299 3.36777268761996229074  
H 0.85032604496172292663 5.68886057080174190048 0.71998168974874754422  
H 1.22756171577946560092 3.97362164148657459606 0.85024062613370543495  
H -1.40572034335059048438 5.25981667752191839327 1.66967167896115276093  
H -0.98143697417823838602 3.56765326654387804339 1.92500560400202247457  
H -0.59664872017333414611 3.34687460159041272334 -0.56320116971779621284  
H -1.22784333778883980592 4.97853060923868717680 -0.76609720236384770686  
H -3.38883822085987462813 4.27359835187744874219 0.24642911870634290339  
H -2.74618309102885671535 2.65225025595397712053 0.49762874660726841292  
H -2.42828316460525206466 2.41927103555710676375 -1.98133579819796734611  
H -3.14523273580076656586 4.01177212000847038809 -2.20486437003821711400  
H -4.53848867066708905327 1.63277991559657875698 -0.89573042957687665222  
H -5.26217405045756958515 3.21563678021822330066 -1.18265680905155767810  
H -4.22067870374398257383 1.32850373037246272112 -3.34308553950693898571  
H -4.95194877021101564907 2.90472155714463609044 -3.63690504150191751265  
H -6.35676753411241790559 0.54261980488882322060 -2.29803797786504082623

H -6.60591348511872933358 1.07404803385159164364 -3.96229450402725547065  
H -7.08664716621215884373 2.11664524445133217512 -2.62055270978505827628  
H -2.00349592633399442576 2.25612246671681226928 8.34030257932652574482  
H -2.03525014097668011104 0.86650462586746956895 9.47075752196286657636  
H -2.55605318271791448481 0.16111055384557074199 7.08752218207234907510  
H -1.03729773371161204665 -0.57930655838914257849 7.68508591249098138576  
H 2.37852769864404089972 2.70794915917792833326 9.01316319839668267377  
H 0.40563943402326357868 0.88262768392933221850 -4.56653265371894523383  
H 1.46509973377699820318 2.00866809392800993450 -3.67624042653098603850  
H 2.93165066210419267279 0.15397100531066437723 -3.01066292626474130145  
H 2.75324792399768503159 -2.06621869722700779448 -3.93069069042224272792  
H 1.32172018085205156268 -1.67632782559118242993 -2.98710747511164642631  
H 0.00566872497869106221 -1.32433070566984545380 -5.04795739580182889483  
H 0.76768257743324341824 -2.90690179301281048652 -5.06603235811572272240  
H 1.44362300258918696549 -1.60306051178393138557 -6.04044903111280451213  
H 2.42849496142593901382 0.60076437290655515522 -5.96761762200619383378  
H 3.73028412150507726608 -0.45234268895226903417 -5.41115507604205969727  
H 4.68418732891691291798 1.41347794967793594090 -4.08138455801392563416  
H 3.41395788032120250932 2.48664349169242848703 -4.66144111492123691676  
H 5.44358026121329707792 1.05461751297525552218 -6.42737473836212203082  
H 4.16726067615735740191 2.12709881535029277089 -7.00295534139977338128  
H 5.16960209738281051273 4.01358856018806076094 -5.70923548992785523382  
H 6.44485062325912139158 2.94036677465553397681 -5.13289664078893004273  
H 6.33217978199590714183 3.33370417254921891370 -6.85011099314352112088

**SMD(chloroform)-MN15/def2-SVP optimized geometries (truncated monomers)**

TPD2T-T

43

Coordinates from ORCA-job opt\_freq E -2597.010156405765

|   |                   |                   |                   |
|---|-------------------|-------------------|-------------------|
| O | -3.63662123222927 | 0.41861247262620  | -1.44245730836093 |
| C | -2.51407742482335 | 0.12578147456445  | -1.19658126486973 |
| C | -1.73886453935406 | 0.27243403388984  | 0.06083001894344  |
| C | -1.93926129048362 | 0.75490044324782  | 1.31773544201646  |
| C | -3.11295007513210 | 1.41078375906797  | 1.90574878681314  |
| C | -3.24376034730685 | 1.89127417483467  | 3.19232944882593  |
| C | -4.46747500376415 | 2.54429304780096  | 3.42296610342600  |
| C | -4.85216118992899 | 3.20727847588538  | 4.71817420874641  |
| C | -5.25871148383494 | 2.51439688136330  | 2.31258846705063  |
| S | -4.53508232435992 | 1.72810964781020  | 0.96688697077395  |
| S | -0.47933038627721 | 0.53389703557714  | 2.24764151645089  |
| C | 0.38148575079107  | -0.19597092522804 | 0.92009691021615  |
| C | 1.78552438699895  | -0.60203157748188 | 1.05174836361023  |
| C | 2.59205034633055  | -0.44774415084463 | 2.12519394782714  |
| C | 3.92574850642018  | -0.90149159496799 | 1.93143924019685  |
| C | 4.93578974164813  | -0.80450934254958 | 3.04506282314964  |
| C | 4.11606025368666  | -1.39687727958157 | 0.66174513442281  |
| C | 5.31026017215704  | -1.93810563190611 | -0.01412463534383 |
| C | 5.33086141497268  | -2.50016704278269 | -1.27186575918996 |
| C | 6.60849675137056  | -2.91477008727352 | -1.68436170084764 |
| C | 7.56522239242212  | -2.67013975344042 | -0.75075610033325 |
| S | 6.91509973546652  | -1.92833168255875 | 0.65442596876655  |
| S | 2.65165567832792  | -1.34031466459014 | -0.28031378040198 |
| C | -0.44844987988413 | -0.26052836156020 | -0.16054128815669 |
| N | -1.64277376287225 | -0.47930200308272 | -2.10209377284846 |

|   |                   |                   |                   |
|---|-------------------|-------------------|-------------------|
| C | -2.00912644207168 | -0.79583946266271 | -3.46600601839064 |
| C | -0.38620451889896 | -0.75171285874901 | -1.55548697887789 |
| O | 0.49675121974863  | -1.28546321352178 | -2.13985276956511 |
| H | -2.46632995115830 | 1.76653255326540  | 3.93417117289532  |
| H | -5.83286509720584 | 3.67394448449683  | 4.62677538789289  |
| H | -4.94196083365478 | 2.47247547938405  | 5.52199276315794  |
| H | -6.24833137950643 | 2.93471343669254  | 2.20439995315264  |
| H | 2.24125540182366  | 0.00229071705404  | 3.04434022674214  |
| H | 5.03427881835979  | 0.22988149138780  | 3.38001228513453  |
| H | 5.93026972744613  | -1.10133096968321 | 2.73811321360426  |
| H | 4.45146402819941  | -2.61473811322522 | -1.88898259943738 |
| H | 6.80746702579428  | -3.37716799309078 | -2.64089317761293 |
| H | 8.62338621244644  | -2.88183472087128 | -0.79493596568704 |
| H | -1.29824418899965 | -1.51806967336505 | -3.85446768903698 |
| H | -2.99769903545647 | -1.24952732942159 | -3.47961159849283 |
| H | -4.12711554166742 | 3.96621058000473  | 5.01503051619060  |
| H | 4.65630234502341  | -1.44453156073292 | 3.88357038305408  |
| H | -2.01685930226378 | 0.09625760181847  | -4.09165179470739 |

#### TPD2T-2T

50

Coordinates from ORCA-job opt\_freq E -3146.924411453214

|   |                   |                   |                   |
|---|-------------------|-------------------|-------------------|
| O | 3.26664507899275  | 1.04760171741461  | -1.33374682915229 |
| C | 2.19709170098117  | 0.56073246392915  | -1.48920484825708 |
| C | 1.00127480242116  | 0.61393172680292  | -0.64173917848741 |
| C | 0.61694542002629  | 1.21383338120993  | 0.51613035790683  |
| C | 1.37098393419077  | 2.07418046086271  | 1.43064014265093  |
| C | 0.89581965285270  | 2.71242040542992  | 2.53988075995358  |
| C | 1.84245770621623  | 3.49977926410015  | 3.20564039229150  |
| C | 1.46357957606300  | 4.34371672956693  | 4.39530287812117  |
| C | 3.08651272659220  | 3.43605977764236  | 2.59426474675824  |
| C | 4.37851918731724  | 4.05351149445626  | 2.94179871108763  |
| C | 5.49789360854784  | 4.08351174195446  | 2.13751690598028  |
| C | 6.60875259836624  | 4.70156854463950  | 2.73903005611333  |
| C | 6.34779356378513  | 5.13367370319040  | 3.99843860566324  |
| S | 4.72817424893760  | 4.79776367801061  | 4.47109919656734  |
| S | 3.06117605770936  | 2.42613335785663  | 1.18211658324047  |
| S | -1.06579008690839 | 0.83588504272273  | 0.82218481681396  |
| C | -1.21658474496803 | -0.13477043972653 | -0.61874135953226 |
| C | -2.47348141705681 | -0.81280500815594 | -0.94638901445329 |
| C | -3.66278179358854 | -0.74247890036322 | -0.26295467221531 |
| C | -4.66961080937362 | -1.56502352811740 | -0.77136584406901 |
| C | -6.02875715820540 | -1.66296367919776 | -0.12831500198866 |
| C | -4.25085372647429 | -2.25189373059679 | -1.89895388578085 |
| C | -4.95273972547360 | -3.18828465135297 | -2.79563513458378 |
| C | -4.36900966504765 | -3.91000981863575 | -3.81421443332306 |
| C | -5.27893703373029 | -4.70564251301112 | -4.54122148861700 |
| C | -6.54752054943023 | -4.58995698837078 | -4.09129701108177 |
| S | -6.66003921342348 | -3.50094009993738 | -2.75598756541516 |
| S | -2.59118497589935 | -1.89718884186672 | -2.29443944738564 |
| C | -0.02283165190912 | -0.13825139792994 | -1.27856068415052 |
| N | 1.82783641683549  | -0.20766456008188 | -2.61190464976708 |
| C | 2.70354489733918  | -0.45071177502575 | -3.73829168372185 |
| C | 0.51999186089709  | -0.66295220606219 | -2.55228784332345 |

|   |                   |                   |                   |
|---|-------------------|-------------------|-------------------|
| O | -0.00286099388762 | -1.31335528185934 | -3.39690620581103 |
| H | -0.13328409044312 | 2.60991848588094  | 2.85654141350217  |
| H | 1.18748663704741  | 3.71436127896969  | 5.24469653864431  |
| H | 2.27607657466494  | 4.96872854771821  | 4.74322775674292  |
| H | 5.50784541319963  | 3.67212068131478  | 1.13840750244265  |
| H | 7.56629475312865  | 4.81749765245929  | 2.25112495169789  |
| H | 7.00565109823316  | 5.64045287118658  | 4.68892441939214  |
| H | -3.78429325285700 | -0.10010188513117 | 0.59882416398880  |
| H | -6.61234424558067 | -0.75887492135164 | -0.32122065226868 |
| H | -6.62329456523274 | -2.47016600208323 | -0.53654055723209 |
| H | -3.31080299766712 | -3.86390501967878 | -4.02690353768960 |
| H | -4.99170779396659 | -5.33827576551936 | -5.36934973260143 |
| H | -7.44050097018324 | -5.07904821567258 | -4.45131504282528 |
| H | 2.18616717500212  | -0.20130756651276 | -4.66294318877662 |
| H | 3.56254626553802  | 0.20665664424393  | -3.64993967748384 |
| H | 0.62821026208070  | 4.99986166955429  | 4.14739342145423  |
| H | -5.94198180205035 | -1.82214991628787 | 0.94653619120465  |
| H | 3.02464616069119  | -1.49072851048813 | -3.77638566622419 |

TPD2T-3T

57

Coordinates from ORCA-job opt\_freq E -3696.852062088439

|   |                   |                   |                   |
|---|-------------------|-------------------|-------------------|
| O | 3.71762466129475  | -0.06981903013678 | -1.16929012284155 |
| C | 2.68020669025905  | -0.56039560628744 | -0.87127489505811 |
| C | 1.53399185168161  | 0.01604702483296  | -0.15199364950252 |
| C | 1.18656872238932  | 1.22302702547258  | 0.38695974887320  |
| C | 1.90536123779849  | 2.49851174182566  | 0.39414042993826  |
| C | 1.46168575100667  | 3.69715999447147  | 0.90681597515610  |
| C | 2.34367383351031  | 4.76897114855397  | 0.72422270345025  |
| C | 1.97818104804852  | 6.16954603520817  | 1.14665278800576  |
| C | 3.49050318080412  | 4.38225672161602  | 0.07534202545994  |
| C | 4.68739656789826  | 5.14643902414024  | -0.30710046215980 |
| C | 5.80129794623471  | 4.64179432293460  | -0.94190741063433 |
| C | 6.80615430253150  | 5.60578907447321  | -1.17418592770712 |
| C | 6.46430731268691  | 6.83216541681754  | -0.72548379798321 |
| S | 4.89615351839742  | 6.84313794886985  | -0.00125312506263 |
| S | 3.46944188064864  | 2.67336584090788  | -0.32092586121862 |
| S | -0.38922966362076 | 1.08402134076510  | 1.11176693442871  |
| C | -0.55947484735312 | -0.60064588583956 | 0.66790533544403  |
| C | -1.77455120022864 | -1.34209095511274 | 1.01333947466557  |
| C | -2.84489953302210 | -0.87242327804973 | 1.69731307513998  |
| C | -3.88453426300588 | -1.80802573269499 | 1.87409637266476  |
| C | -5.12570785599771 | -1.46630860456161 | 2.65805656129594  |
| C | -3.58345608268042 | -3.02604245933515 | 1.29075306803806  |
| C | -4.37093456906956 | -4.26272008074197 | 1.18647819764146  |
| C | -3.97674070759885 | -5.41202987727800 | 0.57549695521079  |
| C | -4.95050969566491 | -6.44521412527337 | 0.59881429223229  |
| C | -6.09587347501618 | -6.08577323163173 | 1.23089556102484  |
| C | -7.30790355379389 | -6.87996467504237 | 1.44240981216074  |
| C | -8.45606178906383 | -6.51422483404810 | 2.06768953227121  |
| C | -9.44663252878380 | -7.54609857501124 | 2.09492167540500  |
| C | -9.02249362443252 | -8.67400834027126 | 1.48688270270292  |
| S | -7.41613236792837 | -8.52011716852649 | 0.86563053656237  |
| S | -5.98923499286298 | -4.44400902660292 | 1.81693900283169  |
| S | -2.01405637027793 | -3.01290573598544 | 0.54259859658413  |

|   |                    |                   |                   |
|---|--------------------|-------------------|-------------------|
| C | 0.55865560063486   | -0.99660832264377 | 0.00155220585767  |
| N | 2.32248930390838   | -1.89259083919483 | -1.14141282500674 |
| C | 3.16445791119396   | -2.81194320067821 | -1.87676525961808 |
| C | 1.07568701518769   | -2.23189879817679 | -0.64083631651317 |
| O | 0.58487054869768   | -3.30874335449775 | -0.73323528313968 |
| H | 0.50191410142752   | 3.78742145183836  | 1.39656278560218  |
| H | 1.24358892275650   | 6.13813051610177  | 1.95073279238063  |
| H | 2.83261456624272   | 6.71732707341442  | 1.53535169266635  |
| H | 5.88607954899242   | 3.60330714768577  | -1.22799368900489 |
| H | 7.74646947451828   | 5.38602338058945  | -1.65999099413790 |
| H | 7.03448768761592   | 7.74845911104071  | -0.76666859805372 |
| H | -2.88092384213532  | 0.14082472125238  | 2.07296562037804  |
| H | -5.27812858835846  | -0.38755834413015 | 2.66474930953280  |
| H | -6.02083697561561  | -1.89609900401986 | 2.21550081914071  |
| H | -3.00501647649563  | -5.51440474540838 | 0.11454809888286  |
| H | -4.80710037793588  | -7.42323401750589 | 0.16174430126973  |
| H | -8.59399326964599  | -5.53211998707170 | 2.49877458076435  |
| H | -10.42091935594988 | -7.43567001336391 | 2.54927459138660  |
| H | -9.55567640307164  | -9.60449739783638 | 1.35876499306023  |
| H | 4.16175264287878   | -2.38809100826843 | -1.93606050714874 |
| H | 3.23239946428957   | -3.75551722831362 | -1.33898542537691 |
| H | 1.57508023533896   | 6.74491449381167  | 0.31059534476567  |
| H | -5.06369898072461  | -1.82962709951025 | 3.68608256551513  |
| H | 2.77192079386096   | -2.99536601137298 | -2.87622417172321 |

#### TPD2T-TT

46

Coordinates from ORCA-job opt\_freq E -3070.092376947178

|   |                   |                   |                   |
|---|-------------------|-------------------|-------------------|
| O | 1.19256278578840  | 1.60941672403259  | -2.69995116699634 |
| C | 0.69168477665671  | 1.33842702412056  | -1.65485542828467 |
| C | 0.56180577127801  | 0.03569907257705  | -0.95597510799498 |
| C | 0.89919437127858  | -1.27603172652971 | -1.15139521552718 |
| C | 1.59642048968965  | -1.91925903709432 | -2.26498131176306 |
| C | 2.10298614206709  | -1.32996812529226 | -3.40385537447176 |
| C | 2.77375245463658  | -2.23487062621866 | -4.25328124068113 |
| C | 3.45593897203929  | -1.84185334851348 | -5.53555840687799 |
| C | 2.73199641625047  | -3.50552375236804 | -3.76597526859988 |
| S | 1.90929700097523  | -3.62476865655552 | -2.26128717612975 |
| S | 0.36775434064007  | -2.21329727314746 | 0.21329247964015  |
| C | -0.32481978534415 | -0.83035706276877 | 1.02944552316784  |
| C | -0.98453768430996 | -0.98068595709274 | 2.32917207178673  |
| C | -1.11613812797903 | -2.13035041428130 | 3.04847468684867  |
| C | -1.80821611306225 | -1.98512573174827 | 4.25704338808587  |
| C | -2.09243523897340 | -3.17020914604030 | 5.14444273206124  |
| C | -2.20804749228160 | -0.67176555922425 | 4.46644539003108  |
| C | -2.92056704586824 | -0.04582360983502 | 5.58965073141330  |
| C | -3.25383316077695 | 1.28244648055175  | 5.67663085126634  |
| C | -3.92365051591349 | 1.58857536121215  | 6.88660224864426  |
| C | -4.10249999682994 | 0.50073356734835  | 7.72438237029908  |
| C | -4.77868265178457 | 0.81406870510409  | 8.94229238542071  |
| C | -5.08611195696595 | 2.11775774958910  | 8.98043242157775  |
| S | -4.58882427277899 | 3.01563205154857  | 7.58318374368684  |
| S | -3.43454273734349 | -0.93842603863530 | 7.02338720936100  |
| S | -1.73290560722490 | 0.36295732620603  | 3.15636975258290  |

|   |                   |                   |                   |
|---|-------------------|-------------------|-------------------|
| C | -0.12863417380541 | 0.27435724462685  | 0.26208361253767  |
| N | 0.08032795353066  | 2.26720230291297  | -0.83161941137335 |
| C | -0.03748634580860 | 3.66913944269243  | -1.17207775869451 |
| C | -0.45217286051643 | 1.70119210515343  | 0.33964687387905  |
| O | -1.04209701992974 | 2.30635417675804  | 1.17115563297585  |
| H | 1.98486152670683  | -0.27773901223279 | -3.60888833587226 |
| H | 2.72798508701811  | -1.50033421058383 | -6.27513430494541 |
| H | 3.95391231648360  | -2.70441579009647 | -5.97857561108357 |
| H | 3.15447833270126  | -4.39629956383812 | -4.20725433009496 |
| H | -0.71200954223056 | -3.07046858032347 | 2.69957320548398  |
| H | -1.99833600116797 | -2.92423052853286 | 6.19932043865473  |
| H | -1.36946751415129 | -3.96199865358651 | 4.95177722074434  |
| H | -3.03047763954981 | 2.00953773948880  | 4.91024407601249  |
| H | -5.01064745758646 | 0.10350419316331  | 9.72191253267588  |
| H | -5.59828904100586 | 2.64935315373542  | 9.76949809654876  |
| H | -0.80199914656622 | 4.11120626346336  | -0.54102142274335 |
| H | -0.35657850217462 | 3.76596688140367  | -2.20753850809908 |
| H | 4.19433352925166  | -1.05577319329266 | -5.37421730834592 |
| H | -3.10243532137421 | -3.55505855156011 | 4.98868031011003  |
| H | 0.90869256471194  | 4.19189007990368  | -1.03693999521739 |

#### TPD2T-CPDT

57

Coordinates from ORCA-job opt\_freq E -3262.774621188197

|   |                   |                   |                   |
|---|-------------------|-------------------|-------------------|
| O | -5.15548692189063 | -1.16442228715028 | 1.74290961619155  |
| C | -4.12146846204191 | -0.99826489772794 | 1.18525035497352  |
| C | -3.07494455149506 | 0.03681405724371  | 1.39461703472327  |
| C | -2.87755486592147 | 1.11725035378349  | 2.19369695617541  |
| C | -3.72516441550837 | 1.69178702715227  | 3.24487274369306  |
| C | -3.45562934962424 | 2.80751396590531  | 4.00447828163593  |
| C | -4.49997516597656 | 3.14904913953179  | 4.89575968783523  |
| C | -4.48133704908681 | 4.36481039455598  | 5.78248026751267  |
| C | -5.52818862947335 | 2.27583062426295  | 4.80253148544928  |
| S | -5.27799295737735 | 1.02163134411671  | 3.63861575157066  |
| S | -1.35936696970801 | 1.87087540596072  | 1.76665346894147  |
| C | -1.02211178271473 | 0.71437222919871  | 0.50635127590866  |
| C | 0.19584407635897  | 0.80789505089673  | -0.30355031936283 |
| C | 1.11250293481452  | 1.80522729448160  | -0.30946130749833 |
| C | 2.20468122091837  | 1.59714169267178  | -1.19803462071660 |
| C | 3.35115018135706  | 2.56950122616101  | -1.30036506349682 |
| C | 2.09741307464198  | 0.40578419052485  | -1.87058903831352 |
| C | 2.98463567747123  | -0.23960001062557 | -2.85509208098302 |
| C | 2.76172651251990  | -1.48284491528937 | -3.42881495634871 |
| C | 3.76779453197645  | -1.86144517680433 | -4.30032341868350 |
| C | 4.75969962466901  | -0.90947444155034 | -4.41762041574217 |
| C | 5.76567031275519  | -1.39579729585922 | -5.34119110732360 |
| S | 7.26123305823460  | -0.85486606231557 | -6.03552845806002 |
| C | 7.38387786273916  | -2.33839430725347 | -6.91659169380877 |
| C | 6.35441502103155  | -3.18604428225403 | -6.69259127845450 |
| C | 5.40921883115606  | -2.63843494916476 | -5.77461435321399 |
| C | 4.09605007105492  | -3.08366103929357 | -5.12803933357961 |
| S | 4.46906009708391  | 0.46765841955323  | -3.43461833053860 |
| S | 0.64172674095872  | -0.45562981411027 | -1.42716772384945 |
| C | -2.04118259697004 | -0.19236378151693 | 0.45416234511958  |

|   |                   |                   |                   |
|---|-------------------|-------------------|-------------------|
| N | -3.65780611746031 | -1.78494617118496 | 0.14020075313027  |
| C | -4.38438973503495 | -2.92191389647398 | -0.38296847992279 |
| C | -2.41500624721359 | -1.36093255881270 | -0.36053556703033 |
| O | -1.85277597250941 | -1.87212473583614 | -1.27032402094116 |
| H | -2.52928078720275 | 3.35787656050259  | 3.90819411770775  |
| H | -3.64689381157541 | 4.32516358587532  | 6.48631789733166  |
| H | -5.39277603278430 | 4.41787356927051  | 6.37760420878778  |
| H | -6.45379825197886 | 2.29411278472554  | 5.36005983267459  |
| H | 1.00931481554887  | 2.68026739306009  | 0.31804011109152  |
| H | 2.97641350359135  | 3.59406283768340  | -1.31892043164371 |
| H | 3.91212067557053  | 2.45938630567150  | -2.21872592607619 |
| H | 1.88358702076353  | -2.06844772987708 | -3.19915321291393 |
| H | 8.23878683178892  | -2.48623053613036 | -7.56020134897574 |
| H | 6.27263640206781  | -4.15694496667796 | -7.16093704950590 |
| H | -3.95052631473805 | -3.19293736876347 | -1.34013964072694 |
| H | -5.42180766585915 | -2.64245956663266 | -0.55611187266977 |
| H | -4.39498916345782 | 5.28161967982903  | 5.19697806403454  |
| H | 4.05526561090355  | 2.44685507252755  | -0.47460032807284 |
| C | 4.29192285242928  | -4.33916965464266 | -4.24138903504286 |
| C | 2.99634148188750  | -3.49762565446000 | -6.12650449944057 |
| H | -4.34875732914041 | -3.76733330696602 | 0.30304353143526  |
| H | 5.05623824374067  | -4.18349654240426 | -3.47703041131901 |
| H | 4.59880555520536  | -5.17973675674270 | -4.86440130188909 |
| H | 3.35778353089381  | -4.58378043987055 | -3.73470858666167 |
| H | 2.74976527780556  | -2.69661934617277 | -6.82700803273340 |
| H | 2.08937923590892  | -3.75981155614739 | -5.58045328547981 |
| H | 3.31501910219630  | -4.36729118093509 | -6.70186446870386 |

### TPD2T-DTP

53

Coordinates from ORCA-job opt\_freq E -3239.757638438616

|   |                   |                   |                   |
|---|-------------------|-------------------|-------------------|
| O | 0.99026898991278  | -1.36967562670601 | 5.98273025628396  |
| C | 0.80129302174478  | -1.54006597181632 | 4.82122865961272  |
| C | 0.72705314568286  | -0.56524614209033 | 3.70407091360320  |
| C | 0.85827995343664  | 0.78313256271419  | 3.52109945913812  |
| C | 1.17808759451930  | 1.84515127895826  | 4.47718893312684  |
| C | 1.53083239328730  | 1.71891725376531  | 5.79636025249816  |
| C | 1.75702744880117  | 2.96730921109206  | 6.44583314931609  |
| C | 2.10668680924151  | 3.09423825285379  | 7.90352106351278  |
| C | 1.57451299706625  | 4.00669331866506  | 5.60681299174913  |
| S | 1.12481827810982  | 3.52086585569219  | 4.00897647143216  |
| S | 0.56325593819056  | 1.16084712186070  | 1.85543093362910  |
| C | 0.25551439455794  | -0.49818140100159 | 1.42097690075115  |
| C | -0.06981616575022 | -0.84729072894864 | 0.04042002429095  |
| C | -0.42321774755194 | -2.06084921053132 | -0.47805375644124 |
| C | -0.69122518245608 | -2.04974753302428 | -1.85264399057909 |
| C | -1.20850174676189 | -3.28403318723204 | -2.54691917741957 |
| C | -0.52487409196999 | -0.79153602975235 | -2.41586201203966 |
| C | -0.66273194122580 | -0.29080210043256 | -3.79270336407215 |
| C | -0.73943063565847 | 1.02709273536945  | -4.12575479202619 |
| C | -0.81496584827743 | 1.22523486276711  | -5.52898230167325 |
| C | -0.79899896880144 | 0.03311030989181  | -6.25839410712452 |
| C | -0.88888391382339 | 0.39417238632183  | -7.62001902950498 |
| S | -0.94067372791448 | -0.28345378320717 | -9.19847846779305 |

|   |                   |                   |                    |
|---|-------------------|-------------------|--------------------|
| C | -1.04302646821618 | 1.31040086593378  | -9.87624635419320  |
| C | -1.03913705629209 | 2.30829613092695  | -8.98377711217534  |
| C | -0.94892876560634 | 1.79186267797037  | -7.66034043311289  |
| N | -0.92021782027686 | 2.29890690519795  | -6.38721780659434  |
| C | -0.77121811345259 | 3.69247194318739  | -6.02711760084417  |
| S | -0.66715945027247 | -1.34348838924673 | -5.22158864740365  |
| S | -0.05259387501904 | 0.36636429298431  | -1.21306998686019  |
| C | 0.38391402913577  | -1.27886231891968 | 2.53178371660736   |
| N | 0.55254173746168  | -2.78156293377088 | 4.25125302639517   |
| C | 0.51753615614996  | -4.01484219316034 | 5.00936555867032   |
| C | 0.22414698172695  | -2.70236090774684 | 2.89656334957797   |
| O | -0.14701895728827 | -3.62792906546867 | 2.25001097050931   |
| H | 1.62074654696823  | 0.76007084238462  | 6.28102376318811   |
| H | 2.26297362590220  | 4.13940631547529  | 8.17015527592653   |
| H | 3.03470928140483  | 2.56526730062882  | 8.13020907438151   |
| H | 1.67414552751959  | 5.05914315247763  | 5.82871495390436   |
| H | -0.49244385911501 | -2.94779604676527 | 0.13130526470254   |
| H | -0.64957386910804 | -4.16309567057338 | -2.22443415795802  |
| H | -1.10160365630348 | -3.23940883891153 | -3.62426158816388  |
| H | -0.74802243091751 | 1.80863644244161  | -3.38117494434359  |
| H | -1.09989763163950 | 1.39473282725796  | -10.95184341640829 |
| H | -1.09592094118111 | 3.35443164170821  | -9.24664189475723  |
| H | -1.05632792771714 | 3.82638001731551  | -4.98689928163943  |
| H | -1.44386069463629 | 4.30044763763062  | -6.62970951328695  |
| H | 0.18161336069766  | -3.79845937817717 | 6.01962474025297   |
| H | -0.20674079502305 | -4.68444131273840 | 4.55464739201061   |
| H | 1.31470496753264  | 2.69094946041095  | 8.53662690238060   |
| H | -2.27021424765097 | -3.42711404219988 | -2.33596698137416  |
| H | 0.25293186827845  | 4.03807970511164  | -6.17446717322882  |
| H | 1.49618951677820  | -4.49264944127398 | 5.03967750046617   |

#### TPD2T-EDOT

49

Coordinates from ORCA-job opt\_freq E -2823.437557307014

|   |                   |                   |                   |
|---|-------------------|-------------------|-------------------|
| O | -1.50920782470538 | -0.17332019596943 | -3.52622222431903 |
| C | -0.90913919283095 | 0.12645723365631  | -2.54875376485132 |
| C | -1.28165292857873 | 0.00640477653227  | -1.13338345232087 |
| C | -2.34683744133655 | -0.46483047245017 | -0.41865144511803 |
| C | -3.57773684779145 | -1.12445492249243 | -0.87184090346935 |
| C | -4.61285477854895 | -1.56505596963244 | -0.08355032097638 |
| C | -5.64232970476800 | -2.21755388672367 | -0.81389005418265 |
| C | -6.85075806033495 | -2.84802050273918 | -0.17660749492081 |
| C | -5.36254184885476 | -2.24541089552198 | -2.13328449261144 |
| S | -3.85965956323618 | -1.49355518167221 | -2.54633964341599 |
| S | -2.04285281192845 | -0.21345412452342 | 1.27413418456776  |
| C | -0.47827689277726 | 0.52149984003710  | 0.99220392530401  |
| C | 0.32562857689547  | 1.00538276610988  | 2.11085763556037  |
| C | 1.56800282981363  | 1.59550669696971  | 2.06296379773528  |
| C | 2.04862907333191  | 2.02382163159501  | 3.30290198529428  |
| C | 3.36375318318821  | 2.74678971718482  | 3.43933746609467  |
| C | 1.18196951169415  | 1.70862022941285  | 4.33617779178818  |
| C | 1.28111327447650  | 1.91487482479258  | 5.79594207692008  |
| C | 0.31212787018065  | 1.55120801181494  | 6.71075153992327  |
| C | 0.65259055313909  | 1.83875270875899  | 8.05532107476320  |

|   |                   |                   |                   |
|---|-------------------|-------------------|-------------------|
| O | -0.17451212890782 | 1.57113051231526  | 9.08435769751238  |
| C | -1.49263385726872 | 1.32125058111296  | 8.65403068101547  |
| C | -1.50477981379005 | 0.38268528371594  | 7.46564181922022  |
| O | -0.84486618905603 | 0.96843968580743  | 6.36291735294963  |
| C | 1.87917566909980  | 2.40337051172976  | 8.17492723171162  |
| S | 2.63251556636046  | 2.60520616783151  | 6.64293677219532  |
| S | -0.25726205846355 | 0.92310405593138  | 3.74503821284559  |
| C | -0.23574416817286 | 0.55554806845357  | -0.34774022019159 |
| N | 0.36048620457857  | 0.72585770000510  | -2.54853246009752 |
| C | 1.11897862884897  | 0.99037787014667  | -3.75242041501979 |
| C | 0.82444912009093  | 1.01839520063963  | -1.27889052736398 |
| O | 1.87156869210012  | 1.54270895966547  | -1.06559259489729 |
| H | -4.64469635240323 | -1.43016958426076 | 0.98941727575399  |
| H | -7.49939483323313 | -3.28480348015780 | -0.93569395427450 |
| H | -7.44630734954088 | -2.10453321358974 | 0.35808702984818  |
| H | -5.96644651088441 | -2.67657249871126 | -2.91899175286759 |
| H | 2.11038492379829  | 1.71090902623063  | 1.13825527828272  |
| H | 4.19821058438772  | 2.06882648144781  | 3.24366908217263  |
| H | 3.53421519594859  | 3.12081165357490  | 4.44048886245384  |
| H | -1.97057900268772 | 2.26467647070501  | 8.37966566745341  |
| H | -2.00416050018072 | 0.87958500072835  | 9.50441060819766  |
| H | -2.51956720238247 | 0.18423446281563  | 7.13392281745541  |
| H | -1.00866289327954 | -0.55288796797419 | 7.73187910660143  |
| H | 2.38192080985660  | 2.71420638658950  | 9.07743304833700  |
| H | 0.45077559079702  | 0.90071840657680  | -4.60283121732842 |
| H | 1.49819518700619  | 2.00998467495257  | -3.72915895038671 |
| H | -6.56481958573519 | -3.63053583056434 | 0.52826205452505  |
| H | 3.41282789408695  | 3.59706361907977  | 2.75880808959140  |
| H | 1.95488657269816  | 0.29926723376288  | -3.85437086056080 |
